# Supplementary material for: A Multi-Method Approach for Proteomic Network Inference in 11 Human Cancers
Source: PubMed Central journal article supplement (PMC4771175; doi:10.1371/journal.pcbi.1004765), 2016-02-29

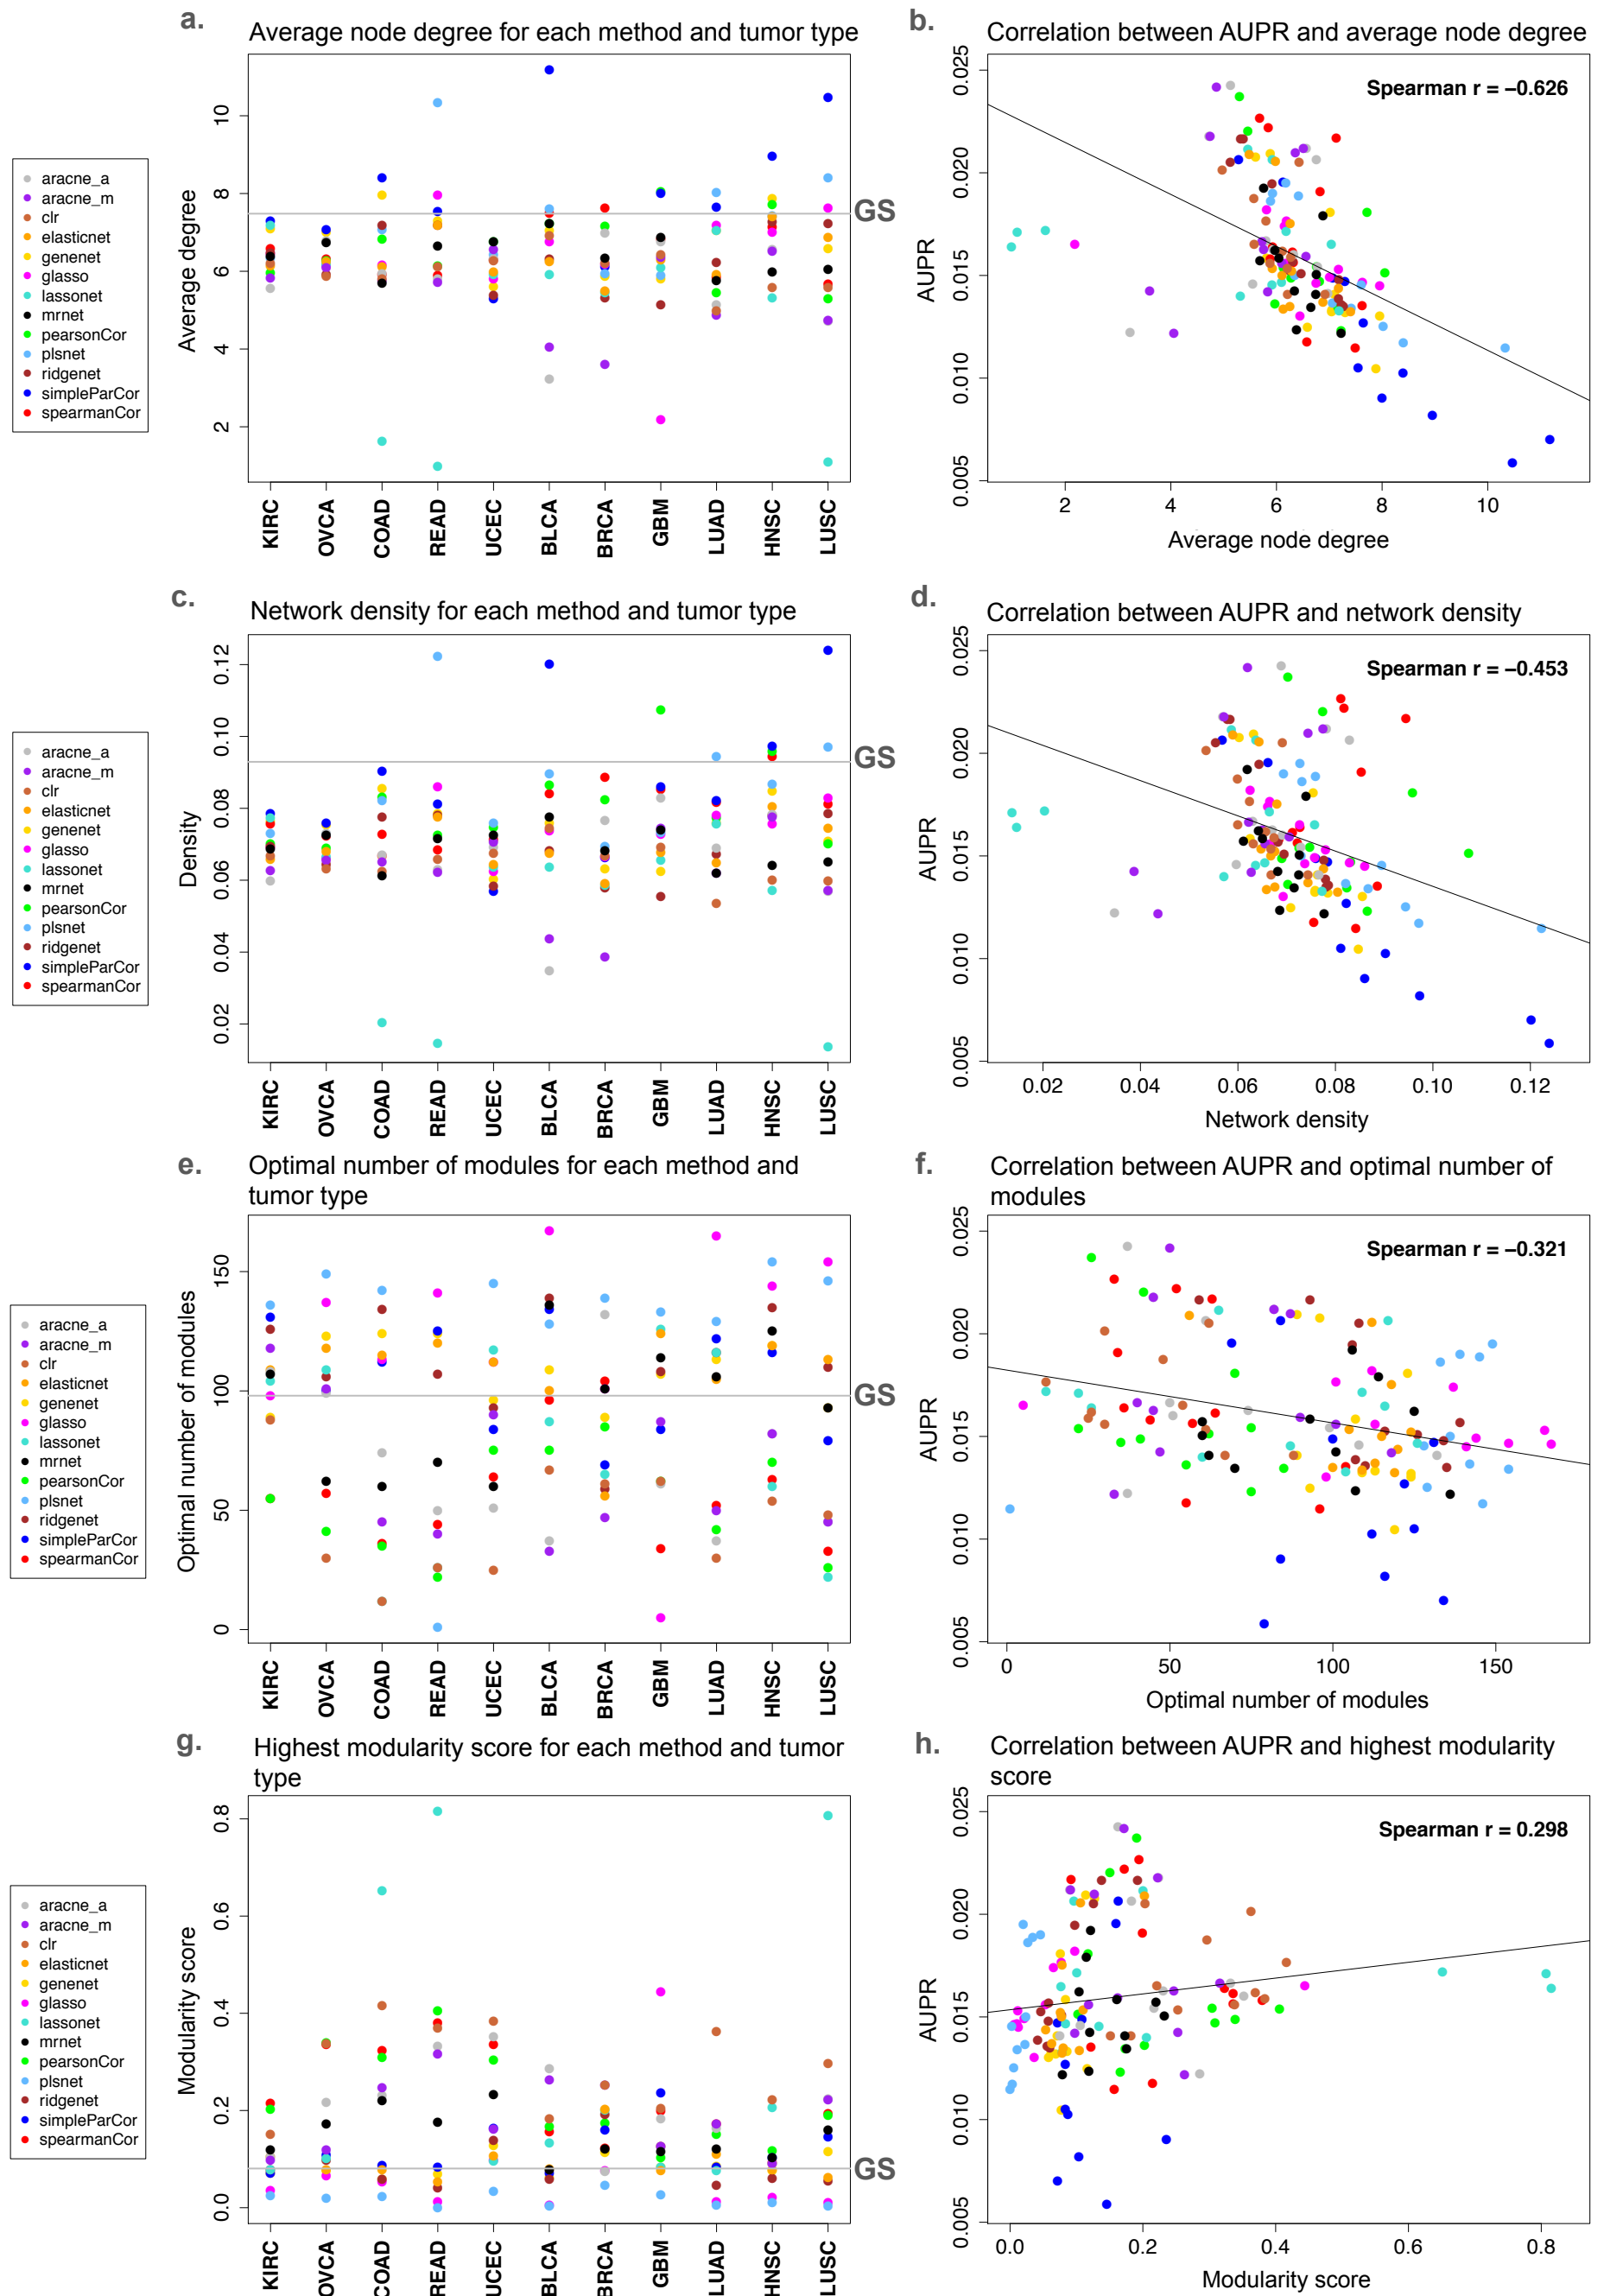

Supplement: pcbi.1004765.s002.pdf [file pcbi.1004765.s002.pdf]
