# Supplementary material for: A Multi-Method Approach for Proteomic Network Inference in 11 Human Cancers
Source: PubMed Central journal article supplement (PMC4771175; doi:10.1371/journal.pcbi.1004765), 2016-02-29
Supplement: pcbi.1004765.s007.pdf [file pcbi.1004765.s007.pdf]

| <b>TOP6 methods</b>  | <b>BLCA</b> | <b>BRCA</b> | <b>COAD</b> | <b>GBM</b> | <b>HNSC</b> | <b>KIRC</b> | <b>LUAD</b> | <b>LUSC</b> | <b>OVCA</b> | <b>READ</b> | <b>UCEC</b> | <b>UNION</b> |
|----------------------|-------------|-------------|-------------|------------|-------------|-------------|-------------|-------------|-------------|-------------|-------------|--------------|
| <b>ARACNE_A</b>      | 1249        | 1276        | 1057        | 1108       | 1110        | 1038        | 770         | 789         | 1268        | 1073        | 1164        | 6747         |
| <b>ARACNE_M</b>      | 1338        | 1261        | 1025        | 1094       | 1100        | 1091        | 769         | 792         | 1141        | 1059        | 1227        | 7129         |
| <b>CLR</b>           | 1294        | 1161        | 1085        | 1202       | 1043        | 1162        | 930         | 1042        | 1099        | 1143        | 1173        | 7020         |
| <b>LASSONET</b>      | 1107        | 1021        | 1334        | 1140       | 1172        | 1344        | 1317        | 1350        | 1156        | 1100        | 1108        | 8275         |
| <b>RIDGENET</b>      | 1174        | 985         | 1336        | 954        | 1359        | 1209        | 1159        | 1338        | 1095        | 1328        | 994         | 7547         |
| <b>SPEARMANCOR</b>   | 1341        | 1319        | 972         | 1099       | 1084        | 1151        | 842         | 801         | 1112        | 1018        | 1122        | 5826         |
| <b>TOP6 UNION</b>    | 3141        | 2981        | 2604        | 2944       | 3042        | 3269        | 2780        | 2441        | 3162        | 2700        | 3014        |              |
|                      |             |             |             |            |             |             |             |             |             |             |             |              |
| <b>Other methods</b> | <b>BLCA</b> | <b>BRCA</b> | <b>COAD</b> | <b>GBM</b> | <b>HNSC</b> | <b>KIRC</b> | <b>LUAD</b> | <b>LUSC</b> | <b>OVCA</b> | <b>READ</b> | <b>UCEC</b> | <b>UNION</b> |
| <b>ELASTICNET</b>    | 1163        | 1026        | 1124        | 1176       | 1370        | 1146        | 1090        | 1280        | 1158        | 1335        | 1119        | 7277         |
| <b>GENENET</b>       | 1318        | 1100        | 1488        | 1087       | 1474        | 1328        | 1319        | 1232        | 1312        | 1365        | 1048        | 8380         |
| <b>GLASSO</b>        | 1242        | 1157        | 1148        | 1198       | 1303        | 1205        | 1328        | 1411        | 1150        | 1480        | 1087        | 7054         |
| <b>MRNET</b>         | 1351        | 1186        | 1064        | 1287       | 1117        | 1193        | 1077        | 1131        | 1261        | 1244        | 1263        | 7923         |
| <b>PEARSONCOR</b>    | 1214        | 1254        | 1125        | 1216       | 1250        | 1021        | 775         | 806         | 1149        | 1042        | 1231        | 5614         |
| <b>PLSNET</b>        | 1301        | 1020        | 1222        | 954        | 1276        | 1111        | 1372        | 1462        | 1057        | 1757        | 1091        | 6499         |
| <b>SIMPLEPARCOR</b>  | 2090        | 1139        | 1570        | 1496       | 1656        | 1364        | 1430        | 1780        | 1322        | 1411        | 988         | 10573        |
| <b>ALL13 UNION</b>   | 6959        | 4534        | 5460        | 5890       | 5882        | 4793        | 5155        | 6247        | 4653        | 6376        | 4253        |              |
