# Supplementary material for: A Multi-Method Approach for Proteomic Network Inference in 11 Human Cancers
Source: PLoS Comput Biol. 2016 Feb 29;12(2):e1004765. doi: 10.1371/journal.pcbi.1004765 (PMC4771175; doi:10.1371/journal.pcbi.1004765)
Supplement: S1 Table — A) For each interaction, consensus weights in the 11 tested tumor types, pan-cancer recurrence, pan-cancer weight, group and module information, and the matching Reactome gene lists are provided. B) For each interaction, binary values are provided to indicate whether the consensus edge rank in the relevant tumor type was smaller (more significant) than 425. The sum of each row corresponds to the pan-cancer recurrence field in A. (XLSX) [file pcbi.1004765.s010.xlsx]

## Sheet: A) Discovery set edge weights
EDGE NUMBER	ANTIBODY 1	ANTIBODY 2	BRCA	OV	UCEC	BLCA	KIRC	READ	COAD	GBM	LUAD	LUSC	HNSC		PANCAN RECURRENCE	PANCAN WEIGHT	GROUP (Fig 5)	MODULE (Fig 6 and 7)		MATCHING REACTOME GENE LISTS
1	S6_pS235_S236	S6_pS240_S244	0.85834	0.92566	0.79131	0.88755	0.75901	0.65543	0.77898	0.97472	0.82509	0.70577	0.83025		11	0.817465	Positive dominant	2		NA
2	PKC.alpha	PKC.alpha_pS657	0.64124	0.7769	0.98387	0.88461	1.09768	0.86683	0.76782	0.83077	0.83695	0.60456	0.06441		10	0.759604	Positive dominant	2		NA
3	GSK3.alpha.beta_pS21_S9	GSK3_pS9	0.73178	0.59275	0.69752	0.70644	0.52347	0.68305	0.77422	0.70891	0.78785	0.85343	0.71439		11	0.70671	Positive dominant	2		NA
4	ACC_pS79	ACC1	0.78945	0.77947	0.74984	0.54603	0.73559	0.65821	0.63321	0.58114	0.63586	0.62721	0.47701		11	0.655729	Positive dominant	6		NA
5	Akt_pS473	Akt_pT308	0.75028	0.43369	1.011	0.49788	0.4096	0.38976	0.48725	0.69736	0.26831	0.50157	0.16504		10	0.510158	Positive dominant	2		NA
6	MAPK_pT202_Y204	MEK1_pS217_S221	0.51015	0.40986	0.68289	0.43478	0.32283	0.41565	0.41995	0.23278	0.47005	0.40864	0.35317		10	0.423705	Positive dominant	2		ARMS-mediated activation, Activated TLR4 signalling, Axon guidance, Cytokine Signaling in Immune system, DAP12 interactions, DAP12 signaling, Developmental Biology, Downstream signal transduction, Downstream signaling of activated FGFR1, Downstream signaling of activated FGFR2, Downstream signaling of activated FGFR3, Downstream signaling of activated FGFR4, FCERI mediated MAPK activation, FRS-me…
7	Cyclin_B1	FoxM1	0.4941	0.50521	0.51708	0.28184	0.23	0.25274	0.38309	0.40498	0.55417	0.46608	0.26873		10	0.396184	Positive dominant	6		Cell Cycle, Cell Cycle, Mitotic, Cyclin A/B1 associated events during G2/M transition, G2/M Transition, Mitotic G2-G2/M phases, Polo-like kinase mediated events
8	EGFR_pY1068	HER2_pY1248	0.31395	0.34007	0.36732	0.39034	0.46168	0.28234	0.27041	0.57966	0.4967	0.45412	0.37747		10	0.394005	Positive dominant	2		ARMS-mediated activation, Adaptive Immune System, Axon guidance, Constitutive Signaling by Aberrant PI3K in Cancer, Cytokine Signaling in Immune system, DAP12 interactions, DAP12 signaling, Developmental Biology, Disease, Diseases of signal transduction, Downstream signal transduction, Downstream signaling events of B Cell Receptor (BCR), Downstream signaling of activated FGFR1, Downstream signal…
9	MYH11	Rictor	0.37465	0.21508	0.51454	0.56342	0.52344	0.26837	0.27149	0.19057	0.39602	0.45353	0.24312		9	0.36493	Positive dominant	5		Signal Transduction
10	14.3.3_beta	ARHI	0.39469	0.22035	0.18589	0.34438	0.36754	0.47251	0.46274	0.46611	0.23761	0.26372	0.47274		6	0.35348	Positive dominant	4		NA
11	ETS.1	PEA15_pS116	0.24382	0.18088	0.41433	0.30958	0.11522	0.5255	0.48225	0.31647	0.4068	0.53531	0.29638		9	0.347867	Positive dominant	1		NA
12	beta.Catenin	E.Cadherin	0.60544	0.28989	0.24796	0.44017	0.15962	0.30991	0.42033	0.12882	0.36063	0.34249	0.47205		9	0.343392	Positive dominant	3		Adherens junctions interactions, Apoptosis, Apoptotic cleavage of cell adhesion proteins, Apoptotic cleavage of cellular proteins, Apoptotic execution phase, Cell junction organization, Cell-Cell communication, Cell-cell junction organization, Immune System, Programmed Cell Death, RHO GTPase Effectors, RHO GTPases activate IQGAPs, Signal Transduction, Signaling by Rho GTPases
13	Akt_pS473	GSK3.alpha.beta_pS21_S9	0.39035	0.25692	0.34471	0.43077	0	0.36251	0.39658	0.34895	0.32667	0.28539	0.52496		4	0.333437	Positive dominant	2		AKT phosphorylates targets in the cytosol, Adaptive Immune System, Constitutive Signaling by AKT1 E17K in Cancer, DAP12 interactions, DAP12 signaling, Developmental Biology, Disease, Diseases of signal transduction, Downstream signal transduction, Downstream signaling events of B Cell Receptor (BCR), Downstream signaling of activated FGFR1, Downstream signaling of activated FGFR2, Downstream sign…
14	ACVRL1	ARHI	0.36582	0.51481	0.20917	0.48768	0.40373	0.40637	0.39446	0.33373	0	0.26964	0.27988		6	0.333208	Positive dominant	4		NA
15	Mre11	Stathmin	0.36488	0.24594	0.18908	0.43933	0.4753	0.2626	0.26608	0.31325	0.47105	0.33671	0.2681		8	0.330211	Positive dominant	1		NA
16	YAP	YAP_pS127	0.36615	0.49679	0.39489	0.45281	0.19222	0.20699	0.19549	0.15132	0.31999	0.26908	0.43562		8	0.316486	Positive dominant	Linker, 5 and 6		NA
17	mTOR	Tuberin	0.28278	0.16517	0.15799	0.20861	0.4739	0.40362	0.35862	0.38785	0.32502	0.29176	0.42383		9	0.316286	Positive dominant	3		Adaptive Immune System, Cellular responses to stress, Constitutive Signaling by AKT1 E17K in Cancer, DAP12 interactions, DAP12 signaling, Disease, Diseases of signal transduction, Downstream signal transduction, Downstream signaling events of B Cell Receptor (BCR), Downstream signaling of activated FGFR1, Downstream signaling of activated FGFR2, Downstream signaling of activated FGFR3, Downstream…
18	14.3.3_beta	N.Ras	0.32896	0.21162	0.26964	0.31076	0.20713	0.43823	0.33108	0.41043	0.36136	0.34753	0.21157		9	0.311665	Positive dominant	4		ARMS-mediated activation, Adaptive Immune System, Axon guidance, Cytokine Signaling in Immune system, DAP12 interactions, DAP12 signaling, Developmental Biology, Downstream signal transduction, Downstream signaling of activated FGFR1, Downstream signaling of activated FGFR2, Downstream signaling of activated FGFR3, Downstream signaling of activated FGFR4, FCERI mediated MAPK activation, FRS-media…
19	c.Met_pY1235	Stathmin	0.22435	0.18543	0	0.2609	0.34398	0.34348	0.24199	0.53761	0.51953	0.51549	0.24591		2	0.310788	Positive dominant	1		NA
20	RBM15	Tuberin	0.27834	0.31905	0.16469	0.56663	0.47521	0.30114	0.27455	0.24518	0.47342	0.27655	0		5	0.306796	Positive dominant	3		NA
21	PDK1	PDK1_pS241	0.57278	0.25721	0.56882	0.4686	0.40577	0.26654	0.36233	0.47409	-0.09401	0.07214	0		8	0.304934	Positive dominant	3		NA
22	GSK3.alpha.beta_pS21_S9	Tuberin_pT1462	0.31083	0.25645	0.46278	0.45151	0.22955	0.2535	0.30438	0.35163	0.23586	0.28891	0.19509		7	0.303681	Positive dominant	2		AKT phosphorylates targets in the cytosol, Adaptive Immune System, Cellular responses to stress, Constitutive Signaling by AKT1 E17K in Cancer, DAP12 interactions, DAP12 signaling, Disease, Diseases of signal transduction, Downstream signal transduction, Downstream signaling events of B Cell Receptor (BCR), Downstream signaling of activated FGFR1, Downstream signaling of activated FGFR2, Downstre…
23	Akt_pS473	GSK3_pS9	0.23653	0.23338	0.37976	0.3332	0.14355	0.39079	0.41028	0.31141	0.27021	0.35973	0.23709		8	0.300539	Positive dominant	2		AKT phosphorylates targets in the cytosol, Adaptive Immune System, Constitutive Signaling by AKT1 E17K in Cancer, DAP12 interactions, DAP12 signaling, Developmental Biology, Disease, Diseases of signal transduction, Downstream signal transduction, Downstream signaling events of B Cell Receptor (BCR), Downstream signaling of activated FGFR1, Downstream signaling of activated FGFR2, Downstream sign…
24	HER2	HER2_pY1248	0.69016	0.55006	0.65713	0.37418	0.36338	0.23537	0.2567	0.10506	0.0716	0	0		5	0.300331	Positive dominant	Linker, 1 and 2		NA
25	CD31	N.Ras	0.25502	0.31768	0.41795	0.47098	0.39448	0.35063	0.24722	0.23593	0	0	0.57309		2	0.296635	Positive dominant	4		Cell surface interactions at the vascular wall, Hemostasis
26	B.Raf	mTOR	0.21493	0.18529	0	0.47437	0.25897	0.38421	0.28737	0.31919	0.31886	0.28089	0.46155		2	0.289603	Positive dominant	3		DAP12 interactions, DAP12 signaling, Downstream signal transduction, Downstream signaling of activated FGFR1, Downstream signaling of activated FGFR2, Downstream signaling of activated FGFR3, Downstream signaling of activated FGFR4, Fc epsilon receptor (FCERI) signaling, IGF1R signaling cascade, IRS-mediated signalling, IRS-related events triggered by IGF1R, Immune System, Innate Immune System, I…
27	ACC1	FASN	0.31066	0.21259	0.29321	0.29995	0.18858	0.29449	0.27651	0.28338	0.31583	0.22607	0.44571		10	0.286089	Positive dominant	6		Activation of gene expression by SREBF (SREBP), ChREBP activates metabolic gene expression, Fatty Acyl-CoA Biosynthesis, Fatty acid, triacylglycerol, and ketone body metabolism, Integration of energy metabolism, Metabolism, Metabolism of lipids and lipoproteins, Metabolism of vitamins and cofactors, Metabolism of water-soluble vitamins and cofactors, Regulation of cholesterol biosynthesis by SREB…
28	14.3.3_beta	ACVRL1	0.32307	0.19394	0	0.43662	0	0.27944	0.30716	0.35494	0.43512	0.50493	0.30782		7	0.285731	Positive dominant	4		NA
29	ARHI	N.Ras	0.36861	0.31791	0.33772	0.3178	0.22551	0.27293	0.34559	0.22454	0.22765	0.20467	0.21752		4	0.278223	Positive dominant	4		NA
30	GSK3.alpha.beta_pS21_S9	PKC.pan_BetaII_pS660	0.1997	0.22012	0.23726	0.2213	0.29154	0.26972	0.2996	0.29618	0.40995	0.29798	0.30627		2	0.277238	Positive dominant	2		Adaptive Immune System, Downstream signaling events of B Cell Receptor (BCR), Immune System, Signal Transduction, Signaling by Wnt, Signaling by the B Cell Receptor (BCR)
31	B.Raf	Tuberin	0.42585	0	0	0.25316	0.46126	0.25905	0.34522	0.34236	0.30668	0.33939	0.28813		2	0.274645	Positive dominant	3		DAP12 interactions, DAP12 signaling, Downstream signal transduction, Downstream signaling of activated FGFR1, Downstream signaling of activated FGFR2, Downstream signaling of activated FGFR3, Downstream signaling of activated FGFR4, Fc epsilon receptor (FCERI) signaling, IGF1R signaling cascade, IRS-mediated signalling, IRS-related events triggered by IGF1R, Immune System, Innate Immune System, I…
32	Ku80	Tuberin	0.26241	0.17643	0.38409	0.3099	0	0.34249	0.29744	0.19592	0.35379	0.32189	0.37179		2	0.274195	Positive dominant	3		Disease, Immune System, Innate Immune System
33	STAT5.alpha	Tuberin	0.1835	0.16169	0.2026	0.25456	0.17086	0.31172	0.29767	0.22909	0.43117	0.39414	0.37495		8	0.273814	Positive dominant	3		Disease, Diseases of signal transduction, Downstream signal transduction, Immune System, Signal Transduction, Signaling by ERBB4, Signaling by PDGF, Signaling by SCF-KIT
34	Akt_pS473	Tuberin_pT1462	0.20598	0.21063	0.43212	0.22685	0.16631	0.26775	0.27616	0.2903	0.34479	0.2822	0.26765		8	0.270067	Positive dominant	2		AKT phosphorylates targets in the cytosol, Adaptive Immune System, Constitutive Signaling by AKT1 E17K in Cancer, DAP12 interactions, DAP12 signaling, Disease, Diseases of signal transduction, Downstream signal transduction, Downstream signaling events of B Cell Receptor (BCR), Downstream signaling of activated FGFR1, Downstream signaling of activated FGFR2, Downstream signaling of activated FGFR…
35	Akt	Tuberin	0.19146	0.08811	0.06357	0.19104	0.28383	0.24084	0.24622	0.29292	0.36436	0.42519	0.53438		5	0.265629	Positive dominant	3		AKT phosphorylates targets in the cytosol, Adaptive Immune System, Constitutive Signaling by AKT1 E17K in Cancer, DAP12 interactions, DAP12 signaling, Disease, Diseases of signal transduction, Downstream signal transduction, Downstream signaling events of B Cell Receptor (BCR), Downstream signaling of activated FGFR1, Downstream signaling of activated FGFR2, Downstream signaling of activated FGFR…
36	mTOR	STAT5.alpha	0.37044	0.10009	0	0.2555	0.43841	0.30272	0.2878	0.26461	0.29141	0.30448	0.30585		2	0.265574	Positive dominant	3		Disease, Diseases of signal transduction, Downstream signal transduction, Immune System, Signal Transduction, Signaling by ERBB4, Signaling by PDGF, Signaling by SCF-KIT
37	Akt	mTOR	0.20325	0.07262	0.20548	0.24289	0.13804	0.29399	0.44315	0.30432	0.31306	0.32945	0.35924		4	0.264135	Positive dominant	3		Adaptive Immune System, CD28 co-stimulation, CD28 dependent PI3K/Akt signaling, Constitutive Signaling by AKT1 E17K in Cancer, Costimulation by the CD28 family, DAP12 interactions, DAP12 signaling, Disease, Diseases of signal transduction, Downstream signal transduction, Downstream signaling events of B Cell Receptor (BCR), Downstream signaling of activated FGFR1, Downstream signaling of activate…
38	B.Raf	eIF4G	0.26798	0.22561	0.21898	0.29484	0.19305	0.28672	0.31054	0.14935	0.28185	0.34229	0.32089		9	0.262918	Positive dominant	3		Cytokine Signaling in Immune system, IGF1R signaling cascade, IRS-mediated signalling, IRS-related events triggered by IGF1R, Immune System, Insulin receptor signalling cascade, Signal Transduction, Signaling by Insulin receptor, Signaling by Type 1 Insulin-like Growth Factor 1 Receptor (IGF1R)
39	c.Met_pY1235	Mre11	0.3417	0.26745	0.13795	0.03026	0.22886	0.2732	0.33696	0.37197	0.29251	0.26201	0.34355		4	0.262402	Positive dominant	1		NA
40	B.Raf	RBM15	0.45101	0.34628	0.10048	0.52568	0	0	0.46175	0	0.24048	0.3071	0.45182		1	0.262236	Positive dominant	3		NA
41	53BP1	RBM15	0.40853	0.19085	0.18882	0.33715	0.26046	0.29653	0.3193	0.37018	0.20926	0.29443	0		7	0.26141	Positive dominant	3		NA
42	GSK3_pS9	Tuberin_pT1462	0.3168	0.29764	0.3755	0.20553	0.22589	0.25832	0.28576	0.28303	0.27726	0.26908	0.07635		7	0.261015	Positive dominant	2		AKT phosphorylates targets in the cytosol, Adaptive Immune System, Cellular responses to stress, Constitutive Signaling by AKT1 E17K in Cancer, DAP12 interactions, DAP12 signaling, Disease, Diseases of signal transduction, Downstream signal transduction, Downstream signaling events of B Cell Receptor (BCR), Downstream signaling of activated FGFR1, Downstream signaling of activated FGFR2, Downstre…
43	CD31	Mre11	0.25665	0.21753	0.24216	0.50746	0	0.57321	0.2876	0.28056	0	0.49692	0		2	0.26019	Positive dominant	Linker, 1 and 4		NA
44	Bap1.c.4	RBM15	0.23239	0.19975	0.12989	0.3578	0.07359	0.57836	0.35748	0.31853	0.11294	0.24256	0.24911		4	0.259309	Positive dominant	3		NA
45	GSK3_pS9	NF.kB.p65_pS536	0.41368	0.18689	0.24536	0.02349	0.42252	0.20647	0.47086	0	0.29917	0.25606	0.30231		1	0.256983	Positive dominant	2		Adaptive Immune System, Cellular responses to stress, Developmental Biology, Disease, Downstream signaling events of B Cell Receptor (BCR), Fc epsilon receptor (FCERI) signaling, Immune System, Innate Immune System, Signal Transduction, Signaling by the B Cell Receptor (BCR), Signalling by NGF
46	14.3.3_beta	CD31	0.25637	0.19435	0.21073	0.45758	0	0.3161	0.44037	0	0.22272	0.22073	0.48932		1	0.255297	Positive dominant	4		NA
47	53BP1	Ku80	0.19085	0.15201	0.20028	0.36474	0.07401	0.31786	0.29025	0.3405	0.22219	0.366	0.26969		7	0.253489	Positive dominant	3		DNA Double-Strand Break Repair, DNA Repair, Nonhomologous End-Joining (NHEJ)
48	53BP1	Tuberin	0.22754	0.1546	0.16213	0.26941	0.17221	0.33103	0.35397	0.33059	0.06245	0.36183	0.35122		4	0.252453	Positive dominant	3		NA
49	ACVRL1	N.Ras	0.32217	0.2944	0.2316	0	0.30314	0.28347	0.21098	0.25904	0.26029	0.35205	0.25733		4	0.252225	Positive dominant	4		NA
50	53BP1	p70S6K	0	0	0.07107	0.58635	0.36028	0.24643	0.28652	0.28407	0.27675	0.14291	0.50374		1	0.250738	Positive dominant	3		NA
51	beta.Catenin	mTOR	0.38084	0.23397	0	0.22982	0.1896	0.51292	0.46395	0.25816	0.25143	0.22825	0		1	0.249904	Positive dominant	3		Disease, Diseases of signal transduction, Immune System, Innate Immune System, Signal Transduction, Signaling by VEGF, VEGFA-VEGFR2 Pathway, VEGFR2 mediated vascular permeability
52	Bad_pS112	GSK3.alpha.beta_pS21_S9	0.21043	0.22781	0.24534	0.27655	0.24576	0.21477	0.53481	0.17363	0.10251	0.21963	0.2508		3	0.24564	Positive dominant	2		AKT phosphorylates targets in the cytosol, Adaptive Immune System, Constitutive Signaling by AKT1 E17K in Cancer, DAP12 interactions, DAP12 signaling, Disease, Diseases of signal transduction, Downstream signal transduction, Downstream signaling events of B Cell Receptor (BCR), Downstream signaling of activated FGFR1, Downstream signaling of activated FGFR2, Downstream signaling of activated FGFR…
53	53BP1	eIF4G	0.36338	0.16259	0.11145	0.27287	0	0.36039	0.37421	0.2801	0.21745	0.29489	0.25016		4	0.244317	Positive dominant	3		NA
54	Bad_pS112	GSK3_pS9	0.20373	0.26613	0.26643	0.27766	0.37652	0.24082	0.28045	0	0.14058	0.24938	0.3693		1	0.242818	Positive dominant	2		AKT phosphorylates targets in the cytosol, Adaptive Immune System, Constitutive Signaling by AKT1 E17K in Cancer, DAP12 interactions, DAP12 signaling, Disease, Diseases of signal transduction, Downstream signal transduction, Downstream signaling events of B Cell Receptor (BCR), Downstream signaling of activated FGFR1, Downstream signaling of activated FGFR2, Downstream signaling of activated FGFR…
55	HSP70	Mre11	0.24008	0.22337	0.08797	0.35921	0.257	0.20681	0.24629	0.23502	0.32316	0.24885	0.23475		4	0.242046	Positive dominant	1		Cellular responses to stress
56	Bap1.c.4	eIF4G	0.20069	0.19895	0.2759	0.27501	0.08349	0.47033	0.38541	0	0.23534	0.25851	0.23946		6	0.238463	Positive dominant	3		NA
57	Akt_pS473	MAPK_pT202_Y204	0.22169	0.27027	0.40247	0.23367	0.25064	0.26338	0.34173	0.11048	0.26236	0.15288	0.11318		5	0.238432	Positive dominant	2		DAP12 interactions, DAP12 signaling, Developmental Biology, Downstream signal transduction, Downstream signaling of activated FGFR1, Downstream signaling of activated FGFR2, Downstream signaling of activated FGFR3, Downstream signaling of activated FGFR4, Fc epsilon receptor (FCERI) signaling, Gene Expression, Hemostasis, IGF1R signaling cascade, IRS-mediated signalling, IRS-related events trigge…
58	Ku80	STAT5.alpha	0.19742	0.06934	0.08598	0.22074	0.38055	0.5311	0.19818	0	0.32371	0.33135	0.27179		1	0.237287	Positive dominant	3		Disease, Immune System
59	eIF4G	RBM15	0.37519	0.19034	0.11989	0.29658	0.15971	0.30814	0.32298	0.27941	0.22494	0.33037	0		3	0.23705	Positive dominant	3		NA
60	Src_pY416	Src_pY527	0.16384	0.22389	0.26292	0.28257	0.25422	0.20936	0.23197	0.1597	0.29127	0.33861	0.18504		7	0.236672	Positive dominant	2		NA
61	GSK3_pS9	PKC.pan_BetaII_pS660	0.17032	0.20901	0.23856	0.19695	0.23375	0.24217	0.28349	0.16602	0.29407	0.28922	0.26624		5	0.235436	Positive dominant	2		Adaptive Immune System, Downstream signaling events of B Cell Receptor (BCR), Immune System, Signal Transduction, Signaling by Wnt, Signaling by the B Cell Receptor (BCR)
62	GSK3.alpha.beta_pS21_S9	NF.kB.p65_pS536	0.21287	0.18226	0.22951	0.02792	0.47671	0.2875	0.23205	0	0.33827	0.26576	0.32139		4	0.234022	Positive dominant	2		Adaptive Immune System, Cellular responses to stress, Developmental Biology, Disease, Downstream signaling events of B Cell Receptor (BCR), Fc epsilon receptor (FCERI) signaling, Immune System, Innate Immune System, Signal Transduction, Signaling by the B Cell Receptor (BCR), Signalling by NGF
63	Bid	Mre11	0.19605	0.30442	0.15048	0.26882	0.40421	0.10341	0.22403	0.2924	0.21684	0.2523	0.15264		7	0.233236	Positive dominant	1		NA
64	mTOR	RBM15	0.2742	0.21808	0	0.29016	0.2055	0.29338	0.20145	0.31568	0.26277	0.23135	0.26921		1	0.232889	Positive dominant	3		NA
65	Fibronectin	PAI.1	0.1883	0.28798	0.23992	0.18549	0.15092	0.25899	0.26567	0.24714	0.26943	0.25129	0.21084		8	0.232361	Positive dominant	Linker, 1 and 5		Extracellular matrix organization, Hemostasis, Platelet activation, signaling and aggregation, Response to elevated platelet cytosolic Ca2+, Signal Transduction
66	Fibronectin	p21	0.24252	0.22557	0.1495	0.36759	0.22982	0.22735	0.25349	0.22445	0.18264	0.17955	0.26094		7	0.23122	Positive dominant	1		DAP12 interactions, DAP12 signaling, Downstream signal transduction, Downstream signaling of activated FGFR1, Downstream signaling of activated FGFR2, Downstream signaling of activated FGFR3, Downstream signaling of activated FGFR4, Fc epsilon receptor (FCERI) signaling, Immune System, Innate Immune System, NGF signalling via TRKA from the plasma membrane, Signal Transduction, Signaling by EGFR, …
67	SCD1	SF2	0.1779	0	0.28827	0.33218	0.18098	0.27879	0.31133	0.1355	0.29428	0.27004	0.26888		7	0.230741	Positive dominant	4		NA
68	Bad_pS112	PKC.pan_BetaII_pS660	0.16992	0.19989	0.2398	0.44181	0.29188	0.18177	0.28826	0	0.24778	0.20179	0.25383		5	0.228794	Positive dominant	2		Adaptive Immune System, Downstream signaling events of B Cell Receptor (BCR), Immune System, Signal Transduction, Signaling by the B Cell Receptor (BCR)
69	Ku80	mTOR	0.30619	0.25783	0	0.21042	0.10442	0.27067	0.2614	0.3329	0.23469	0.27626	0.25867		2	0.228495	Positive dominant	3		Disease, Immune System, Innate Immune System
70	Heregulin	N.Ras	0.28179	0.22708	0.39558	0.27849	0.15163	0.27627	0.34794	0.2755	0.21999	0.05703	0		5	0.2283	Positive dominant	4		ARMS-mediated activation, Adaptive Immune System, Axon guidance, Cytokine Signaling in Immune system, DAP12 interactions, DAP12 signaling, Developmental Biology, Disease, Diseases of signal transduction, Downstream signal transduction, Downstream signaling events of B Cell Receptor (BCR), Downstream signaling of activated FGFR1, Downstream signaling of activated FGFR2, Downstream signaling of act…
71	EGFR_pY1068	Shc_pY317	0.26405	0.28002	0.35416	0.20867	0.27243	0.11748	0.26379	0.19262	0.21417	0.2004	0.13571		7	0.227591	Positive dominant	2		ARMS-mediated activation, Adaptive Immune System, Axon guidance, Constitutive Signaling by EGFRvIII, Constitutive Signaling by Ligand-Responsive EGFR Cancer Variants, Cytokine Signaling in Immune system, DAP12 interactions, DAP12 signaling, Developmental Biology, Disease, Diseases of signal transduction, Downstream signal transduction, Downstream signaling of activated FGFR1, Downstream signaling…
72	Ku80	RBM15	0.28071	0.15091	0.21694	0.2833	0.09481	0.30511	0.31101	0.28225	0.20112	0.30745	0.05837		7	0.226544	Positive dominant	3		NA
73	53BP1	B.Raf	0.19215	0.20652	0.18161	0.30836	0.24732	0.32732	0.27576	0	0.26524	0.24226	0.23693		4	0.22577	Positive dominant	3		NA
74	ACC_pS79	FASN	0.24524	0.17396	0.27724	0.27472	0.17925	0.27733	0.2338	0.24122	0.14647	0.20866	0.20862		3	0.224228	Positive dominant	6		Activation of gene expression by SREBF (SREBP), ChREBP activates metabolic gene expression, Fatty Acyl-CoA Biosynthesis, Fatty acid, triacylglycerol, and ketone body metabolism, Integration of energy metabolism, Metabolism, Metabolism of lipids and lipoproteins, Metabolism of vitamins and cofactors, Metabolism of water-soluble vitamins and cofactors, Regulation of cholesterol biosynthesis by SREB…
75	Akt_pS473	PRAS40_pT246	0.23793	0.19186	0.22732	0.41815	0	0.44786	0.22582	0.22356	0	0.2506	0.24147		4	0.224052	Positive dominant	2		AKT phosphorylates targets in the cytosol, Adaptive Immune System, Constitutive Signaling by AKT1 E17K in Cancer, DAP12 interactions, DAP12 signaling, Disease, Diseases of signal transduction, Downstream signal transduction, Downstream signaling events of B Cell Receptor (BCR), Downstream signaling of activated FGFR1, Downstream signaling of activated FGFR2, Downstream signaling of activated FGFR…
76	53BP1	Bap1.c.4	0.16938	0.31228	0.18887	0.25508	0	0.36694	0.35016	0.28708	0.08062	0.13964	0.31096		4	0.223728	Positive dominant	3		NA
77	53BP1	eEF2K	0.26928	0	0.08464	0.43754	0	0.57347	0.3147	0.21721	0	0.26769	0.26703		1	0.221051	Positive dominant	3		NA
78	ATM	STAT5.alpha	0.20044	0.02119	0	0.2274	0.25292	0.27465	0.22855	0.27765	0.37525	0.32813	0.24136		3	0.220685	Positive dominant	3		NA
79	eIF4G	Tuberin	0.45452	0	0.11447	0.46085	0	0.36505	0.35837	0.17357	0	0.15919	0.32847		2	0.219499	Positive dominant	3		Gene Expression, IGF1R signaling cascade, IRS-mediated signalling, IRS-related events triggered by IGF1R, Immune System, Insulin receptor signalling cascade, PI3K Cascade, PKB-mediated events, Signal Transduction, Signaling by Insulin receptor, Signaling by Type 1 Insulin-like Growth Factor 1 Receptor (IGF1R), mTOR signalling
80	Akt_pT308	Tuberin_pT1462	0.18322	0.23426	0.33368	0.22233	0.25289	0.25179	0.26822	0.22252	0.08519	0.25682	0.09884		8	0.219069	Positive dominant	2		AKT phosphorylates targets in the cytosol, Adaptive Immune System, Constitutive Signaling by AKT1 E17K in Cancer, DAP12 interactions, DAP12 signaling, Disease, Diseases of signal transduction, Downstream signal transduction, Downstream signaling events of B Cell Receptor (BCR), Downstream signaling of activated FGFR1, Downstream signaling of activated FGFR2, Downstream signaling of activated FGFR…
81	eIF4G	p70S6K	0.22523	0	0	0.34583	0.20839	0.35718	0.31648	0.23302	0.18941	0.23976	0.29441		2	0.219065	Positive dominant	3		IGF1R signaling cascade, IRS-mediated signalling, IRS-related events triggered by IGF1R, Insulin receptor signalling cascade, PI3K Cascade, PKB-mediated events, Signal Transduction, Signaling by Insulin receptor, Signaling by Type 1 Insulin-like Growth Factor 1 Receptor (IGF1R), mTOR signalling, mTORC1-mediated signalling
82	mTOR	mTOR_pS2448	0.25657	0.23888	0.20072	0.07214	0.30431	0.21079	0.14001	0.25444	0.33856	0.10894	0.26873		3	0.217645	Positive dominant	Linker, 2 and 3		NA
83	N.Ras	Smad4	0.22391	0	0.18066	0.24004	0	0.29179	0.21494	0.24695	0.2156	0.23909	0.50926		5	0.214749	Positive dominant	4		Developmental Biology, Disease, Diseases of signal transduction, Signal Transduction
84	CD20	Cyclin_D1	0.18954	0.33763	0.21847	0	0.20644	0.05351	0.22507	0.39841	0.22734	0.29288	0.21244		5	0.214703	Positive dominant	1		NA
85	Caveolin.1	Collagen_VI	0.29563	0.22101	0	0.5063	0.24822	0.27697	0.22857	0.30319	0.09441	0.15835	0		5	0.212059	Positive dominant	5		Signal Transduction
86	FOXO3a	N.Ras	0.18544	0	0	0.23881	0.11698	0.326	0.39986	0.31588	0.5054	0.24085	0		2	0.211747	Positive dominant	4		Adaptive Immune System, DAP12 interactions, DAP12 signaling, Developmental Biology, Disease, Diseases of signal transduction, Downstream signal transduction, Downstream signaling events of B Cell Receptor (BCR), Downstream signaling of activated FGFR1, Downstream signaling of activated FGFR2, Downstream signaling of activated FGFR3, Downstream signaling of activated FGFR4, Fc epsilon receptor (FC…
87	4E.BP1_pT37T46	Rb_pS807_S811	0.16859	0.17155	0.24053	0.31251	0.14878	0.3368	0.22822	0.24844	0.11377	0.1786	0.18082		6	0.211692	Positive dominant	2		NA
88	beta.Catenin	RBM15	0.23971	0.17972	0.16612	0.30998	0.48919	0.3716	0.29809	0	0	0.23447	0		2	0.20808	Positive dominant	3		NA
89	S6_pS235_S236	YB.1_pS102	0.18577	0.17706	0.24369	0.17322	0.21377	0.28488	0.29971	0	0.24798	0.21078	0.2478		7	0.207696	Positive dominant	2		Gene Expression
90	14.3.3_beta	FOXO3a	0.18328	0	0	0.45921	0	0.3579	0.32964	0.36616	0.30893	0.2455	0		5	0.204602	Positive dominant	4		Adaptive Immune System, DAP12 interactions, DAP12 signaling, Developmental Biology, Downstream signal transduction, Downstream signaling of activated FGFR1, Downstream signaling of activated FGFR2, Downstream signaling of activated FGFR3, Downstream signaling of activated FGFR4, Fc epsilon receptor (FCERI) signaling, Immune System, Innate Immune System, MAPK family signaling cascades, NGF signall…
91	eEF2K	eIF4G	0.10378	0.06786	0.25546	0.24475	0.42668	0.31738	0.32398	0	0	0.2021	0.29044		5	0.202948	Positive dominant	3		IGF1R signaling cascade, IRS-mediated signalling, IRS-related events triggered by IGF1R, Insulin receptor signalling cascade, PI3K Cascade, PKB-mediated events, Signal Transduction, Signaling by Insulin receptor, Signaling by Type 1 Insulin-like Growth Factor 1 Receptor (IGF1R), mTOR signalling, mTORC1-mediated signalling
92	14.3.3_epsilon	Stathmin	0.19729	0	0.35706	0	0.24887	0.227	0.24333	0	0	0.49216	0.46522		1	0.202812	Positive dominant	Linker, 1 and 4		NA
93	EGFR_pY1173	HER3_pY1289	0.2103	0.15823	0.16232	0.47584	0	0.51063	0.18452	0	0.51977	0	0		2	0.201965	Positive dominant	1		ARMS-mediated activation, Adaptive Immune System, Axon guidance, Constitutive Signaling by Aberrant PI3K in Cancer, Cytokine Signaling in Immune system, DAP12 interactions, DAP12 signaling, Developmental Biology, Disease, Diseases of signal transduction, Downstream signal transduction, Downstream signaling events of B Cell Receptor (BCR), Downstream signaling of activated FGFR1, Downstream signal…
94	53BP1	beta.Catenin	0.28077	0.20677	0.15679	0.28692	0.10859	0.2969	0.28879	0	0	0.3292	0.25849		5	0.201202	Positive dominant	3		NA
95	53BP1	Akt	0.37858	0	0	0	0	0.45152	0.27119	0.33776	0.16892	0.31801	0.27237		1	0.19985	Positive dominant	3		NA
96	GSK3_pS9	PRAS40_pT246	0.26694	0.26789	0.31087	0.18571	0	0.24358	0.31074	0.2536	0	0.14199	0.21303		4	0.199486	Positive dominant	2		AKT phosphorylates targets in the cytosol, Adaptive Immune System, Cellular response to heat stress, Cellular responses to stress, Constitutive Signaling by AKT1 E17K in Cancer, DAP12 interactions, DAP12 signaling, Disease, Diseases of signal transduction, Downstream signal transduction, Downstream signaling events of B Cell Receptor (BCR), Downstream signaling of activated FGFR1, Downstream sign…
97	14.3.3_epsilon	N.Ras	0.24889	0.09599	0.26616	0.28339	0	0.27901	0.20558	0	0.31403	0.27495	0.21883		2	0.198803	Positive dominant	4		Signal Transduction, Signalling by NGF
98	Bap1.c.4	S6	0.29243	0.08825	0.1188	0.52304	0.18563	0.30556	0.22977	0.20142	0.12321	0.10401	0		1	0.197465	Positive dominant	Linker, 3 and 6		NA
99	MEK1_pS217_S221	p38_pT180_Y182	0.18673	0.26283	0.30196	0.12604	0.19517	0.30656	0.25198	0.10318	0.08815	0.22332	0.12491		4	0.197348	Positive dominant	2		Activated TLR4 signalling, Developmental Biology, Immune System, Innate Immune System, MAP kinase activation in TLR cascade, MyD88 cascade initiated on plasma membrane, MyD88 dependent cascade initiated on endosome, MyD88:Mal cascade initiated on plasma membrane, NGF signalling via TRKA from the plasma membrane, Signal Transduction, Signaling by VEGF, Signalling by NGF, Signalling to ERKs, Signal…
100	14.3.3_epsilon	Smad4	0.26589	0.06852	0.14303	0.23149	0.216	0.23567	0.20079	0	0.25576	0.2754	0.26467		4	0.196111	Positive dominant	4		Gene Expression, Generic Transcription Pathway, Signal Transduction
101	GSK3.alpha.beta_pS21_S9	PRAS40_pT246	0.23413	0.29273	0.32257	0	0	0.23536	0.30508	0.23516	0	0.27642	0.23434		6	0.194163	Positive dominant	2		AKT phosphorylates targets in the cytosol, Adaptive Immune System, Cellular response to heat stress, Cellular responses to stress, Constitutive Signaling by AKT1 E17K in Cancer, DAP12 interactions, DAP12 signaling, Disease, Diseases of signal transduction, Downstream signal transduction, Downstream signaling events of B Cell Receptor (BCR), Downstream signaling of activated FGFR1, Downstream sign…
102	beta.Catenin	Ku80	0.40385	0	0	0.2548	0	0.26979	0.31956	0	0	0.33991	0.54774		1	0.19415	Positive dominant	3		Disease, Immune System, Innate Immune System
103	NF.kB.p65_pS536	STAT5.alpha	0.17066	0.09316	0.21526	0.11678	0.16811	0.25157	0.27755	0.07413	0.26015	0.27879	0.22176		4	0.193447	Positive dominant	Linker, 2 and 3		Cytokine Signaling in Immune system, Disease, Immune System, Signal Transduction, Signaling by Interleukins
104	14.3.3_beta	14.3.3_epsilon	0.24683	0	0.18978	0.21942	0.27112	0.31816	0	0	0.32785	0.26338	0.27488		2	0.191947	Positive dominant	4		Activation of BH3-only proteins, Apoptosis, Cell Cycle, Cell Cycle Checkpoints, Chk1/Chk2(Cds1) mediated inactivation of Cyclin B:Cdk1 complex, G2/M Checkpoints, G2/M DNA damage checkpoint, Gene Expression, Generic Transcription Pathway, Intrinsic Pathway for Apoptosis, Membrane Trafficking, Programmed Cell Death, RHO GTPase Effectors, RHO GTPases activate PKNs, Signal Transduction, Signaling by …
105	MAPK_pT202_Y204	Src_pY527	0.23473	0.17041	0.20926	0.22017	0.24813	0.28336	0.33019	0	0.18329	0.21023	0		5	0.189979	Positive dominant	2		ARMS-mediated activation, Axon guidance, Cytokine Signaling in Immune system, DAP12 interactions, DAP12 signaling, Developmental Biology, Downstream signal transduction, Downstream signaling of activated FGFR1, Downstream signaling of activated FGFR2, Downstream signaling of activated FGFR3, Downstream signaling of activated FGFR4, FCERI mediated MAPK activation, FRS-mediated FGFR1 signaling, FRS…
106	Cyclin_B1	PCNA	0.16884	0.18104	0.25622	0.22668	0	0.22086	0.21379	0.07102	0.2786	0.2746	0.19324		6	0.189535	Positive dominant	6		Cell Cycle, Cell Cycle, Mitotic, E2F mediated regulation of DNA replication, G1/S Transition, Mitotic G1-G1/S phases
107	PRAS40_pT246	Tuberin_pT1462	0.21709	0.26535	0.32692	0.08406	0	0	0.16338	0.25906	0.26683	0.25279	0.24198		6	0.18886	Positive dominant	2		AKT phosphorylates targets in the cytosol, Adaptive Immune System, Cellular responses to stress, Constitutive Signaling by AKT1 E17K in Cancer, DAP12 interactions, DAP12 signaling, Disease, Diseases of signal transduction, Downstream signal transduction, Downstream signaling events of B Cell Receptor (BCR), Downstream signaling of activated FGFR1, Downstream signaling of activated FGFR2, Downstre…
108	beta.Catenin	eIF4G	0.42111	0.3127	0	0.25575	0	0	0.48018	0.07163	0	0.25989	0.27367		2	0.18863	Positive dominant	3		Immune System, Metabolism of proteins, Signal Transduction
109	Src_pY527	Tuberin_pT1462	0	0.21941	0.32093	0	0	0.22537	0.30243	0.2093	0.49251	0.20414	0.06095		1	0.185004	Positive dominant	2		Adaptive Immune System, DAP12 interactions, DAP12 signaling, Downstream signal transduction, Downstream signaling of activated FGFR1, Downstream signaling of activated FGFR2, Downstream signaling of activated FGFR3, Downstream signaling of activated FGFR4, Fc epsilon receptor (FCERI) signaling, GAB1 signalosome, IGF1R signaling cascade, IRS-mediated signalling, IRS-related events triggered by IGF…
110	53BP1	HER2	0.34668	0	0.20955	0.30298	0	0.17786	0.13232	0	0.25256	0.31434	0.27665		2	0.182995	Positive dominant	Linker, 1 and 3		NA
111	ATM	mTOR	0.17923	0.06857	0.1645	0.0453	0.23801	0.24738	0.14672	0.2292	0.28598	0.21423	0.19049		3	0.182692	Positive dominant	3		Cellular response to heat stress, Cellular responses to stress
112	B.Raf	p70S6K	0.1884	0	0	0.53324	0.3739	0.12951	0.26051	0.16788	0	0.13141	0.20022		1	0.180461	Positive dominant	3		IGF1R signaling cascade, IRS-mediated signalling, IRS-related events triggered by IGF1R, Insulin receptor signalling cascade, Signal Transduction, Signaling by Insulin receptor, Signaling by Type 1 Insulin-like Growth Factor 1 Receptor (IGF1R)
113	eEF2	GAPDH	0.19946	0.12921	0.34114	0.25553	0.10599	0.29407	0.27809	0	0.18827	0.19246	0		6	0.180384	Positive dominant	6		NA
114	Dvl3	eIF4G	0.23296	0.19387	0.17468	0.23744	0.11155	0.18864	0.32226	0.13809	0.07797	0.05869	0.22843		3	0.178598	Positive dominant	3		Signal Transduction
115	Bcl.2	Bim	0.26015	0.20948	0.19538	0.08049	0.22166	0.11783	0	0.23573	0.15842	0.17861	0.29718		3	0.177721	Positive dominant	5		Activation of BH3-only proteins, Apoptosis, BH3-only proteins associate with and inactivate anti-apoptotic BCL-2 members, Intrinsic Pathway for Apoptosis, Programmed Cell Death
116	Bap1.c.4	Ku80	0.22852	0.09277	0.10501	0.2259	0	0.32292	0.31675	0.16662	0	0.15691	0.31497		2	0.175488	Positive dominant	3		NA
117	MAPK_pT202_Y204	p38_pT180_Y182	0.16898	0.35086	0.29215	0	0	0.26042	0.33555	0	0.28101	0.2395	0		3	0.175315	Positive dominant	2		Activated TLR4 signalling, Activation of the AP-1 family of transcription factors, Cellular Senescence, Cellular responses to stress, Developmental Biology, ERK/MAPK targets, Gene Expression, Hemostasis, Immune System, Innate Immune System, MAP kinase activation in TLR cascade, MAPK targets/ Nuclear events mediated by MAP kinases, MyD88 cascade initiated on plasma membrane, MyD88 dependent cascad…
118	B.Raf	Bap1.c.4	0.24943	0.35422	0.17039	0.21145	0	0.31601	0.25852	0	0	0.07501	0.26158		2	0.172419	Positive dominant	3		NA
119	AR	ER.alpha	0.24877	0.17913	0.23633	0.12334	0.10617	0.26411	0.29351	0	0	0.22394	0.21375		6	0.171732	Positive dominant	1		Gene Expression, Generic Transcription Pathway, Nuclear Receptor transcription pathway, Signal Transduction
120	MAPK_pT202_Y204	Tuberin_pT1462	0	0.387	0.37091	0	0	0.18454	0.2814	0	0.15316	0.4641	0		1	0.167374	Positive dominant	2		Cellular responses to stress, DAP12 interactions, DAP12 signaling, Downstream signal transduction, Downstream signaling of activated FGFR1, Downstream signaling of activated FGFR2, Downstream signaling of activated FGFR3, Downstream signaling of activated FGFR4, Fc epsilon receptor (FCERI) signaling, Gene Expression, IGF1R signaling cascade, IRS-mediated signalling, IRS-related events triggered b…
121	Bap1.c.4	FoxM1	0.20867	0.21501	0.17366	0.19807	0.08126	0.28444	0.35098	0	0.06129	0.25239	0		2	0.165979	Positive dominant	Linker, 3 and 6		NA
122	Rictor_pT1135	Tuberin_pT1462	0.18975	0.22933	0	0.20838	0.18702	0.26779	0.07402	0.14869	0.18339	0.22947	0.09859		3	0.16513	Positive dominant	Linker, 2 and 6		Adaptive Immune System, Constitutive Signaling by AKT1 E17K in Cancer, DAP12 interactions, DAP12 signaling, Disease, Diseases of signal transduction, Downstream signal transduction, Downstream signaling events of B Cell Receptor (BCR), Downstream signaling of activated FGFR1, Downstream signaling of activated FGFR2, Downstream signaling of activated FGFR3, Downstream signaling of activated FGFR4,…
123	Akt_pS473	NDRG1_pT346	0.1862	0.20396	0.094	0.12603	0.23986	0.28662	0.28252	0.09726	0.04113	0.19428	0.05296		2	0.164075	Positive dominant	2		NA
124	B.Raf	beta.Catenin	0.16002	0.22103	0.09342	0.25803	0	0.16037	0.17596	0	0.17267	0.29418	0.25787		2	0.16305	Positive dominant	3		Developmental Biology, Immune System, Innate Immune System, Signal Transduction, Signaling by VEGF, VEGFA-VEGFR2 Pathway
125	JNK_pT183_Y185	MEK1_pS217_S221	0	0.36863	0.20561	0	0	0.18798	0.23522	0.0705	0.34117	0.35671	0.00874		1	0.161324	Positive dominant	2		Activated TLR4 signalling, FCERI mediated MAPK activation, Fc epsilon receptor (FCERI) signaling, Immune System, Innate Immune System, MAP kinase activation in TLR cascade, MyD88 cascade initiated on plasma membrane, MyD88 dependent cascade initiated on endosome, MyD88:Mal cascade initiated on plasma membrane, Signal Transduction, Signalling by NGF, TRAF6 mediated induction of NFkB and MAP kinase…
126	ER.alpha	PR	0.26542	0	0.16906	0.49702	0.08503	0.23483	0.25836	0.11499	0	0.12776	0		3	0.159315	Positive dominant	Linker, 1 and 4		Gene Expression, Generic Transcription Pathway, Nuclear Receptor transcription pathway, Nuclear signaling by ERBB4, Signal Transduction, Signaling by ERBB4
127	p90RSK	PKC.pan_BetaII_pS660	0.20027	0.10975	0.10533	0.16813	0.20188	0.21819	0.10066	0.23104	0.25336	0.08035	0.07314		2	0.158373	Positive dominant	Linker, 2 and 3		Immune System, Neuronal System, Neurotransmitter Receptor Binding And Downstream Transmission In The Postsynaptic Cell, Signal Transduction, Signaling by GPCR, Transmission across Chemical Synapses
128	c.Met_pY1235	EGFR_pY1173	0.1707	0.24624	0.20961	0.2144	0.13275	0.15298	0.14936	0	0	0.45811	0		3	0.15765	Positive dominant	1		Axon guidance, Developmental Biology
129	NF.kB.p65_pS536	PKC.pan_BetaII_pS660	0	0.07962	0.18765	0	0	0.28272	0.33004	0	0.29204	0.55407	0		1	0.156922	Positive dominant	2		Activation of NF-kappaB in B cells, Adaptive Immune System, Downstream signaling events of B Cell Receptor (BCR), Immune System, Signal Transduction, Signaling by the B Cell Receptor (BCR)
130	Bad_pS112	PDCD4	0.13634	0.18339	0.19744	0.23448	0.05082	0.19456	0.225	0.03416	0.10506	0.17177	0.18082		3	0.155804	Positive dominant	2		NA
131	MAPK_pT202_Y204	mTOR_pS2448	0	0.40466	0.20827	0.21798	0	0	0.25835	0	0.19182	0.2169	0.09529		1	0.144843	Positive dominant	2		Cellular response to heat stress, Cellular responses to stress, DAP12 interactions, DAP12 signaling, Downstream signal transduction, Downstream signaling of activated FGFR1, Downstream signaling of activated FGFR2, Downstream signaling of activated FGFR3, Downstream signaling of activated FGFR4, Fc epsilon receptor (FCERI) signaling, Gene Expression, IGF1R signaling cascade, IRS-mediated signalli…
132	Chk2	Chk2_pT68	0.23941	0.25934	0.24579	0.09211	0	0.21555	0.12496	-0.0733	0.21127	0.17416	0.10165		2	0.144631	Positive dominant	Linker, 1 and 6		NA
133	GAPDH	TRFC	0.16611	0	0.40355	0.17654	0.11381	0.23218	0.19185	0	0.03102	0.19189	0.04501		1	0.141087	Positive dominant	6		NA
134	Cyclin_B1	Cyclin_E1	0.19409	0.14068	0.17505	0.19343	0	0.21876	0.14396	0.01998	0.23323	0.05015	0.09521		2	0.13314	Positive dominant	6		Cell Cycle, Cell Cycle Checkpoints, Cell Cycle, Mitotic, E2F mediated regulation of DNA replication, G1/S Transition, Mitotic G1-G1/S phases
135	mTOR_pS2448	Src_pY527	0.16438	0.05979	0.25299	0.20647	0	0.06365	0.26244	0	0.18469	0.23156	0		2	0.129634	Positive dominant	2		Adaptive Immune System, CD28 co-stimulation, Costimulation by the CD28 family, DAP12 interactions, DAP12 signaling, Downstream signal transduction, Downstream signaling of activated FGFR1, Downstream signaling of activated FGFR2, Downstream signaling of activated FGFR3, Downstream signaling of activated FGFR4, Fc epsilon receptor (FCERI) signaling, GAB1 signalosome, IGF1R signaling cascade, IRS-m…
136	Akt_pT308	NDRG1_pT346	0.17433	0.34379	0	0	0.11685	0.26441	0.2616	0	0	0.24987	0		1	0.128259	Positive dominant	2		NA
137	FoxM1	Rab.25	0	0	-0.1013	0	0.18725	0	0	0	0	0	-0.06386		1	0.00200818	Negative dominant	Linker, 4 and 6		NA
138	ETS.1	FOXO3a	0	0.08359	0	-0.23135	0.14201	0	0	0	0	0	0		1	-0.000522727	Negative dominant	Linker, 1 and 4		NA
139	ARHI	PRAS40_pT246	0	0	-0.22853	0	0.20321	0	0	0	0	0	0		1	-0.00230182	Negative dominant	Linker, 2 and 4		NA
140	GAPDH	Rictor_pT1135	0	0	0	0	0.10581	0	-0.17859	0	0	0	0		1	-0.00661636	Negative dominant	6		NA
141	BRCA2	Src_pY416	0	0	0	-0.18225	0	0	0	0	0	0	0.06533		1	-0.0106291	Negative dominant	Linker, 1 and 2		NA
142	C.Raf	Collagen_VI	0	0	-0.16312	0	0	0	0	0	0	0	0		1	-0.0148291	Negative dominant	5		Axon guidance, Developmental Biology, NCAM signaling for neurite out-growth, Signal Transduction, Signaling by PDGF
143	Ku80	p38_MAPK	0	0	0	0	0.09953	0	0	0	0	-0.20986	-0.06337		1	-0.0157909	Negative dominant	Linker, 3 and 6		Immune System, Innate Immune System
144	Cyclin_D1	Smad1	0	-0.14744	0	0	0	0	0	-0.02751	0	0	0		1	-0.0159045	Negative dominant	1		Signal Transduction
145	c.Jun_pS73	TSC1	0	0	0	-0.17673	0	0	0	0	0	0	0		1	-0.0160664	Negative dominant	Linker, 2 and 3		Cellular responses to stress, Signal Transduction
146	p70S6K	Rictor_pT1135	0	0	0	-0.1812	0	0	0	0	0	0	0		1	-0.0164727	Negative dominant	Linker, 3 and 6		Signal Transduction
147	Bak	PDCD4	0	-0.18752	0	0	0	0	0	0	0	0	0		1	-0.0170473	Negative dominant	Linker, 1 and 2		NA
148	53BP1	p38_MAPK	0	0	0	0	0	0	0	0	0	-0.21061	0		1	-0.0191464	Negative dominant	Linker, 3 and 6		NA
149	GATA3	TIGAR	0	0	0	0	0	-0.08548	-0.18181	0	0	0.03376	0		1	-0.02123	Negative dominant	1		NA
150	Akt	Cyclin_D1	0	0	0	0	0	0	0	-0.26131	0	0	0		1	-0.0237555	Negative dominant	Linker, 1 and 3		Signal Transduction
151	ER.alpha	Fibronectin	-0.0229	-0.14505	-0.15785	0	0	0	0	0	0	0.05916	0		1	-0.02424	Negative dominant	1		Signal Transduction, Signaling by ERBB4
152	4E.BP1	p70S6K_pT389	0	-0.06347	0	-0.18755	0	0	0	0	-0.0268	0	0		1	-0.0252564	Negative dominant	Linker, 2 and 5		IGF1R signaling cascade, IRS-mediated signalling, IRS-related events triggered by IGF1R, Insulin receptor signalling cascade, PI3K Cascade, PKB-mediated events, Signal Transduction, Signaling by Insulin receptor, Signaling by Type 1 Insulin-like Growth Factor 1 Receptor (IGF1R), mTOR signalling, mTORC1-mediated signalling
153	ETS.1	p90RSK_pT359_S363	0	0	0	0	0	-0.27871	0	0	0	0	0		1	-0.0253373	Negative dominant	Linker, 1 and 2		Cellular Senescence, Cellular responses to stress
154	ETS.1	PI3K.p110.alpha	-0.0228	0	-0.2018	-0.05786	0	0	0	0	0	0	0		1	-0.0256782	Negative dominant	1		NA
155	Cyclin_D1	PI3K.p110.alpha	0	-0.14476	0	0	0	-0.14095	0	0	0	0	0		1	-0.0259736	Negative dominant	1		Signal Transduction
156	ACVRL1	PRAS40_pT246	0	0	-0.27039	-0.24225	0.20237	0	0	0	0	0	0		1	-0.0282064	Negative dominant	Linker, 2 and 4		NA
157	ATM	Claudin.7	0	0	0	0	0	0	0	-0.21477	-0.10685	0	0		1	-0.0292382	Negative dominant	Linker, 3 and 6		NA
158	BRCA2	PEA15_pS116	0	0	-0.35135	-0.16105	0	-0.21391	0	0	0.07066	0.14527	0.18713		1	-0.0293864	Negative dominant	1		NA
159	Claudin.7	PI3K.p85	0	-0.06565	0	0	0	0	0	0	0	-0.19759	-0.06363		1	-0.0297155	Negative dominant	6		Cell-Cell communication
160	Acetyl.a.Tubulin.Lys40	PDK1	0	0	0	-0.02812	0	0	0	0	0	-0.29978	0		1	-0.0298091	Negative dominant	3		NA
161	Paxillin	XRCC1	0	0	0.11181	0	0	0	0	0	-0.06925	-0.13219	-0.26378		1	-0.0321282	Negative dominant	Linker, 3 and 4		NA
162	ARID1A	N.Cadherin	0	0	0	0	0	-0.29044	0	-0.0705	0	0	0		1	-0.0328127	Negative dominant	1		NA
163	GAPDH	YAP	0	-0.06144	0	0	-0.17873	0	-0.06614	-0.07776	0	0	0		1	-0.0349155	Negative dominant	6		Metabolism
164	Annexin.1	Chk2	0	0	-0.09697	0	0	0	-0.18464	0	-0.04571	0	-0.06461		1	-0.03563	Negative dominant	Linker, 5 and 6		NA
165	cIAP	N.Cadherin	-0.17461	-0.02015	0	-0.25648	0	0	0	0	0	0	0		1	-0.0410218	Negative dominant	1		NA
166	BRCA2	EGFR	0	-0.13415	0	0	0	-0.2071	-0.11043	0	0	0	0		1	-0.0410618	Negative dominant	1		NA
167	beta.Catenin	Lck	0	-0.20104	0	-0.25829	0	0	0	0	0	0	0		1	-0.0417573	Negative dominant	Linker, 3 and 6		Disease, Diseases of signal transduction, Immune System, Innate Immune System, Signal Transduction
168	ATM	PEA15_pS116	0	0	-0.27992	-0.09683	0	0	0	0	0	-0.09501	0		1	-0.0428873	Negative dominant	Linker, 1 and 3		NA
169	beta.Catenin	YAP	0	0	0	0	0	-0.19908	-0.28518	0	0	0	0		1	-0.0440236	Negative dominant	Linker, 3 and 6		Signal Transduction
170	Bak	mTOR_pS2448	-0.13739	-0.15911	0	-0.01968	0	0	0	-0.16815	0	0	0		1	-0.04403	Negative dominant	Linker, 1 and 2		NA
171	FOXO3a_pS318_S321	S6	-0.0934	0	0	-0.20537	0	0	-0.18829	0	0	0	0		1	-0.0442782	Negative dominant	Linker, 5 and 6		Disease, Signal Transduction
172	Annexin.1	HER3	0	0	0	0	0	-0.28206	-0.2556	0	0	0	0		1	-0.0488782	Negative dominant	Linker, 1 and 5		Gastrin-CREB signalling pathway via PKC and MAPK, Signal Transduction, Signaling by GPCR
173	ATM	PDK1	0	0	0	0	0	0	0	0	-0.25465	-0.29786	0		1	-0.0502282	Negative dominant	3		NA
174	HER2	MEK1_pS217_S221	0	0	-0.10385	0	0	0	0	0	0	-0.20911	-0.25249		1	-0.0514045	Negative dominant	Linker, 1 and 2		ARMS-mediated activation, Axon guidance, Cytokine Signaling in Immune system, DAP12 interactions, DAP12 signaling, Developmental Biology, Disease, Downstream signal transduction, Downstream signaling of activated FGFR1, Downstream signaling of activated FGFR2, Downstream signaling of activated FGFR3, Downstream signaling of activated FGFR4, FCERI mediated MAPK activation, FRS-mediated FGFR1 signa…
175	A.Raf_pS299	ERK2	0	0	0	-0.0752	0	-0.29264	-0.2136	0	0	0	0		1	-0.0528582	Negative dominant	Linker, 3 and 4		ARMS-mediated activation, Axon guidance, Cytokine Signaling in Immune system, DAP12 interactions, DAP12 signaling, Developmental Biology, Downstream signal transduction, Downstream signaling of activated FGFR1, Downstream signaling of activated FGFR2, Downstream signaling of activated FGFR3, Downstream signaling of activated FGFR4, FCERI mediated MAPK activation, FRS-mediated FGFR1 signaling, FRS…
176	p27_pT157	TSC1	0	0	0	0	-0.19217	0	0	-0.15719	-0.25581	0	0		1	-0.0550155	Negative dominant	Linker, 1 and 3		Cellular responses to stress, Signal Transduction
177	Bim	p38_pT180_Y182	0	-0.23101	-0.15615	-0.22944	0	0	0	0	0	0	0		1	-0.0560545	Negative dominant	Linker, 2 and 5		Signal Transduction, Signalling by NGF
178	ERK2	p90RSK_pT359_S363	0	0	0	0	0	-0.2777	-0.19602	-0.06305	-0.09395	0	0		1	-0.0573382	Negative dominant	Linker, 2 and 3		Activated TLR4 signalling, Activation of NMDA receptor upon glutamate binding and postsynaptic events, Axon guidance, CREB phosphorylation through the activation of Ras, Cellular Senescence, Cellular responses to stress, Developmental Biology, ERK/MAPK targets, Gastrin-CREB signalling pathway via PKC and MAPK, Immune System, Innate Immune System, L1CAM interactions, MAP kinase activation in TLR c…
179	14.3.3_zeta	JNK2	-0.09881	0	-0.08154	-0.04463	0	0	0	0	0	-0.18883	-0.21915		1	-0.0575418	Negative dominant	Linker, 3 and 6		Immune System
180	Chk1_pS345	Mre11	0.02981	0.21778	-0.37288	-0.29248	0	0	0	0	0	0	-0.22721		1	-0.0586345	Negative dominant	1		Cell Cycle, Cell Cycle Checkpoints, DNA Double-Strand Break Repair, DNA Repair, G2/M Checkpoints, G2/M DNA damage checkpoint, HDR through Homologous Recombination (HR) or Single Strand Annealing (SSA), HDR through Homologous Recombination (HRR), Homologous DNA Pairing and Strand Exchange, Homology Directed Repair, Presynaptic phase of homologous DNA pairing and strand exchange, Processing of DNA …
181	PTEN	Stathmin	-0.16802	0	0	-0.23343	-0.16848	0	0	0	-0.07644	0	0		1	-0.0587609	Negative dominant	Linker, 1 and 6		NA
182	AR	RBM15	-0.12214	0	0	0	0	-0.26952	-0.25795	0	0	0	0		2	-0.0590555	Negative dominant	Linker, 1 and 3		NA
183	HER2	PI3K.p110.alpha	0	0	0	0	0	-0.19765	-0.28427	-0.16778	0	0	0		1	-0.0590636	Negative dominant	1		Adaptive Immune System, Constitutive Signaling by Aberrant PI3K in Cancer, Cytokine Signaling in Immune system, DAP12 interactions, DAP12 signaling, Disease, Diseases of signal transduction, Downstream signal transduction, Downstream signaling events of B Cell Receptor (BCR), Downstream signaling of activated FGFR1, Downstream signaling of activated FGFR2, Downstream signaling of activated FGFR3,…
184	AR	eEF2	0	0	-0.08352	0	-0.01864	-0.2653	-0.30419	0	0	0	0		1	-0.0610591	Negative dominant	Linker, 1 and 6		Gene Expression
185	G6PD	HER3	0	0	0	0	-0.06641	-0.27845	-0.27788	0	0	-0.06006	0		2	-0.0620727	Negative dominant	Linker, 1 and 5		NA
186	A.Raf_pS299	PEA15_pS116	0	0	-0.11783	0	0	-0.36137	-0.21957	0	0	0	0		1	-0.0635245	Negative dominant	Linker, 1 and 4		ARMS-mediated activation, Axon guidance, Cytokine Signaling in Immune system, DAP12 interactions, DAP12 signaling, Developmental Biology, Downstream signal transduction, Downstream signaling of activated FGFR1, Downstream signaling of activated FGFR2, Downstream signaling of activated FGFR3, Downstream signaling of activated FGFR4, FCERI mediated MAPK activation, FRS-mediated FGFR1 signaling, FRS…
187	NF.kB.p65_pS536	PEA.15	0	0	0	0	0	-0.44804	-0.06439	0	0	-0.19952	0		1	-0.0647227	Negative dominant	Linker, 2 and 5		Cytokine Signaling in Immune system, Developmental Biology, Fc epsilon receptor (FCERI) signaling, Immune System, Innate Immune System, Signal Transduction, Signaling by Interleukins, Signalling by NGF
188	HER2	PDK1	0	0	-0.09136	0	0	0	0	0	0	-0.358	-0.29554		1	-0.0677182	Negative dominant	Linker, 1 and 3		Signal Transduction
189	Annexin.1	E.Cadherin	-0.19533	0	0	0	0	-0.30462	-0.25483	0	0	0	0		2	-0.0686164	Negative dominant	Linker, 3 and 5		Signal Transduction
190	Bax	GSK3_pS9	0	0	0	0	0	0	0	0	-0.25435	-0.27692	-0.24117		2	-0.0702218	Negative dominant	Linker, 2 and 5		NA
191	Collagen_VI	FoxM1	0	-0.2114	0	0	0	-0.27317	-0.30638	0	0	0	0		1	-0.0719045	Negative dominant	Linker, 5 and 6		NA
192	eEF2	Rictor_pT1135	0	-0.07947	0	0	0	-0.2584	-0.17302	-0.05914	-0.19808	-0.02971	0		1	-0.0725291	Negative dominant	6		Disease
193	Caveolin.1	RBM15	-0.24996	0	0	-0.43695	0	0	0	-0.11906	0	0	0		1	-0.07327	Negative dominant	Linker, 3 and 5		NA
194	beta.Catenin	N.Cadherin	0	0.19109	0	-0.47805	0.16054	0	0	0.36207	-0.53283	0	-0.52978		1	-0.0751782	Negative dominant	Linker, 1 and 3		Adherens junctions interactions, CDO in myogenesis, Cell junction organization, Cell-Cell communication, Cell-cell junction organization, Developmental Biology, Myogenesis
195	14.3.3_zeta	Tuberin	0	-0.08279	-0.07524	0	0	0	0	0	-0.22225	-0.2347	-0.23039		1	-0.0768518	Negative dominant	Linker, 3 and 6		Adaptive Immune System, Gene Expression, Generic Transcription Pathway, Immune System, Signal Transduction, TP53 Regulates Metabolic Genes, Transcriptional Regulation by TP53
196	eEF2	PDK1	0	0.0589	0	-0.07205	0	0	0	-0.10376	-0.24912	-0.26488	-0.23541		1	-0.0787564	Negative dominant	Linker, 3 and 6		NA
197	eIF4G	MEK1_pS217_S221	0	0	-0.34705	-0.22624	0	0	0	0	0	-0.29479	0		1	-0.0789164	Negative dominant	Linker, 2 and 3		Cytokine Signaling in Immune system, IGF1R signaling cascade, IRS-mediated signalling, IRS-related events triggered by IGF1R, Immune System, Insulin receptor signalling cascade, Signal Transduction, Signaling by Insulin receptor, Signaling by Type 1 Insulin-like Growth Factor 1 Receptor (IGF1R)
198	PEA.15	Rb_pS807_S811	0	0	0	-0.42271	-0.1555	-0.22406	-0.06637	0	0	0	0		1	-0.0789673	Negative dominant	Linker, 2 and 5		NA
199	C.Raf_pS338	TSC1	0	0	0	0	0	0	0	-0.07533	-0.29889	0	-0.51304		1	-0.08066	Negative dominant	Linker, 1 and 3		IGF1R signaling cascade, IRS-mediated signalling, IRS-related events triggered by IGF1R, Insulin receptor signalling cascade, Signal Transduction, Signaling by Insulin receptor, Signaling by Type 1 Insulin-like Growth Factor 1 Receptor (IGF1R)
200	eIF4G	PDK1	0	0	0	0	0	0	0	0	-0.24611	-0.34481	-0.30022		1	-0.0810127	Negative dominant	3		Signal Transduction
201	14.3.3_zeta	GAB2	0	0.07669	0	0	-0.27246	0	0	0	-0.26788	-0.24422	-0.19953		1	-0.0824909	Negative dominant	Linker, 3 and 6		Cytokine Signaling in Immune system, Hemostasis, Immune System, Interleukin-3, 5 and GM-CSF signaling, Platelet activation, signaling and aggregation, Signal Transduction, Signaling by Interleukins
202	p90RSK_pT359_S363	PEA.15	0	-0.08685	0	0	-0.15757	-0.45533	0	-0.07581	-0.0686	0	-0.08682		1	-0.0846345	Negative dominant	Linker, 2 and 5		Axon guidance, Developmental Biology, Gastrin-CREB signalling pathway via PKC and MAPK, Immune System, Innate Immune System, NGF signalling via TRKA from the plasma membrane, Signal Transduction, Signaling by GPCR, Signalling by NGF
203	LKB1	RBM15	-0.1362	0	-0.21441	-0.33909	0	-0.11949	-0.12356	0	0	0	0		1	-0.0847955	Negative dominant	Linker, 1 and 3		NA
204	RBM15	Smad4	-0.13218	-0.05562	0	0	0	-0.31024	-0.43586	0	0	0	0		1	-0.0849	Negative dominant	Linker, 3 and 4		NA
205	Akt	PRDX1	0	0	0	-0.05953	0	-0.05887	0	0	-0.27744	-0.25366	-0.30076		1	-0.0863873	Negative dominant	Linker, 3 and 5		Gene Expression, Generic Transcription Pathway, TP53 Regulates Metabolic Genes, Transcriptional Regulation by TP53
206	14.3.3_epsilon	GAB2	0	0	0	-0.04196	0	0	-0.42809	0	-0.25825	-0.24617	0		1	-0.0885882	Negative dominant	Linker, 3 and 4		Signal Transduction
207	Fibronectin	p90RSK	0	0	0	-0.06976	-0.43738	-0.21944	-0.25352	0	0	0	0		1	-0.0891	Negative dominant	Linker, 1 and 3		Axon guidance, Developmental Biology, Gastrin-CREB signalling pathway via PKC and MAPK, Immune System, Innate Immune System, NGF signalling via TRKA from the plasma membrane, Signal Transduction, Signaling by GPCR, Signalling by NGF
208	PDK1	TSC1	0	0	0	0	0	0	0	0.06395	-0.33143	-0.35341	-0.3743		1	-0.0904718	Negative dominant	3		Signal Transduction
209	Akt	Chk2_pT68	0	0	0	-0.02019	0	0	0	-0.44979	-0.28508	0	-0.24798		1	-0.0911855	Negative dominant	Linker, 1 and 3		NA
210	PEA15_pS116	PI3K.p110.alpha	0	-0.12538	-0.28425	-0.08624	0	-0.24549	-0.19416	-0.07626	0	0	0		1	-0.09198	Negative dominant	1		Cytokine Signaling in Immune system, DAP12 interactions, DAP12 signaling, Downstream signal transduction, Downstream signaling of activated FGFR1, Downstream signaling of activated FGFR2, Downstream signaling of activated FGFR3, Downstream signaling of activated FGFR4, Fc epsilon receptor (FCERI) signaling, Gastrin-CREB signalling pathway via PKC and MAPK, IGF1R signaling cascade, IRS-mediated si…
211	ERK2	PDK1	-0.14899	0	0	0	0	0	-0.07012	0.09957	-0.28718	-0.3257	-0.28528		2	-0.0925182	Negative dominant	3		Signal Transduction
212	Rab11	S6	-0.333	0	-0.16939	-0.21778	0	-0.10287	-0.18045	0	0	-0.06695	0		1	-0.0973127	Negative dominant	Linker, 1 and 6		NA
213	PDK1	Tuberin	0	0	0	0	0	0	0	0	-0.33006	-0.36128	-0.38098		1	-0.0974836	Negative dominant	3		Signal Transduction
214	c.Met_pY1235	RBM15	0	0	0	0	-0.26618	-0.30373	-0.25705	-0.27116	0	0	0		1	-0.0998291	Negative dominant	Linker, 1 and 3		NA
215	eEF2	PR	-0.09745	0	0	-0.22767	0	-0.30476	-0.48745	0	0	0	0		1	-0.101575	Negative dominant	Linker, 4 and 6		Gene Expression
216	14.3.3_zeta	STAT5.alpha	0	0	-0.0904	0	0	0	-0.12318	0	-0.29587	-0.31948	-0.30136		1	-0.102754	Negative dominant	Linker, 3 and 6		Cytokine Signaling in Immune system, Immune System, Interleukin-3, 5 and GM-CSF signaling, Signal Transduction, Signaling by Interleukins
217	Chk1	JNK2	-0.20887	0	-0.01744	0	-0.27856	0	0	-0.07825	-0.2598	0	-0.30266		1	-0.104144	Negative dominant	3		NA
218	Ku80	PDK1	0	0	-0.08074	0	-0.09793	0	0	-0.07814	-0.30207	-0.38874	-0.21703		2	-0.105877	Negative dominant	3		NA
219	PDK1	STAT5.alpha	0	-0.06214	-0.08044	-0.05183	0	0	0	0	-0.27449	-0.40664	-0.33447		2	-0.110001	Negative dominant	3		Signal Transduction
220	Collagen_VI	S6	-0.31483	-0.1719	0	-0.24327	0	-0.27453	-0.21962	0	0	0	0		2	-0.111286	Negative dominant	Linker, 5 and 6		Signal Transduction
221	Akt	PDK1	0	0	0	0	0	0	-0.09058	0	-0.36916	-0.37999	-0.40288		1	-0.112965	Negative dominant	3		Metabolism, Signal Transduction
222	Akt	XRCC1	-0.10406	-0.10007	0	0	-0.21422	-0.2106	-0.20303	0	-0.12064	0	-0.29074		1	-0.113033	Negative dominant	Linker, 3 and 4		NA
223	Mre11	p90RSK	0	0	0	0	-0.46365	-0.28011	-0.4415	0	0	-0.06241	-0.03976		1	-0.117039	Negative dominant	Linker, 1 and 3		Cellular Senescence, Cellular responses to stress, Immune System, Innate Immune System
224	A.Raf_pS299	eEF2	0	0	-0.36431	-0.03491	0	-0.36511	-0.52962	0	0	0	0		1	-0.117632	Negative dominant	Linker, 4 and 6		NA
225	C.Raf_pS338	Ku80	-0.34645	-0.09007	0	0	0	0	0	0	-0.29562	-0.31421	-0.26765		1	-0.119455	Negative dominant	Linker, 1 and 3		Immune System, Innate Immune System
226	eEF2	ER.alpha	0	-0.08886	0	-0.50023	-0.17248	-0.2803	-0.28173	0	0	0	0		2	-0.120327	Negative dominant	Linker, 1 and 6		Gene Expression
227	ERK2	MEK1_pS217_S221	0	0	-0.10696	-0.10401	0	0	0	0	-0.50701	-0.28751	-0.3228		1	-0.120754	Negative dominant	Linker, 2 and 3		ARMS-mediated activation, Activated TLR4 signalling, Axon guidance, Cytokine Signaling in Immune system, DAP12 interactions, DAP12 signaling, Developmental Biology, Downstream signal transduction, Downstream signaling of activated FGFR1, Downstream signaling of activated FGFR2, Downstream signaling of activated FGFR3, Downstream signaling of activated FGFR4, FCERI mediated MAPK activation, FRS-me…
228	CD31	NF.kB.p65_pS536	0	0	0	0	0	-0.48895	-0.27459	0	-0.2693	0	-0.2968		1	-0.120876	Negative dominant	Linker, 2 and 4		NA
229	Rab11	RBM15	-0.34813	-0.19747	0	0	0	0	0	-0.34275	0	-0.26931	-0.23526		1	-0.126629	Negative dominant	Linker, 1 and 3		NA
230	PKC.pan_BetaII_pS660	Rad51	-0.09554	-0.15999	0	0	-0.38572	0	-0.22318	0	-0.30082	-0.23833	0		1	-0.127598	Negative dominant	Linker, 1 and 2		Cell Cycle
231	E.Cadherin	Fibronectin	0	-0.41574	-0.18778	0	0	-0.29309	-0.27786	0	-0.1116	0	-0.13425		2	-0.12912	Negative dominant	Linker, 1 and 3		Extracellular matrix organization, Immune System, Integrin cell surface interactions, Signal Transduction
232	ACVRL1	beta.Catenin	0	0	-0.23471	-0.35852	0	0	0	0	0	-0.3147	-0.55479		1	-0.132975	Negative dominant	Linker, 3 and 4		NA
233	Ku80	MEK1_pS217_S221	0	0	0	-0.28077	0	-0.19708	0	0	-0.47396	-0.29635	-0.22435		1	-0.133865	Negative dominant	Linker, 2 and 3		Disease, Immune System, Infectious disease, Innate Immune System
234	14.3.3_beta	beta.Catenin	-0.20312	0	0	-0.27638	-0.22368	0	0	0	0	-0.34768	-0.46755		1	-0.138037	Negative dominant	Linker, 3 and 4		Apoptosis, Developmental Biology, Immune System, Innate Immune System, Programmed Cell Death, RHO GTPase Effectors, Signal Transduction, Signaling by Rho GTPases, Signaling by VEGF, VEGFA-VEGFR2 Pathway
235	Chk2_pT68	TSC1	0	-0.08407	0	0	-0.36241	0	0	-0.36054	-0.32364	-0.13863	-0.25273		1	-0.138365	Negative dominant	Linker, 1 and 3		NA
236	Rab11	Tuberin	-0.47068	0	-0.17076	0	0	0	-0.23845	-0.39816	-0.02871	0	-0.2542		1	-0.141905	Negative dominant	Linker, 1 and 3		NA
237	eEF2	N.Ras	-0.07567	0	-0.26154	-0.45936	0	-0.28315	-0.51373	0	0	0	0		1	-0.144859	Negative dominant	Linker, 4 and 6		Disease
238	Chk1	NF.kB.p65_pS536	0	0	-0.09463	0	0	-0.27487	-0.26656	0	-0.34543	-0.31143	-0.30438		1	-0.145209	Negative dominant	Linker, 2 and 3		Signal Transduction
239	c.Met_pY1235	mTOR	-0.13177	0	0	-0.17899	-0.18014	-0.45871	0	-0.37346	-0.28698	0	0		1	-0.146368	Negative dominant	Linker, 1 and 3		NA
240	Chk1	eIF4G	-0.17115	0	-0.0921	-0.05923	-0.14811	-0.24611	-0.26435	0	-0.1028	-0.30627	-0.23567		1	-0.147799	Negative dominant	3		Signal Transduction
241	Chk1	GAB2	0	0	-0.05875	0	-0.1509	-0.28679	-0.27995	0	-0.19128	-0.3138	-0.38749		1	-0.151724	Negative dominant	3		Signal Transduction, Signaling by SCF-KIT
242	Bid	eIF4G	-0.26645	-0.16837	0	0	-0.36469	-0.27589	-0.42879	-0.28905	0	0	0		1	-0.163022	Negative dominant	Linker, 1 and 3		NA
243	ACVRL1	RBM15	-0.40985	0	-0.16924	-0.41832	0	0	-0.26582	0	0	-0.53298	0		1	-0.163292	Negative dominant	Linker, 3 and 4		NA
244	Tuberin	YAP	-0.23387	0	-0.07902	0	-0.09973	-0.24992	-0.29981	-0.24438	-0.24726	-0.11947	-0.22572		1	-0.163562	Negative dominant	Linker, 3 and 6		Gene Expression, Generic Transcription Pathway, Signal Transduction, Signaling by ERBB4
245	E.Cadherin	Mre11	0	0	-0.10948	-0.25342	0	-0.22579	-0.49005	0	0	-0.26902	-0.50072		1	-0.168044	Negative dominant	Linker, 1 and 3		Immune System
246	14.3.3_epsilon	Akt	0	0	0	0	-0.16307	-0.50881	-0.26239	0	-0.2777	-0.36038	-0.31421		1	-0.171505	Negative dominant	Linker, 3 and 4		Activation of BH3-only proteins, Apoptosis, Gene Expression, Generic Transcription Pathway, Intrinsic Pathway for Apoptosis, Membrane Trafficking, Programmed Cell Death, Signal Transduction, Signalling by NGF, TP53 Regulates Metabolic Genes, Transcriptional Regulation by TP53, Translocation of GLUT4 to the plasma membrane, Vesicle-mediated transport
247	Bap1.c.4	Rab11	-0.24005	-0.3869	-0.09383	0	0	-0.29286	-0.22027	-0.304	0	-0.16611	-0.22965		1	-0.175788	Negative dominant	Linker, 1 and 3		NA
248	Ku80	Mre11	0	0	0	-0.29026	0	-0.26091	-0.45682	-0.48237	-0.255	-0.26353	0		1	-0.182626	Negative dominant	Linker, 1 and 3		DNA Double-Strand Break Repair, DNA Repair, IRF3-mediated induction of type I IFN, Immune System, Innate Immune System, Nonhomologous End-Joining (NHEJ), STING mediated induction of host immune responses
249	Chk1	TSC1	0	0	0	0	-0.18861	-0.484	-0.20345	0	-0.38081	-0.3653	-0.39709		3	-0.183569	Negative dominant	3		Signal Transduction
250	CD31	RBM15	-0.17873	-0.09634	-0.40145	-0.52682	0	-0.31776	-0.24968	-0.28369	0	0	0		2	-0.18677	Negative dominant	Linker, 3 and 4		NA
251	beta.Catenin	CD31	-0.13195	0	-0.25249	-0.3081	0	-0.31312	-0.2907	0	0	-0.45044	-0.31309		1	-0.187263	Negative dominant	Linker, 3 and 4		NA
252	beta.Catenin	Chk1	-0.22334	0	0	-0.32155	-0.23949	0	0	-0.47019	-0.2406	-0.33553	-0.28333		1	-0.192185	Negative dominant	3		Signal Transduction
253	CD31	Tuberin	-0.43531	0	0	-0.17893	0	-0.34552	-0.25796	-0.34874	-0.23368	0	-0.33056		2	-0.1937	Negative dominant	Linker, 3 and 4		NA
254	Chk1	eEF2K	-0.19306	-0.05924	-0.16326	0	0	-0.32456	-0.28326	-0.44143	-0.04431	-0.26267	-0.36251		1	-0.194027	Negative dominant	3		Signal Transduction
255	mTOR	Rab11	-0.26092	-0.08127	0	-0.47581	-0.09519	0	-0.43009	-0.29254	0	0	-0.52862		1	-0.196767	Negative dominant	Linker, 1 and 3		NA
256	C.Raf_pS338	ERK2	0	0	0	0	-0.45849	-0.27195	-0.1703	-0.06991	-0.28958	-0.46111	-0.49299		1	-0.201303	Negative dominant	Linker, 1 and 3		ARMS-mediated activation, Activation of NMDA receptor upon glutamate binding and postsynaptic events, Axon guidance, CREB phosphorylation through the activation of Ras, Cytokine Signaling in Immune system, DAP12 interactions, DAP12 signaling, Developmental Biology, Downstream signal transduction, Downstream signaling of activated FGFR1, Downstream signaling of activated FGFR2, Downstream signalin…
257	Chk1	Ku80	-0.41329	0	0	-0.2943	0	-0.33426	0	-0.1523	-0.28913	-0.41139	-0.32035		2	-0.201365	Negative dominant	3		DNA Double-Strand Break Repair, DNA Repair
258	Collagen_VI	RBM15	-0.36664	-0.33615	-0.1831	-0.39157	-0.08452	0	0	0	-0.21876	-0.22008	-0.48332		2	-0.207649	Negative dominant	Linker, 3 and 5		NA
259	PKC.pan_BetaII_pS660	XRCC1	-0.07331	-0.20321	0	0	0	-0.21696	-0.22811	-0.303	-0.51851	-0.48179	-0.26299		1	-0.207989	Negative dominant	Linker, 2 and 4		NA
260	STAT5.alpha	Stathmin	-0.38612	-0.30396	-0.08501	-0.02359	-0.24881	-0.30491	0	-0.23931	0	-0.32874	-0.45121		1	-0.215605	Negative dominant	Linker, 1 and 3		NA
261	Akt	Chk1	-0.22989	0	-0.1479	-0.02839	-0.36796	-0.23826	-0.17927	-0.17909	-0.35561	-0.34302	-0.31773		2	-0.217011	Negative dominant	3		Signal Transduction, Signaling by SCF-KIT
262	B.Raf	Chk1	0	0	-0.1219	-0.31644	-0.46705	-0.28129	-0.24627	0	-0.35727	-0.37926	-0.22251		4	-0.217454	Negative dominant	3		Signal Transduction, Signaling by SCF-KIT
263	53BP1	Chk1	-0.44257	0	-0.19222	-0.26771	0	-0.53282	-0.27411	0	-0.17694	-0.33713	-0.34946		1	-0.233905	Negative dominant	3		Cell Cycle, Cell Cycle Checkpoints, DNA Double-Strand Break Repair, DNA Repair, G2/M Checkpoints, G2/M DNA damage checkpoint, HDR through Homologous Recombination (HR) or Single Strand Annealing (SSA), Homology Directed Repair, Processing of DNA double-strand break ends
264	Chk1	Tuberin	-0.26011	0	-0.09354	-0.23707	-0.41827	-0.27726	-0.22801	0	-0.39028	-0.32151	-0.41236		1	-0.239855	Negative dominant	3		Signal Transduction, Signaling by SCF-KIT
265	Mre11	RBM15	-0.15064	0	-0.10648	-0.37332	-0.27612	-0.29542	-0.27565	-0.39618	-0.24715	-0.53602	0		2	-0.241544	Negative dominant	Linker, 1 and 3		NA
266	PKC.pan_BetaII_pS660	Stathmin	-0.40557	-0.20624	-0.19576	-0.24347	-0.25738	-0.20368	-0.22428	0	-0.36863	-0.29267	-0.26121		2	-0.241717	Negative dominant	Linker, 1 and 2		NA
267	53BP1	CD31	-0.19053	0	-0.37492	-0.45444	0	-0.31451	-0.34456	-0.31147	0	-0.4719	-0.29029		1	-0.250238	Negative dominant	Linker, 3 and 4		NA
268	14.3.3_epsilon	PKC.pan_BetaII_pS660	-0.20671	-0.16069	-0.1985	0	-0.2263	-0.47555	-0.26039	-0.09063	-0.55878	-0.34338	-0.25135		2	-0.252025	Negative dominant	Linker, 2 and 4		Cell Cycle, Cell Cycle, Mitotic, Signal Transduction
269	Chk1	STAT5.alpha	-0.21047	-0.15246	-0.19268	-0.23152	-0.24566	-0.24222	-0.34534	-0.25514	-0.35213	-0.33652	-0.31909		4	-0.262112	Negative dominant	3		Signal Transduction, Signaling by SCF-KIT
270	Chk1	Mre11	0.24197	0.17324	0.21118	0.3106	0.432	0.16618	0	0.30017	0.50965	0.3808	0.34914		3	0.279539	Heterogeneous	Linker, 1 and 3		Cell Cycle, Cell Cycle Checkpoints, DNA Double-Strand Break Repair, DNA Repair, G2/M Checkpoints, G2/M DNA damage checkpoint, HDR through Homologous Recombination (HR) or Single Strand Annealing (SSA), HDR through Homologous Recombination (HRR), Homologous DNA Pairing and Strand Exchange, Homology Directed Repair, Presynaptic phase of homologous DNA pairing and strand exchange, Processing of DNA …
271	mTOR	Raptor	0.36122	0.31353	0.44638	0.20434	0	0.27886	0.07056	0.41887	0.24515	0.21446	0.18227		7	0.248695	Heterogeneous	3		Cellular response to heat stress, Cellular responses to stress, Energy dependent regulation of mTOR by LKB1-AMPK, Gene Expression, Generic Transcription Pathway, HSF1-dependent transactivation, IGF1R signaling cascade, IRS-mediated signalling, IRS-related events triggered by IGF1R, Insulin receptor signalling cascade, Macroautophagy, PI3K Cascade, PKB-mediated events, Signal Transduction, Signali…
272	53BP1	STAT5.alpha	0	0	0.10937	0.42651	0.37494	0.32825	0.36539	0.45615	0	0.35479	0.29126		2	0.24606	Heterogeneous	3		NA
273	Chk1	Stathmin	0.35727	0.22573	0.21387	0.37956	0.43866	0	0.15361	0	0.38191	0.33905	0.2146		6	0.245842	Heterogeneous	Linker, 1 and 3		NA
274	EGFR	EGFR_pY1068	0.33849	0.12624	0.13834	0.18422	0.3306	0	0	0.50341	0.31734	0.29951	0.42806		3	0.242383	Heterogeneous	Linker, 1 and 2		NA
275	AMPK_alpha	AMPK_pT172	0.35404	0.32341	0.23758	0.22052	0.17358	0.37788	0.33718	0.21683	0	0.18981	0.08189		8	0.228429	Heterogeneous	3		NA
276	Akt_pT308	PRAS40_pT246	0.23438	0.22134	0.56861	0.0655	0	0.46085	0.11927	0.27756	0.13295	0.29954	0.10766		4	0.226151	Heterogeneous	2		AKT phosphorylates targets in the cytosol, Adaptive Immune System, Constitutive Signaling by AKT1 E17K in Cancer, DAP12 interactions, DAP12 signaling, Disease, Diseases of signal transduction, Downstream signal transduction, Downstream signaling events of B Cell Receptor (BCR), Downstream signaling of activated FGFR1, Downstream signaling of activated FGFR2, Downstream signaling of activated FGFR…
277	N.Cadherin	TAZ	0.24243	0	0	0.29641	0	0.48031	0.21482	0	0.36324	0.49727	0.31652		1	0.219182	Heterogeneous	1		NA
278	p70S6K	RBM15	0.23441	0	0	0.32166	0.17697	0.28262	0.2665	0.53529	0.11357	0.20958	0.22045		2	0.214641	Heterogeneous	3		NA
279	Chk1	Rad51	0.3675	0.13343	0	0	0.28511	0.21141	0.25489	0.26462	0.35135	0.47224	0		3	0.212777	Heterogeneous	Linker, 1 and 3		Cell Cycle, DNA Double-Strand Break Repair, DNA Repair, HDR through Homologous Recombination (HR) or Single Strand Annealing (SSA), HDR through Homologous Recombination (HRR), Homologous DNA Pairing and Strand Exchange, Homology Directed Repair, Presynaptic phase of homologous DNA pairing and strand exchange
280	N.Ras	SF2	0.16533	0.17473	0.32048	0	0.17096	0.34874	0.43903	0.38557	0.10296	0.22391	0		6	0.211974	Heterogeneous	4		NA
281	C.Raf_pS338	Chk1	0.2487	0.35526	0.09324	0.45317	0.2013	0	0	0	0.35227	0.34644	0.24351		1	0.208535	Heterogeneous	Linker, 1 and 3		Signal Transduction, Signaling by SCF-KIT
282	Akt	TSC1	0	0	0.15913	0.24028	0.24784	0	0.0662	0.25821	0.37891	0.48774	0.4122		3	0.204592	Heterogeneous	3		Gene Expression, Generic Transcription Pathway, IGF1R signaling cascade, IRS-mediated signalling, IRS-related events triggered by IGF1R, Inhibition of TSC complex formation by PKB, Insulin receptor signalling cascade, PI3K Cascade, PKB-mediated events, Signal Transduction, Signaling by Insulin receptor, Signaling by Type 1 Insulin-like Growth Factor 1 Receptor (IGF1R), TP53 Regulates Metabolic Ge…
283	eEF2K	Ku80	0	0	0.08272	0.44053	0	0.50555	0.28162	0.44163	0	0.229	0.25578		1	0.203348	Heterogeneous	3		NA
284	PKC.alpha_pS657	PKC.delta_pS664	0.07616	0.11278	0.21471	0.18108	0.2164	0.32424	0.28284	0.51047	0.21595	0.07271	0.02769		6	0.203185	Heterogeneous	2		Ca-dependent events, CaM pathway, Calmodulin induced events, DAG and IP3 signaling, DAP12 interactions, DAP12 signaling, Downstream signal transduction, Downstream signaling of activated FGFR1, Downstream signaling of activated FGFR2, Downstream signaling of activated FGFR3, Downstream signaling of activated FGFR4, EGFR interacts with phospholipase C-gamma, G alpha (z) signalling events, G-protei…
285	Mre11	TAZ	0.34583	0	0	0.32301	0.21513	0.12295	0	0.25974	0.41828	0.24887	0.29889		3	0.202973	Heterogeneous	1		NA
286	Bid	N.Cadherin	0.35573	0.04869	0.29934	0.40105	0.1205	0	0.23924	0.06885	0.17913	0.30267	0.21356		5	0.202615	Heterogeneous	1		NA
287	Mre11	N.Ras	0	0	0.28527	0.51473	0.17055	0	0.4519	0	0.23188	0.27782	0.29001		1	0.202015	Heterogeneous	Linker, 1 and 4		Immune System, Innate Immune System
288	mTOR_pS2448	PKC.pan_BetaII_pS660	0.2002	0.34653	0.26799	0	0.35958	0.21299	0.25866	0.30843	0.2493	0	0		1	0.200335	Heterogeneous	2		Adaptive Immune System, Downstream signaling events of B Cell Receptor (BCR), Immune System, Signal Transduction, Signaling by VEGF, Signaling by the B Cell Receptor (BCR), VEGFA-VEGFR2 Pathway
289	Chk2_pT68	Mre11	0.25235	0.16876	0.19154	0.15396	0.21045	0	0	0.42112	0.339	0.18033	0.28461		2	0.200193	Heterogeneous	1		Cell Cycle, Cell Cycle Checkpoints, DNA Double Strand Break Response, DNA Double-Strand Break Repair, DNA Repair, G2/M Checkpoints, G2/M DNA damage checkpoint, Recruitment and ATM-mediated phosphorylation of repair and signaling proteins at DNA double strand breaks
290	Mre11	N.Cadherin	0.24342	0.04357	0	0.3326	0.019	0	0.18368	0.08062	0.53607	0.45274	0.3093		3	0.200091	Heterogeneous	1		NA
291	Akt	STAT5.alpha	0.0203	0.0659	0.0845	0.03902	0.16013	0.30943	0.3505	0	0.36304	0.3483	0.45034		5	0.199224	Heterogeneous	3		Disease, Diseases of signal transduction, Downstream signal transduction, Immune System, Signal Transduction, Signaling by ERBB4, Signaling by PDGF, Signaling by SCF-KIT
292	EGFR_pY1068	EGFR_pY1173	0.08263	-0.06561	0	0.12989	0.3563	0.1013	0.10866	0.84508	0.182	0.27709	0.15036		2	0.197064	Heterogeneous	Linker, 1 and 2		NA
293	DJ.1	PEA.15	0.17839	0	0.35353	0.19078	0.15334	0.44151	0.07266	0.21042	0	0.04644	0.51941		1	0.196953	Heterogeneous	5		NA
294	Akt_pT308	GSK3.alpha.beta_pS21_S9	0.36821	0.22202	0.29556	0.22245	0.03379	0.31159	0.24436	0.35095	0	0.09216	0		3	0.194645	Heterogeneous	2		AKT phosphorylates targets in the cytosol, Adaptive Immune System, Constitutive Signaling by AKT1 E17K in Cancer, DAP12 interactions, DAP12 signaling, Developmental Biology, Disease, Diseases of signal transduction, Downstream signal transduction, Downstream signaling events of B Cell Receptor (BCR), Downstream signaling of activated FGFR1, Downstream signaling of activated FGFR2, Downstream sign…
295	Chk2	Cyclin_B1	0.18601	0.16015	0.17886	0.06164	0.19042	0.22502	0.18492	0.46881	0.24578	0.22796	0		1	0.193597	Heterogeneous	6		Cell Cycle, Cell Cycle Checkpoints, G2/M Checkpoints, G2/M DNA damage checkpoint
296	GAB2	Tuberin	0	0	0.0969	0.17906	0.14489	0.32633	0.30212	0.24143	0.24023	0.24858	0.349		5	0.193504	Heterogeneous	3		Disease, Diseases of signal transduction, Fc epsilon receptor (FCERI) signaling, Immune System, Innate Immune System, Role of LAT2/NTAL/LAB on calcium mobilization, Signal Transduction, Signaling by SCF-KIT
297	Chk1	N.Cadherin	0.28808	0	0.09962	0.32736	0.17543	0	0	0	0.44742	0.31931	0.47125		2	0.193497	Heterogeneous	Linker, 1 and 3		NA
298	HER2_pY1248	Src_pY416	0	0.34697	0	0.19836	0.25634	0	0	0.29229	0.44305	0.33253	0.25675		4	0.193299	Heterogeneous	2		ARMS-mediated activation, Adaptive Immune System, Axon guidance, Cytokine Signaling in Immune system, DAP12 interactions, DAP12 signaling, Developmental Biology, Downstream signal transduction, Downstream signaling of activated FGFR1, Downstream signaling of activated FGFR2, Downstream signaling of activated FGFR3, Downstream signaling of activated FGFR4, FCERI mediated MAPK activation, FRS-media…
299	Akt	Ku80	0.14399	0	0	0.23877	0	0.46483	0	0.23146	0.3323	0.3684	0.33665		1	0.1924	Heterogeneous	3		Disease, Immune System, Innate Immune System
300	N.Ras	SCD1	0	0	0.34226	0	0.2489	0.37167	0.34364	0.29771	0.30205	0.1394	0.05751		6	0.191195	Heterogeneous	4		NA
301	PKC.delta_pS664	PKC.pan_BetaII_pS660	0.36023	0.25169	0.33882	0.25569	0.21966	0.1549	0.08643	0.3577	0.13225	0	-0.06038		4	0.190635	Heterogeneous	2		G alpha (z) signalling events, GPCR downstream signaling, Hemostasis, Immune System, Platelet activation, signaling and aggregation, Signal Transduction, Signaling by GPCR, Signaling by VEGF, VEGFA-VEGFR2 Pathway, VEGFR2 mediated cell proliferation
302	B.Raf	GAB2	0	0.15128	0.14791	0	0	0.28675	0.32229	0.46234	0	0.26621	0.4494		3	0.189653	Heterogeneous	3		Cytokine Signaling in Immune system, Fc epsilon receptor (FCERI) signaling, Immune System, Innate Immune System, Interleukin receptor SHC signaling, Interleukin-2 signaling, Interleukin-3, 5 and GM-CSF signaling, Signal Transduction, Signaling by GPCR, Signaling by Interleukins, Signaling by SCF-KIT
303	BRCA2	N.Ras	0.09915	0.13462	0.43722	0	0.24756	0.05792	0.17781	0	0.25727	0.38288	0.27368		3	0.18801	Heterogeneous	Linker, 1 and 4		NA
304	Akt	ERK2	0.17796	0.12247	0	0	0.17085	0.47175	0	0	0.31635	0.35592	0.43503		3	0.186394	Heterogeneous	3		DAP12 interactions, DAP12 signaling, Developmental Biology, Downstream signal transduction, Downstream signaling of activated FGFR1, Downstream signaling of activated FGFR2, Downstream signaling of activated FGFR3, Downstream signaling of activated FGFR4, Fc epsilon receptor (FCERI) signaling, Hemostasis, IGF1R signaling cascade, IRS-mediated signalling, IRS-related events triggered by IGF1R, Imm…
305	Stathmin	TAZ	0.28016	0	0.12756	0.54348	0.22718	0	0	0	0.36123	0.26484	0.24499		1	0.186313	Heterogeneous	1		NA
306	HER3_pY1289	Mre11	0	0.09126	0	0.03161	0.168	0.44705	0.1329	0	0.3773	0.41093	0.3857		3	0.185886	Heterogeneous	1		Immune System, Innate Immune System
307	NF.kB.p65_pS536	Tuberin_pT1462	0.19847	0.21032	0.23281	0.0744	0.40403	0	0	0.27547	0.26321	0.2636	0.11134		4	0.184877	Heterogeneous	2		Adaptive Immune System, Cellular responses to stress, Disease, Downstream signaling events of B Cell Receptor (BCR), Fc epsilon receptor (FCERI) signaling, Immune System, Innate Immune System, Signal Transduction, Signaling by the B Cell Receptor (BCR), Signalling by NGF
308	eIF4G	NF.kB.p65_pS536	0.18593	0.14669	0	0.04168	0.17618	0.21555	0.29602	0.46771	0	0	0.48458		3	0.183122	Heterogeneous	Linker, 2 and 3		Cytokine Signaling in Immune system, Immune System, Signal Transduction
309	ATM	TSC1	0	0	0.18753	0.25828	0.37924	0	0.21233	0.19281	0.26155	0.23913	0.28041		4	0.182844	Heterogeneous	3		Cellular responses to stress
310	mTOR	p90RSK	0.1529	0.3362	0	0.0707	0.48416	0.34137	0.31826	0	0.20612	0.03347	0.06744		1	0.182784	Heterogeneous	3		Cellular responses to stress, Immune System, Innate Immune System, NGF signalling via TRKA from the plasma membrane, Signal Transduction, Signalling by NGF
311	Bid	Cyclin_D1	0.17311	0.22493	0.27631	0.22751	0.44468	0	0	0.26122	0.2117	0	0.19063		3	0.182735	Heterogeneous	1		NA
312	4E.BP1_pT37T46	4E.BP1_pT70	0.24524	0.18291	0.2887	0.25825	0.23484	0.12112	0.15611	0	0.14647	0.25413	0.12045		2	0.182565	Heterogeneous	Linker, 2 and 5		NA
313	B.Raf	STAT5.alpha	0.09854	0	0.08372	0.17798	0	0.29529	0.32574	0.16562	0.3346	0.33004	0.19114		2	0.182061	Heterogeneous	3		Cytokine Signaling in Immune system, Downstream signal transduction, Immune System, Interleukin-2 signaling, Interleukin-3, 5 and GM-CSF signaling, Signal Transduction, Signaling by ERBB4, Signaling by Interleukins, Signaling by Leptin, Signaling by PDGF, Signaling by SCF-KIT
314	Bad_pS112	PRAS40_pT246	0.16702	0.26678	0.30048	0.45643	0	0.24153	0.25834	0	0.14458	0.16517	0		2	0.181848	Heterogeneous	2		AKT phosphorylates targets in the cytosol, Adaptive Immune System, Constitutive Signaling by AKT1 E17K in Cancer, DAP12 interactions, DAP12 signaling, Disease, Diseases of signal transduction, Downstream signal transduction, Downstream signaling events of B Cell Receptor (BCR), Downstream signaling of activated FGFR1, Downstream signaling of activated FGFR2, Downstream signaling of activated FGFR…
315	Akt_pT308	GSK3_pS9	0.19941	0.2092	0.31959	0.25547	0	0.30667	0.27203	0.32377	0	0.10225	0		4	0.180763	Heterogeneous	2		AKT phosphorylates targets in the cytosol, Adaptive Immune System, Constitutive Signaling by AKT1 E17K in Cancer, DAP12 interactions, DAP12 signaling, Developmental Biology, Disease, Diseases of signal transduction, Downstream signal transduction, Downstream signaling events of B Cell Receptor (BCR), Downstream signaling of activated FGFR1, Downstream signaling of activated FGFR2, Downstream sign…
316	Bap1.c.4	eEF2K	0	0.05704	0.2157	0.45234	0	0.43587	0.34633	0.02787	0.06503	0.14895	0.23249		2	0.180147	Heterogeneous	3		NA
317	ATM	Tuberin	0	0.13802	0	0	0.18144	0.27529	0.26703	0.24062	0.28294	0.33236	0.24839		2	0.178735	Heterogeneous	3		Cellular responses to stress
318	GAB2	STAT5.alpha	0	0	0.13595	0.19203	0	0.35724	0.31247	0	0.29344	0.36049	0.31113		4	0.178432	Heterogeneous	3		Cytokine Signaling in Immune system, Disease, Diseases of signal transduction, FGFR1 mutant receptor activation, Immune System, Interleukin-2 signaling, Interleukin-3, 5 and GM-CSF signaling, Signal Transduction, Signaling by FGFR in disease, Signaling by FGFR1 fusion mutants, Signaling by FGFR1 in disease, Signaling by Interleukins, Signaling by SCF-KIT
319	PKC.pan_BetaII_pS660	STAT5.alpha	0.21642	0	0	0.02047	0.22571	0	0.15465	0.3047	0.41806	0.29091	0.32398		2	0.177718	Heterogeneous	Linker, 2 and 3		Immune System, Signal Transduction
320	c.Met_pY1235	Chk2_pT68	0.32645	0.24914	0	0	0.48046	0	0.06058	0.29473	0.28697	0	0.24177		4	0.176373	Heterogeneous	1		NA
321	ERK2	PKC.pan_BetaII_pS660	0.16406	0.20335	0	0	0.38056	0	0.08347	0.2546	0.30558	0.26375	0.28061		1	0.175998	Heterogeneous	Linker, 2 and 3		Cell Cycle, Cell Cycle, Mitotic, Hemostasis, Immune System, M Phase, Mitotic Prophase, Neuronal System, Neurotransmitter Receptor Binding And Downstream Transmission In The Postsynaptic Cell, Platelet activation, signaling and aggregation, Signal Transduction, Signaling by GPCR, Signaling by VEGF, Transmission across Chemical Synapses, VEGFA-VEGFR2 Pathway, VEGFR2 mediated cell proliferation
322	Akt	ATM	0	0	0.16204	0.17692	0.18442	0.25109	0.12583	0.17538	0.28852	0.28036	0.28882		2	0.175762	Heterogeneous	3		NA
323	GSK3_pS9	Src_pY527	0.09887	0.24346	0.2441	0.31345	0.08709	0.24417	0.25748	0.43795	0	0	0		4	0.175143	Heterogeneous	2		Adaptive Immune System, Axon guidance, DAP12 interactions, DAP12 signaling, Developmental Biology, Downstream signal transduction, Downstream signaling of activated FGFR1, Downstream signaling of activated FGFR2, Downstream signaling of activated FGFR3, Downstream signaling of activated FGFR4, Fc epsilon receptor (FCERI) signaling, GAB1 signalosome, Immune System, Innate Immune System, NGF signal…
324	Bid	HSP70	0.33357	0.23766	0.17468	0.23481	0.29756	0.05574	0.08642	0	0.19832	0.26985	0.02948		2	0.174372	Heterogeneous	1		NA
325	TSC1	Tuberin	0	0	0.11934	0.05381	0.16184	0	0.24469	0.24447	0.38151	0.34567	0.36617		4	0.174318	Heterogeneous	3		Cellular responses to stress, Energy dependent regulation of mTOR by LKB1-AMPK, Gene Expression, Generic Transcription Pathway, IGF1R signaling cascade, IRS-mediated signalling, IRS-related events triggered by IGF1R, Inhibition of TSC complex formation by PKB, Insulin receptor signalling cascade, Macroautophagy, PI3K Cascade, PKB-mediated events, Signal Transduction, Signaling by Insulin receptor…
326	Heregulin	SCD1	0	0	0.26236	0	0.39544	0.35947	0.27855	0.48344	0.1381	0	0		1	0.174305	Heterogeneous	4		NA
327	PKC.pan_BetaII_pS660	Tuberin	0.19923	0.06241	0	0	0.21625	0	0	0.45952	0.34196	0.32514	0.30821		1	0.173884	Heterogeneous	Linker, 2 and 3		Adaptive Immune System, Downstream signaling events of B Cell Receptor (BCR), Immune System, Signal Transduction, Signaling by the B Cell Receptor (BCR)
328	p90RSK_pT359_S363	YB.1_pS102	0.18652	0.20513	0.39635	0.28553	0.17281	0.19803	0.17166	0	0.14699	0.08052	0.05485		4	0.172581	Heterogeneous	2		NA
329	JNK_pT183_Y185	MAPK_pT202_Y204	0.22054	0.22824	0.18066	0.41664	0	0.24193	0.26179	0.12437	0	0.22164	0		3	0.172346	Heterogeneous	2		Activated TLR4 signalling, Activation of the AP-1 family of transcription factors, Cellular Senescence, Cellular responses to stress, FCERI mediated MAPK activation, Fc epsilon receptor (FCERI) signaling, Immune System, Innate Immune System, MAP kinase activation in TLR cascade, MAPK targets/ Nuclear events mediated by MAP kinases, MyD88 cascade initiated on plasma membrane, MyD88 dependent casca…
330	Caveolin.1	MYH11	0.2571	0.30373	0.34614	0.34064	0	0.20093	0.14533	0.09007	0.20949	0	0		6	0.17213	Heterogeneous	5		Signal Transduction
331	Chk2_pT68	Stathmin	0.27086	0.40145	0	0	0.26812	0	0	0.33896	0.33642	0.03058	0.24441		1	0.171891	Heterogeneous	1		NA
332	RBM15	S6	0.35479	0.10686	0.11057	0.28728	0.13574	0	0.26357	0.02041	0.18453	0.07936	0.32969		2	0.170255	Heterogeneous	Linker, 3 and 6		NA
333	PKC.alpha	PKC.delta_pS664	0.08169	0	0.23123	0.06903	0.19931	0.293	0.27542	0.50938	0.20304	0	0		3	0.169282	Heterogeneous	2		Ca-dependent events, CaM pathway, Calmodulin induced events, DAG and IP3 signaling, DAP12 interactions, DAP12 signaling, Downstream signal transduction, Downstream signaling of activated FGFR1, Downstream signaling of activated FGFR2, Downstream signaling of activated FGFR3, Downstream signaling of activated FGFR4, EGFR interacts with phospholipase C-gamma, G alpha (z) signalling events, G-protei…
334	HSP70	N.Cadherin	0.31018	0.04656	0.10196	0.38535	0.1332	0	0.1132	0	0.27088	0.32125	0.17887		4	0.169223	Heterogeneous	1		NA
335	HER2	mTOR	0.35376	0	0	0	0.07491	0	0.12354	0	0.3298	0.4768	0.49146		1	0.168206	Heterogeneous	Linker, 1 and 3		Adaptive Immune System, DAP12 interactions, DAP12 signaling, Disease, Diseases of signal transduction, Downstream signal transduction, Downstream signaling events of B Cell Receptor (BCR), Downstream signaling of activated FGFR1, Downstream signaling of activated FGFR2, Downstream signaling of activated FGFR3, Downstream signaling of activated FGFR4, Fc epsilon receptor (FCERI) signaling, GAB1 si…
336	Bid	Rab11	0.30141	0.25225	0.3758	0.02061	0.09113	0	0.43833	0.30029	0	0.06338	0		3	0.167564	Heterogeneous	1		NA
337	p38_pT180_Y182	PKC.pan_BetaII_pS660	0.23189	0.17862	0.32034	0.26663	0.32148	0.05579	0.12402	0.09056	0.108	0.07834	0.06335		3	0.167184	Heterogeneous	2		Hemostasis, Immune System, Platelet activation, signaling and aggregation, Signal Transduction, Signaling by VEGF, VEGFA-VEGFR2 Pathway
338	C.Raf_pS338	MEK1_pS217_S221	0.10762	0.10281	0.1974	0.22693	0.19674	0	0	0.14982	0.36693	0.2404	0.238		3	0.166059	Heterogeneous	Linker, 1 and 2		ARMS-mediated activation, Axon guidance, Cytokine Signaling in Immune system, DAP12 interactions, DAP12 signaling, Developmental Biology, Downstream signal transduction, Downstream signaling of activated FGFR1, Downstream signaling of activated FGFR2, Downstream signaling of activated FGFR3, Downstream signaling of activated FGFR4, FCERI mediated MAPK activation, FRS-mediated FGFR1 signaling, FRS…
339	NF.kB.p65_pS536	Tuberin	0	0.05978	0.17667	0	0.12898	0.24177	0.29041	0	0.30304	0.30136	0.32284		1	0.165895	Heterogeneous	Linker, 2 and 3		Adaptive Immune System, Cellular responses to stress, Disease, Downstream signaling events of B Cell Receptor (BCR), Fc epsilon receptor (FCERI) signaling, Immune System, Innate Immune System, Signal Transduction, Signaling by the B Cell Receptor (BCR), Signalling by NGF
340	Cyclin_D1	Mre11	0.08948	0.23753	0	0.24463	0.24037	0	0.20916	0.38756	0.29693	0.11889	0		1	0.165868	Heterogeneous	1		Cell Cycle
341	ARHI	CD31	0.13379	0.08489	0.30573	0.5079	0	0.3024	0.4882	0	0	0	0		1	0.165719	Heterogeneous	4		NA
342	ERK2	PEA.15	0.16358	0.21463	0.26451	0.09803	0.21562	0.27237	0.2162	0.37611	0	0	0		5	0.16555	Heterogeneous	Linker, 3 and 5		ARMS-mediated activation, Axon guidance, Cytokine Signaling in Immune system, DAP12 interactions, DAP12 signaling, Developmental Biology, Downstream signal transduction, Downstream signaling of activated FGFR1, Downstream signaling of activated FGFR2, Downstream signaling of activated FGFR3, Downstream signaling of activated FGFR4, FCERI mediated MAPK activation, FRS-mediated FGFR1 signaling, FRS…
343	N.Cadherin	Stathmin	0.2544	0.30129	0	0.23371	0.1311	0	0	0.11683	0.35749	0.21569	0.20249		3	0.164818	Heterogeneous	1		NA
344	HER2	Tuberin	0.24198	0	0	0.43487	0	0	0.15351	0	0.30686	0.29495	0.37834		1	0.164592	Heterogeneous	Linker, 1 and 3		Adaptive Immune System, DAP12 interactions, DAP12 signaling, Disease, Diseases of signal transduction, Downstream signal transduction, Downstream signaling events of B Cell Receptor (BCR), Downstream signaling of activated FGFR1, Downstream signaling of activated FGFR2, Downstream signaling of activated FGFR3, Downstream signaling of activated FGFR4, Fc epsilon receptor (FCERI) signaling, GAB1 si…
345	14.3.3_epsilon	c.Met_pY1235	0.13496	0	0	0	0.25155	0.29585	0.26439	0	0.3006	0.30522	0.24166		4	0.163112	Heterogeneous	Linker, 1 and 4		NA
346	Raptor	Tuberin	0.41635	0	0.06512	0	0.09582	0	0	0.38995	0.27834	0.54843	0		1	0.163092	Heterogeneous	3		Cellular responses to stress, Energy dependent regulation of mTOR by LKB1-AMPK, Gene Expression, Generic Transcription Pathway, IGF1R signaling cascade, IRS-mediated signalling, IRS-related events triggered by IGF1R, Insulin receptor signalling cascade, Macroautophagy, PI3K Cascade, PKB-mediated events, Signal Transduction, Signaling by Insulin receptor, Signaling by Type 1 Insulin-like Growth Fa…
347	BRCA2	Mre11	0	0.32975	0.21546	0	0.22117	0	0	0	0.28693	0.45253	0.28346		2	0.162664	Heterogeneous	1		Cell Cycle, DNA Double-Strand Break Repair, DNA Repair, HDR through Homologous Recombination (HR) or Single Strand Annealing (SSA), HDR through Homologous Recombination (HRR), Homologous DNA Pairing and Strand Exchange, Homology Directed Repair, Meiosis, Meiotic recombination, Presynaptic phase of homologous DNA pairing and strand exchange, Resolution of D-Loop Structures, Resolution of D-loop St…
348	Cyclin_E2	PCNA	0.22601	0.14653	0	0.1734	0.13776	0.09558	0.23821	0.26155	0.1931	0.22463	0.09192		4	0.162608	Heterogeneous	Linker, 1 and 6		Cell Cycle, Cell Cycle, Mitotic, G0 and Early G1, G1/S Transition, Mitotic G1-G1/S phases, S Phase
349	GSK3.alpha.beta_pS21_S9	Rb_pS807_S811	0.24088	0.19828	0.26629	0.48561	0	0.12195	0.27602	0.19575	0	0	0		1	0.162253	Heterogeneous	2		Cellular responses to stress
350	GSK3.alpha.beta_pS21_S9	p38_pT180_Y182	0	0.22741	0.2614	0.24482	0	0.35534	0.33809	0.08185	0.08715	0.07872	0.10504		3	0.161802	Heterogeneous	2		Cellular responses to stress, Developmental Biology, Immune System, Innate Immune System, NGF signalling via TRKA from the plasma membrane, Signal Transduction, Signalling by NGF
351	c.Met_pY1235	Rad51	0.13255	0	0	0	0.27525	0	0.09028	0.40286	0.23181	0.18869	0.4537		1	0.161376	Heterogeneous	1		NA
352	ASNS	Cyclin_B1	0.29713	0.19259	0.21571	0	0.2351	0.27293	0.26153	0	0.29492	0	0		2	0.160901	Heterogeneous	6		NA
353	Akt_pT308	CDK1	0.14263	0.11663	0	0	0.37086	0.16072	0.11935	0	0.26105	0.14592	0.45258		1	0.160885	Heterogeneous	Linker, 2 and 6		Signal Transduction
354	ARID1A	Bap1.c.4	0.22119	0.20472	0.13602	0.03069	0.11321	0.33063	0.26082	0.33349	0	0	0.13403		5	0.160436	Heterogeneous	Linker, 1 and 3		NA
355	eIF4G	FoxM1	0.40922	0.17359	0.23547	0.29473	0	0.30674	0.34321	0	0	0	0		1	0.160269	Heterogeneous	Linker, 3 and 6		NA
356	MAPK_pT202_Y204	YB.1_pS102	0.26393	0.27994	0.22639	0	0.09749	0	0.20592	0.38317	0.18908	0.11195	0		5	0.159806	Heterogeneous	2		Gene Expression
357	Bak	c.Met_pY1235	0.11733	0.12075	0.2287	0.08654	0.2819	0.49859	0.10145	0.25355	0	0	0.0639		1	0.159337	Heterogeneous	1		NA
358	p38_MAPK	p38_pT180_Y182	0.09266	0.11849	0.2471	0.21905	0.38928	0	0.09096	0.22993	0.12582	0.08793	0.15111		2	0.159303	Heterogeneous	Linker, 2 and 6		NA
359	Claudin.7	E.Cadherin	0.19678	0.26483	0.13291	0.26015	0.13693	0.11463	0.18523	0.09389	0.22145	0.07975	0.06319		5	0.159067	Heterogeneous	Linker, 3 and 6		Cell junction organization, Cell-Cell communication, Cell-cell junction organization
360	ERK2	Tuberin	0.1802	0	0	0	0.37006	0	0	0.02712	0.34155	0.32689	0.49964		3	0.158678	Heterogeneous	3		Cellular responses to stress, DAP12 interactions, DAP12 signaling, Downstream signal transduction, Downstream signaling of activated FGFR1, Downstream signaling of activated FGFR2, Downstream signaling of activated FGFR3, Downstream signaling of activated FGFR4, Fc epsilon receptor (FCERI) signaling, IGF1R signaling cascade, IRS-mediated signalling, IRS-related events triggered by IGF1R, Immune S…
361	Akt	HER2	0	0.08433	0	0	0.13092	0.28901	0.15472	0	0.32928	0.33609	0.41819		2	0.158413	Heterogeneous	Linker, 1 and 3		Adaptive Immune System, DAP12 interactions, DAP12 signaling, Developmental Biology, Disease, Diseases of signal transduction, Downregulation of ERBB2:ERBB3 signaling, Downstream signal transduction, Downstream signaling events of B Cell Receptor (BCR), Downstream signaling of activated FGFR1, Downstream signaling of activated FGFR2, Downstream signaling of activated FGFR3, Downstream signaling of…
362	GSK3.alpha.beta_pS21_S9	Src_pY527	0	0.27962	0.20879	0.29084	0	0.2443	0.33536	0.24491	0.08152	0.05559	0		4	0.158266	Heterogeneous	2		Adaptive Immune System, Axon guidance, DAP12 interactions, DAP12 signaling, Developmental Biology, Downstream signal transduction, Downstream signaling of activated FGFR1, Downstream signaling of activated FGFR2, Downstream signaling of activated FGFR3, Downstream signaling of activated FGFR4, Fc epsilon receptor (FCERI) signaling, GAB1 signalosome, Immune System, Innate Immune System, NGF signal…
363	CD20	ETS.1	0.31677	0.19653	0.27472	0.11844	0.43367	0.06454	0.073	0	0.16975	0.09316	0		4	0.158235	Heterogeneous	1		NA
364	NF.kB.p65_pS536	PRAS40_pT246	0.34462	0.16618	0.29632	0.1003	0	0.51253	0.21964	0.06554	0	0	0.02494		1	0.157279	Heterogeneous	2		Adaptive Immune System, Cellular responses to stress, Disease, Downstream signaling events of B Cell Receptor (BCR), Fc epsilon receptor (FCERI) signaling, Immune System, Innate Immune System, Signal Transduction, Signaling by the B Cell Receptor (BCR), Signalling by NGF
365	p38_pT180_Y182	Src_pY527	0	0.17139	0.32351	0.30766	0.12387	0.2206	0.23357	0	0.03599	0.1869	0.12148		2	0.156815	Heterogeneous	2		ADP signalling through P2Y purinoceptor 1, Cell-Cell communication, Developmental Biology, Hemostasis, Immune System, Innate Immune System, NGF signalling via TRKA from the plasma membrane, Platelet activation, signaling and aggregation, Signal Transduction, Signal amplification, Signaling by VEGF, Signalling by NGF, Signalling to ERKs, Signalling to RAS, VEGFA-VEGFR2 Pathway, p38MAPK events
366	PKC.alpha_pS657	PKC.pan_BetaII_pS660	0	0.08003	0.12395	0	0.25484	0.07271	0	0.49848	0.53643	0.09782	0.05932		1	0.156689	Heterogeneous	2		Beta-catenin independent WNT signaling, Cell Cycle, Cell Cycle, Mitotic, Depolymerisation of the Nuclear Lamina, Disinhibition of SNARE formation, G alpha (z) signalling events, GPCR downstream signaling, Glutamate Binding, Activation of AMPA Receptors and Synaptic Plasticity, Hemostasis, Immune System, M Phase, Mitotic Prophase, Neuronal System, Neurotransmitter Receptor Binding And Downstream T…
367	Akt	GAB2	0	0	0	0	0	0.51313	0.32592	0	0.23404	0.33066	0.30513		2	0.155353	Heterogeneous	3		Disease, Diseases of signal transduction, Fc epsilon receptor (FCERI) signaling, G beta:gamma signalling through PI3Kgamma, G-protein beta:gamma signalling, GPCR downstream signaling, GPVI-mediated activation cascade, Hemostasis, Immune System, Innate Immune System, Platelet activation, signaling and aggregation, Role of LAT2/NTAL/LAB on calcium mobilization, Signal Transduction, Signaling by GPC…
368	Bcl.2	p27	0.20929	0.11904	0.11604	0.20118	0.18334	0.18434	0.21152	0	0.25024	0	0.23325		5	0.155295	Heterogeneous	5		Immune System, Innate Immune System
369	c.Met_pY1235	CD20	0.12026	0	0	0.19391	0.17751	0	0.45816	0.39416	0	0.13405	0.23007		1	0.155284	Heterogeneous	1		NA
370	eEF2	ERK2	0.07542	0.06312	0.27114	0.1433	0	0.40105	0.20092	0	0	0.23623	0.30915		1	0.154575	Heterogeneous	Linker, 3 and 6		NA
371	CD20	XBP1	0.15005	0.2971	0.17623	0.21132	0.43459	0	0	0.227	0.0834	0.06276	0.05752		2	0.154543	Heterogeneous	1		NA
372	Cyclin_E2	Rad51	0.22045	0	0	0.17979	0.22352	0.05684	0.27307	0.24168	0.21732	0.28627	0		3	0.154449	Heterogeneous	1		Cell Cycle
373	Akt	PKC.pan_BetaII_pS660	0.02235	0	0.09861	0	0	0.13801	0.16512	0.20736	0.38282	0.36286	0.32018		1	0.154301	Heterogeneous	Linker, 2 and 3		Adaptive Immune System, Downstream signaling events of B Cell Receptor (BCR), GPCR downstream signaling, Hemostasis, Immune System, Platelet activation, signaling and aggregation, Signal Transduction, Signaling by GPCR, Signaling by VEGF, Signaling by Wnt, Signaling by the B Cell Receptor (BCR), VEGFA-VEGFR2 Pathway
374	GSK3_pS9	p38_pT180_Y182	0.09146	0.26898	0.30294	0.36096	0	0.29603	0.30927	0	0	0	0.06683		4	0.154225	Heterogeneous	2		Cellular responses to stress, Developmental Biology, Immune System, Innate Immune System, NGF signalling via TRKA from the plasma membrane, Signal Transduction, Signalling by NGF
375	ATM	RBM15	0.07079	0.31923	0	0	0.32652	0	0	0.38748	0.03977	0.55112	0		2	0.154083	Heterogeneous	3		NA
376	Beclin	XBP1	0.30377	0.30743	0	0.06212	0.11841	0.08725	0.14631	0.17032	0.12845	0.13687	0.22799		4	0.153538	Heterogeneous	1		NA
377	Bad_pS112	p38_pT180_Y182	0.1822	0.24424	0.2124	0.21791	0.20875	0.06047	0	0.23377	0.21115	0.06104	0.05056		7	0.152954	Heterogeneous	2		Immune System, Innate Immune System, NGF signalling via TRKA from the plasma membrane, Signal Transduction, Signalling by NGF
378	c.Met_pY1235	HER3_pY1289	0	0	0.19463	0.26379	0.18465	0.06813	0.2617	0	0.27087	0.20004	0.23308		4	0.152445	Heterogeneous	1		Axon guidance, Developmental Biology
379	CD31	Rab11	0.13405	0.11464	0.09663	0.19099	0.26322	0	0	0.30867	0.19522	0.16652	0.20676		1	0.152427	Heterogeneous	Linker, 1 and 4		NA
380	4E.BP1	4E.BP1_pT70	0.33831	0.26054	0.1206	0.08206	0.091	0	0.10446	0.06904	0.29223	0.24185	0.07247		4	0.152051	Heterogeneous	5		NA
381	Chk2	FoxM1	0.23421	0.18363	0	0	0	0.21812	0.43965	0	0.16618	0.21173	0.21801		2	0.151957	Heterogeneous	6		Cell Cycle
382	G6PD	PRDX1	0.21454	0.17098	0.22092	0.17858	0.13855	0.07077	0.19223	0	0.19913	0.14128	0.1426		3	0.15178	Heterogeneous	5		Gene Expression, Generic Transcription Pathway, TP53 Regulates Metabolic Genes, Transcriptional Regulation by TP53
383	Cyclin_B1	S6	0.28213	0	0	0.49489	0.14343	0.25451	0.47193	0.02102	0	0	0		1	0.151628	Heterogeneous	6		NA
384	GSK3.alpha.beta_pS21_S9	MAPK_pT202_Y204	0	0.2584	0.23218	0.491	0	0.29852	0.38439	0	0	0	0		2	0.151317	Heterogeneous	2		Axon guidance, Cellular response to heat stress, Cellular responses to stress, DAP12 interactions, DAP12 signaling, Developmental Biology, Downstream signal transduction, Downstream signaling of activated FGFR1, Downstream signaling of activated FGFR2, Downstream signaling of activated FGFR3, Downstream signaling of activated FGFR4, Fc epsilon receptor (FCERI) signaling, Immune System, Innate Imm…
385	ACC1	Cyclin_B1	0	0	0.34975	0	0.41949	0.32732	0.51025	0	0	0	0.03791		1	0.14952	Heterogeneous	6		NA
386	EGFR	EGFR_pY1173	0.31246	0	0	0.11695	0.13185	0	0	0.40491	0.24469	0.18497	0.24697		1	0.149345	Heterogeneous	1		NA
387	GSK3.alpha.beta_pS21_S9	MEK1_pS217_S221	0	0.33692	0.28491	0	0.23195	0.50286	0.28149	0	0	0	0		1	0.148921	Heterogeneous	2		Axon guidance, DAP12 interactions, DAP12 signaling, Developmental Biology, Disease, Downstream signal transduction, Downstream signaling of activated FGFR1, Downstream signaling of activated FGFR2, Downstream signaling of activated FGFR3, Downstream signaling of activated FGFR4, Fc epsilon receptor (FCERI) signaling, Immune System, Innate Immune System, NGF signalling via TRKA from the plasma mem…
388	Heregulin	Smad4	0.17188	0.10895	0.37105	0.24597	0	0.21202	0.27319	0	0.25502	0	0		2	0.148916	Heterogeneous	4		Developmental Biology, Disease, Diseases of signal transduction, Signal Transduction
389	Mre11	Rab11	0.19828	0.15375	0	0	0	0	0	0.34381	0	0.47197	0.46453		1	0.148395	Heterogeneous	1		NA
390	FoxM1	PCNA	0.17017	0.15588	0.21094	0.17785	0.21939	0	0	0	0.25162	0.25103	0.18585		3	0.147521	Heterogeneous	6		Cell Cycle, Cell Cycle, Mitotic
391	Dvl3	Paxillin	0.18216	0.14473	0.16811	0.45726	0	0.32164	0.33153	0	0	0	0.01624		3	0.147425	Heterogeneous	3		Signal Transduction
392	ATM	Ku80	0.14664	0.14456	0	0	0.01762	0	0.13185	0.21827	0.17205	0.28563	0.50153		1	0.147105	Heterogeneous	3		DNA Double-Strand Break Repair, DNA Repair, Nonhomologous End-Joining (NHEJ)
393	Bid	c.Met_pY1235	0	0.26233	0	0	0	0.46641	0.25637	0.35119	0	0.05783	0.22067		1	0.1468	Heterogeneous	1		NA
394	ARHI	Rab11	0.24833	0.24115	0	0.45839	0.21746	0	0	0	0.18729	0.06361	0.19785		2	0.146735	Heterogeneous	Linker, 1 and 4		NA
395	S6	S6_pS235_S236	0.1774	0.1294	0.14633	0.12134	0.19589	0.07964	0.12903	0.25663	0.10823	0.1415	0.12028		1	0.14597	Heterogeneous	Linker, 2 and 6		NA
396	14.3.3_epsilon	ARHI	0.2279	0.13384	0.21765	0.28619	0	0	0.2576	0	0	0.20063	0.27842		1	0.145657	Heterogeneous	4		NA
397	Cyclin_D1	N.Cadherin	0.22268	0.32152	0.28979	0.52045	0	0	0	0	0.2471	0	0		1	0.145595	Heterogeneous	1		NA
398	Chk2_pT68	p53	0.36438	0.12216	0.23995	0.18895	0.2343	0	0	0.45166	0	0	0		2	0.145582	Heterogeneous	1		Cell Cycle, Cell Cycle Checkpoints, DNA Double Strand Break Response, DNA Double-Strand Break Repair, DNA Repair, G1/S DNA Damage Checkpoints, Recruitment and ATM-mediated phosphorylation of repair and signaling proteins at DNA double strand breaks
399	4E.BP1_pS65	4E.BP1_pT37T46	0.26477	0.17988	0.26047	0.25319	0.0763	0	0	0.07341	0.15227	0.23382	0.09147		4	0.144144	Heterogeneous	Linker, 2 and 5		NA
400	MEK1_pS217_S221	YB.1_pS102	0.23169	0.22048	0.23078	0	0.10369	0.12696	0.1661	0.19075	0.24037	0.07123	0		1	0.143823	Heterogeneous	2		NA
401	HSP70	TAZ	0.22831	0	0.01959	0.30675	0.09504	0.17369	0.22315	0.31945	0	0	0.21566		1	0.143785	Heterogeneous	1		Gene Expression
402	p21	TAZ	0.02189	0.32018	0.16339	0.28599	0.14214	0	0.24242	0.33255	0	0.06535	0		1	0.143083	Heterogeneous	1		Signal Transduction
403	Bid	Stathmin	0.22717	0.21266	0.10342	0.28653	0.30761	0	0.23849	0	0	0.19438	0		2	0.142751	Heterogeneous	1		NA
404	PDK1_pS241	Tuberin	0.18544	0.217	0	0.06117	0.22015	0.05597	0	0.3635	0.17771	0.07472	0.21064		2	0.142391	Heterogeneous	3		Signal Transduction
405	14.3.3_epsilon	ACVRL1	0.3849	0.31321	0.09572	0	0	0	0	0	0.28059	0.28934	0.20108		1	0.142258	Heterogeneous	4		NA
406	GSK3_pS9	Rb_pS807_S811	0.2119	0.17763	0.28263	0.29587	0	0	0.2652	0.30281	0	0	0.02505		2	0.141917	Heterogeneous	2		Cellular responses to stress
407	Bak	Bid	0	0.16978	0	0	0.1941	0.25264	0.23469	0.34433	0.30143	0.03	0.03324		3	0.141837	Heterogeneous	1		Activation and oligomerization of BAK protein, Apoptosis, Intrinsic Pathway for Apoptosis, Programmed Cell Death
408	JNK_pT183_Y185	p38_pT180_Y182	0.17715	0.21894	0.20207	0.10421	0.12398	0.19955	0.24077	0	0.10803	0.0605	0.11214		2	0.140667	Heterogeneous	2		Activated TLR4 signalling, Activation of the AP-1 family of transcription factors, Cell-Cell communication, Cellular Senescence, Cellular responses to stress, DSCAM interactions, Immune System, Innate Immune System, MAP kinase activation in TLR cascade, MAPK targets/ Nuclear events mediated by MAP kinases, MyD88 cascade initiated on plasma membrane, MyD88 dependent cascade initiated on endosome, …
409	ARHI	Collagen_VI	0.27993	0.12302	0.11132	0.58537	0	0	0	0	0.02411	0.07326	0.34653		1	0.140322	Heterogeneous	Linker, 4 and 5		NA
410	eIF4G	GAB2	0	0.22547	0.22411	0	0	0.3522	0.38696	0	0	0.16434	0.18968		2	0.140251	Heterogeneous	3		Cytokine Signaling in Immune system, Immune System, Signal Transduction
411	PEA15_pS116	YB.1	0.15163	0.06761	0.35228	0	0.07881	0.31515	0.32138	0.12615	0.06152	0.05542	0		2	0.139086	Heterogeneous	1		NA
412	Bad_pS112	YB.1_pS102	0.09171	0.24753	0.20547	0.08552	0.2295	0.06509	0.29269	0	0.09388	0.07157	0.14581		3	0.138979	Heterogeneous	2		NA
413	GSK3_pS9	MAPK_pT202_Y204	0	0.26259	0.24607	0.25537	0	0.34639	0.41631	0	0	0	0		2	0.138794	Heterogeneous	2		Axon guidance, Cellular response to heat stress, Cellular responses to stress, DAP12 interactions, DAP12 signaling, Developmental Biology, Downstream signal transduction, Downstream signaling of activated FGFR1, Downstream signaling of activated FGFR2, Downstream signaling of activated FGFR3, Downstream signaling of activated FGFR4, Fc epsilon receptor (FCERI) signaling, Immune System, Innate Imm…
414	Collagen_VI	Rab11	0.34901	0.17967	0.2602	0.515	0	0	0	0	0	0.21913	0		2	0.138455	Heterogeneous	Linker, 1 and 5		NA
415	4E.BP1_pT37T46	Akt_pS473	0.06027	0.15517	0.12442	0.27195	0.16445	0.06623	0.2023	0.11751	0.17528	0.13089	0.05253		1	0.138273	Heterogeneous	2		Gene Expression, IGF1R signaling cascade, IRS-mediated signalling, IRS-related events triggered by IGF1R, Insulin receptor signalling cascade, PI3K Cascade, PKB-mediated events, Signal Transduction, Signaling by Insulin receptor, Signaling by Type 1 Insulin-like Growth Factor 1 Receptor (IGF1R), mTOR signalling
416	ATM	Rad50	0.11623	0.19506	0.10009	0	0.19717	0.1287	0.12832	0.20522	0.22579	0.22136	0		2	0.137995	Heterogeneous	3		Cell Cycle, Cell Cycle Checkpoints, Cellular Senescence, Cellular responses to stress, DNA Damage/Telomere Stress Induced Senescence, DNA Double Strand Break Response, DNA Double-Strand Break Repair, DNA Repair, G2/M Checkpoints, G2/M DNA damage checkpoint, HDR through Homologous Recombination (HR) or Single Strand Annealing (SSA), HDR through Homologous Recombination (HRR), HDR through Single St…
417	GSK3_pS9	NDRG1_pT346	0.08921	0.41327	0.18984	0.03084	0	0.48607	0.30439	0	0	0	0		1	0.137602	Heterogeneous	2		NA
418	Akt	B.Raf	0	0	0	0	0	0.18081	0.21012	0.16883	0.2568	0.39579	0.30058		3	0.137539	Heterogeneous	3		DAP12 interactions, DAP12 signaling, Developmental Biology, Downstream signal transduction, Downstream signaling of activated FGFR1, Downstream signaling of activated FGFR2, Downstream signaling of activated FGFR3, Downstream signaling of activated FGFR4, Fc epsilon receptor (FCERI) signaling, IGF1R signaling cascade, IRS-mediated signalling, IRS-related events triggered by IGF1R, Immune System, …
419	Chk1	Chk2_pT68	0.17282	0.16145	0	0	0.29552	0	0	0.27348	0.35005	0	0.25293		1	0.136932	Heterogeneous	Linker, 1 and 3		Cell Cycle, Cell Cycle Checkpoints, DNA Double-Strand Break Repair, DNA Repair, G1/S DNA Damage Checkpoints, G2/M Checkpoints, G2/M DNA damage checkpoint, Ubiquitin Mediated Degradation of Phosphorylated Cdc25A, p53-Independent DNA Damage Response, p53-Independent G1/S DNA damage checkpoint
420	Akt_pS473	Src_pY527	0.19961	0.18518	0.23472	0.21722	0	0.21828	0.33666	0	0.04457	0	0.06857		1	0.136801	Heterogeneous	2		Adaptive Immune System, CD28 co-stimulation, CTLA4 inhibitory signaling, Costimulation by the CD28 family, DAP12 interactions, DAP12 signaling, Developmental Biology, Downstream signal transduction, Downstream signaling of activated FGFR1, Downstream signaling of activated FGFR2, Downstream signaling of activated FGFR3, Downstream signaling of activated FGFR4, Fc epsilon receptor (FCERI) signalin…
421	EGFR_pY1068	Src_pY416	0.17231	0.22182	0.23377	0.25377	0.10357	0.06414	0.09086	0.27707	0.03233	0.05171	0		4	0.136486	Heterogeneous	2		ARMS-mediated activation, Adaptive Immune System, Axon guidance, Cytokine Signaling in Immune system, DAP12 interactions, DAP12 signaling, Developmental Biology, Downstream signal transduction, Downstream signaling of activated FGFR1, Downstream signaling of activated FGFR2, Downstream signaling of activated FGFR3, Downstream signaling of activated FGFR4, FCERI mediated MAPK activation, FRS-media…
422	Beclin	N.Ras	0	0	0.28836	0.43988	0	0.50184	0	0.26565	0	0	0		1	0.135975	Heterogeneous	Linker, 1 and 4		NA
423	EGFR_pY1173	HER2_pY1248	0	0	0	0.08896	0.32006	0	0	0.60618	0.15731	0.20686	0.10768		2	0.135186	Heterogeneous	Linker, 1 and 2		ARMS-mediated activation, Adaptive Immune System, Axon guidance, Constitutive Signaling by Aberrant PI3K in Cancer, Cytokine Signaling in Immune system, DAP12 interactions, DAP12 signaling, Developmental Biology, Disease, Diseases of signal transduction, Downstream signal transduction, Downstream signaling events of B Cell Receptor (BCR), Downstream signaling of activated FGFR1, Downstream signal…
424	B.Raf	TSC1	0	0	0	0	0	0.12811	0.24667	0.18864	0.30894	0.32707	0.28761		1	0.135185	Heterogeneous	3		IGF1R signaling cascade, IRS-mediated signalling, IRS-related events triggered by IGF1R, Insulin receptor signalling cascade, Signal Transduction, Signaling by Insulin receptor, Signaling by Type 1 Insulin-like Growth Factor 1 Receptor (IGF1R)
425	4E.BP1_pT37T46	NDRG1_pT346	0.14476	0.30076	0	0	0.10009	0.51041	0.19484	0	0.05257	0	0.1782		1	0.134694	Heterogeneous	2		NA
426	Bap1.c.4	Tuberin	0	0	0	0.27212	0	0.52764	0.35771	0	0	0	0.31808		1	0.134141	Heterogeneous	3		NA
427	NDRG1_pT346	Src_pY527	0.20835	0.17013	0.17102	0.0248	0.38278	0.26315	0.24381	0	0	0	0		2	0.133095	Heterogeneous	2		NA
428	ARHI	Heregulin	0.22595	0.22007	0.22729	0.18669	0.04823	0	0.26754	0.25132	0	0.03624	0		2	0.13303	Heterogeneous	4		NA
429	GSK3_pS9	MEK1_pS217_S221	0	0.32206	0.45965	0	0	0.46485	0.21331	0	0	0	0		1	0.132715	Heterogeneous	2		Axon guidance, DAP12 interactions, DAP12 signaling, Developmental Biology, Disease, Downstream signal transduction, Downstream signaling of activated FGFR1, Downstream signaling of activated FGFR2, Downstream signaling of activated FGFR3, Downstream signaling of activated FGFR4, Fc epsilon receptor (FCERI) signaling, Immune System, Innate Immune System, NGF signalling via TRKA from the plasma mem…
430	Bcl.xL	PEA15_pS116	0.06204	0	0.42251	0.17877	0	0.31916	0.26125	0.21602	0	0	0		2	0.132705	Heterogeneous	1		Immune System, Innate Immune System
431	N.Cadherin	PEA15_pS116	0.23102	0.08312	0.27774	0.34789	0	0.51797	0	0	0	0	0		3	0.132522	Heterogeneous	1		Developmental Biology
432	AR	Mre11	0	0	0	0.02535	0	0.36373	0.32296	0	0.105	0.36552	0.27457		3	0.132466	Heterogeneous	1		NA
433	14.3.3_epsilon	CD31	0.11406	0	0.2099	0	0	0.2742	0.28945	0	0.29442	0	0.27471		1	0.132431	Heterogeneous	4		NA
434	Akt	AMPK_pT172	0	0	0	0.22689	0	0	0	0.23119	0.17947	0.52625	0.29203		1	0.132348	Heterogeneous	3		Gene Expression, Generic Transcription Pathway, IGF1R signaling cascade, IRS-mediated signalling, IRS-related events triggered by IGF1R, Insulin receptor signalling cascade, PI3K Cascade, PKB-mediated events, Signal Transduction, Signaling by Insulin receptor, Signaling by Type 1 Insulin-like Growth Factor 1 Receptor (IGF1R), TP53 Regulates Metabolic Genes, Transcriptional Regulation by TP53, mTO…
435	Bap1.c.4	E.Cadherin	0.23669	0.08355	0.11446	0.18118	0.11055	0.27497	0.21377	0	0	0.04484	0.19507		1	0.13228	Heterogeneous	3		NA
436	4E.BP1_pT37T46	S6_pS240_S244	0.1849	0.14847	0.14038	0.20338	0.1918	0.20441	0.17647	0	0.09921	0.05018	0.05406		2	0.132115	Heterogeneous	2		Activation of the mRNA upon binding of the cap-binding complex and eIFs, and subsequent binding to 43S, Cap-dependent Translation Initiation, Eukaryotic Translation Initiation, Gene Expression, IGF1R signaling cascade, IRS-mediated signalling, IRS-related events triggered by IGF1R, Insulin receptor signalling cascade, Metabolism of proteins, PI3K Cascade, PKB-mediated events, Signal Transduction,…
437	c.Jun_pS73	JNK_pT183_Y185	0.16886	0.22411	0.22376	0.20894	0.2561	0	0	-0.12105	0.14851	0.09895	0.24169		2	0.131806	Heterogeneous	2		Activated TLR4 signalling, Activation of the AP-1 family of transcription factors, Cellular Senescence, Cellular responses to stress, FCERI mediated MAPK activation, Fc epsilon receptor (FCERI) signaling, Immune System, Innate Immune System, MAP kinase activation in TLR cascade, MAPK targets/ Nuclear events mediated by MAP kinases, MyD88 cascade initiated on plasma membrane, MyD88 dependent casca…
438	ERK2	STAT5.alpha	0.36964	0	0	0	0	0	0	0	0.4072	0.31211	0.36039		2	0.131758	Heterogeneous	3		Cytokine Signaling in Immune system, Downstream signal transduction, Growth hormone receptor signaling, Immune System, Interleukin-2 signaling, Interleukin-3, 5 and GM-CSF signaling, Signal Transduction, Signaling by ERBB4, Signaling by Interleukins, Signaling by Leptin, Signaling by PDGF, Signaling by SCF-KIT
439	Bak	ER.alpha_pS118	0	0	0.17458	0.59791	0.40319	0	0	0	0	0.18027	0.08809		2	0.131276	Heterogeneous	1		NA
440	mTOR	Rictor	0.16599	0.06804	0.12253	0	0	0.176	0	0.21069	0.15112	0.19805	0.3512		2	0.131238	Heterogeneous	Linker, 3 and 5		Adaptive Immune System, CD28 co-stimulation, CD28 dependent PI3K/Akt signaling, Constitutive Signaling by AKT1 E17K in Cancer, Costimulation by the CD28 family, DAP12 interactions, DAP12 signaling, Disease, Diseases of signal transduction, Downstream signal transduction, Downstream signaling events of B Cell Receptor (BCR), Downstream signaling of activated FGFR1, Downstream signaling of activate…
441	14.3.3_epsilon	CD20	0.2679	0.15163	0.08748	0	0.4365	0.29519	0.20275	0	0	0	0		2	0.131041	Heterogeneous	Linker, 1 and 4		NA
442	ARHI	Smad4	0.21117	0	0.17986	0.05717	0	0.24462	0.22208	0	0.25866	0	0.26597		1	0.130866	Heterogeneous	4		NA
443	Rictor	Tuberin	0.10126	0.19366	0.10078	0	0	0	0	0.23332	0.2013	0.12132	0.48611		1	0.130705	Heterogeneous	Linker, 3 and 5		Adaptive Immune System, Constitutive Signaling by AKT1 E17K in Cancer, DAP12 interactions, DAP12 signaling, Disease, Diseases of signal transduction, Downstream signal transduction, Downstream signaling events of B Cell Receptor (BCR), Downstream signaling of activated FGFR1, Downstream signaling of activated FGFR2, Downstream signaling of activated FGFR3, Downstream signaling of activated FGFR4,…
444	Cyclin_B1	TRFC	0	0	0.18147	0.18248	0.18676	0.44186	0.21328	0	0.23139	0	0		2	0.130658	Heterogeneous	6		NA
445	Bad_pS112	NF.kB.p65_pS536	0	0	0.24286	0.27541	0	0.20649	0.28449	0	0	0.19612	0.2316		5	0.130634	Heterogeneous	2		Adaptive Immune System, Disease, Downstream signaling events of B Cell Receptor (BCR), Fc epsilon receptor (FCERI) signaling, Immune System, Innate Immune System, Signal Transduction, Signaling by the B Cell Receptor (BCR), Signalling by NGF, p75 NTR receptor-mediated signalling
446	CD31	Heregulin	0.10921	0.09128	0.2987	0.26428	0	0.21318	0.24784	0.20969	0	0	0		1	0.13038	Heterogeneous	4		NA
447	GAB2	Ku80	0	0.0828	0.08787	0	0	0.28614	0.27154	0.07933	0.10069	0.28367	0.23498		1	0.129729	Heterogeneous	3		Disease, Immune System, Innate Immune System
448	Tuberin	Tuberin_pT1462	0.14885	0.21181	0.20929	0.10194	0.21247	0	0.07122	0.23186	0.05668	0.0953	0.0855		3	0.129538	Heterogeneous	Linker, 2 and 3		NA
449	CD20	GATA3	0	0	0.28218	0	0	0.07517	0.07013	0.34543	0.27956	0.04101	0.33099		3	0.129497	Heterogeneous	1		NA
450	ARHI	SCD1	-0.07157	0.0728	0.19838	0	0.28738	0.33584	0.25885	0.33735	0	0	0		1	0.129003	Heterogeneous	4		NA
451	Caspase.7_cleavedD198	Lck	0.28204	0.16072	0.18487	0.23634	0.12937	0	0	0	0.07367	0.11199	0.2388		2	0.128891	Heterogeneous	6		NA
452	GAB2	Paxillin	0	0	0.36783	0	0	0.29525	0.27172	0	0	0	0.47949		2	0.128572	Heterogeneous	3		Signal Transduction
453	ACVRL1	PDK1	0	0	0	0	0.37631	0	0	0	0.32314	0.43984	0.27297		2	0.128387	Heterogeneous	Linker, 3 and 4		NA
454	ER.alpha	Mre11	-0.10358	0	0	0.26097	0	0.4933	0.45647	0	0.02995	0.27475	0		1	0.128351	Heterogeneous	1		NA
455	ACVRL1	Collagen_VI	0.39534	0	0.19714	0.27581	0	0	0	0	0.08912	0.18632	0.26659		1	0.128211	Heterogeneous	Linker, 4 and 5		NA
456	C.Raf_pS338	MAPK_pT202_Y204	0.0774	0.3056	0.35699	0.07184	0.23777	0	0.08621	0	0.27146	0	0		1	0.127934	Heterogeneous	Linker, 1 and 2		ARMS-mediated activation, Activation of NMDA receptor upon glutamate binding and postsynaptic events, Axon guidance, CREB phosphorylation through the activation of Ras, Cytokine Signaling in Immune system, DAP12 interactions, DAP12 signaling, Developmental Biology, Downstream signal transduction, Downstream signaling of activated FGFR1, Downstream signaling of activated FGFR2, Downstream signalin…
457	CDK1	Cyclin_B1	0.2009	0.54738	0.2154	0	0	0.12124	0.13165	0.1038	0.08648	0	0		4	0.127895	Heterogeneous	6		APC/C-mediated degradation of cell cycle proteins, APC/C:Cdc20 mediated degradation of Cyclin B, APC/C:Cdc20 mediated degradation of mitotic proteins, Activation of APC/C and APC/C:Cdc20 mediated degradation of mitotic proteins, Activation of NIMA Kinases NEK9, NEK6, NEK7, Cell Cycle, Cell Cycle Checkpoints, Cell Cycle, Mitotic, Centrosome maturation, Chk1/Chk2(Cds1) mediated inactivation of Cycl…
458	Bak	EGFR_pY1173	0.24203	0.2293	0.38178	0.27974	0.2093	0	0	0	0.03118	0	0.03109		2	0.127675	Heterogeneous	1		NA
459	Mre11	Rad51	0	0.30645	0	-0.02052	0.31272	0	0	0.31796	0.29747	0.19022	0		1	0.127664	Heterogeneous	1		Cell Cycle, DNA Double-Strand Break Repair, DNA Repair, HDR through Homologous Recombination (HR) or Single Strand Annealing (SSA), HDR through Homologous Recombination (HRR), HDR through Single Strand Annealing (SSA), Homologous DNA Pairing and Strand Exchange, Homology Directed Repair, Meiosis, Meiotic recombination, Presynaptic phase of homologous DNA pairing and strand exchange, Resolution of…
460	53BP1	E.Cadherin	0.16226	0	0.15425	0.28759	0	0.25779	0.34176	0	0	0	0.19861		1	0.127478	Heterogeneous	3		NA
461	N.Cadherin	Rab11	0.31033	0	0.38575	0	0	0.24549	0.22668	0	0	0	0.23364		1	0.127445	Heterogeneous	1		NA
462	ACVRL1	FOXO3a	0	0	0.10514	0	0	0	0.43932	0.32484	0.22432	0.23008	0.07754		1	0.127385	Heterogeneous	4		NA
463	14.3.3_beta	SCD1	0	0	0	0	0	0.33325	0.39194	0.40959	0.26445	0	0		2	0.127203	Heterogeneous	4		NA
464	4E.BP1	eIF4E	0.16488	0.16176	0.24499	0.05388	0.17676	0.18225	0.0906	0.17235	0	0.05683	0.09437		1	0.127152	Heterogeneous	5		Activation of the mRNA upon binding of the cap-binding complex and eIFs, and subsequent binding to 43S, Cap-dependent Translation Initiation, Eukaryotic Translation Initiation, Gene Expression, IGF1R signaling cascade, IRS-mediated signalling, IRS-related events triggered by IGF1R, Insulin receptor signalling cascade, Metabolism of proteins, PI3K Cascade, PKB-mediated events, Signal Transduction,…
465	mTOR	TSC1	0.08703	0	0	0.0359	0	0	0	0.31464	0.28835	0.2912	0.37335		1	0.126406	Heterogeneous	3		Cellular responses to stress, Energy dependent regulation of mTOR by LKB1-AMPK, Gene Expression, Generic Transcription Pathway, IGF1R signaling cascade, IRS-mediated signalling, IRS-related events triggered by IGF1R, Insulin receptor signalling cascade, Macroautophagy, PI3K Cascade, PKB-mediated events, Signal Transduction, Signaling by Insulin receptor, Signaling by Type 1 Insulin-like Growth Fa…
466	53BP1	GAB2	0	0	0.09311	0	0	0.32633	0.38765	0.11268	0	0.18824	0.2754		2	0.125765	Heterogeneous	3		NA
467	AMPK_pT172	TSC1	0	0	0	0.19887	0	0.08715	0.22279	0.32162	0	0.20897	0.34046		2	0.125442	Heterogeneous	3		Cellular responses to stress, Energy dependent regulation of mTOR by LKB1-AMPK, Gene Expression, Generic Transcription Pathway, IGF1R signaling cascade, IRS-mediated signalling, IRS-related events triggered by IGF1R, Insulin receptor signalling cascade, Macroautophagy, PI3K Cascade, PKB-mediated events, Signal Transduction, Signaling by Insulin receptor, Signaling by Type 1 Insulin-like Growth Fa…
468	Akt	Paxillin	0.10702	0	0	0	0.17579	0.52221	0.28397	0	0	0	0.28606		1	0.125005	Heterogeneous	3		GAB1 signalosome, Signal Transduction, Signaling by EGFR, Signaling by VEGF, VEGFA-VEGFR2 Pathway
469	PI3K.p85	PREX1	0	0.14806	0	0.18903	0.22914	0	0.21238	0.11633	0.22487	0.04588	0.20892		3	0.124965	Heterogeneous	6		NA
470	Lck	PREX1	-0.10144	0.18277	0.13511	0.25088	0.18144	0	0.06422	0	0.20414	0.21984	0.23474		5	0.1247	Heterogeneous	6		NA
471	PI3K.p85	PTEN	0.16172	0	0	0	0	0.33614	0.2873	0.58397	0	0	0		3	0.124466	Heterogeneous	6		Adaptive Immune System, DAP12 interactions, DAP12 signaling, Downstream TCR signaling, Downstream signal transduction, Downstream signaling events of B Cell Receptor (BCR), Downstream signaling of activated FGFR1, Downstream signaling of activated FGFR2, Downstream signaling of activated FGFR3, Downstream signaling of activated FGFR4, Fc epsilon receptor (FCERI) signaling, GAB1 signalosome, Immun…
472	ETS.1	TAZ	0.37828	0.34234	0	0	0	0.2601	0.19239	0	0	0	0.18998		1	0.123917	Heterogeneous	1		NA
473	c.Jun_pS73	p90RSK_pT359_S363	0	0.23317	0	0.42158	0	0.19018	0.25667	0.08424	0	0.17667	0		2	0.123865	Heterogeneous	2		Activated TLR4 signalling, Cellular Senescence, Cellular responses to stress, Immune System, Innate Immune System, MAP kinase activation in TLR cascade, MAPK targets/ Nuclear events mediated by MAP kinases, MyD88 cascade initiated on plasma membrane, MyD88 dependent cascade initiated on endosome, MyD88:Mal cascade initiated on plasma membrane, Senescence-Associated Secretory Phenotype (SASP), Sig…
474	Raptor	TSC1	0.0999	0	0	0	0	0.27006	0	0.2412	0.26272	0.32351	0.16371		3	0.123736	Heterogeneous	3		Cellular responses to stress, Energy dependent regulation of mTOR by LKB1-AMPK, Gene Expression, Generic Transcription Pathway, IGF1R signaling cascade, IRS-mediated signalling, IRS-related events triggered by IGF1R, Insulin receptor signalling cascade, Macroautophagy, PI3K Cascade, PKB-mediated events, Signal Transduction, Signaling by Insulin receptor, Signaling by Type 1 Insulin-like Growth Fa…
475	Bak	Cyclin_E2	0.19264	0.09007	0.48865	0.27935	0.19056	0	0	0	0.0558	0	0.06273		2	0.123618	Heterogeneous	1		NA
476	eEF2	PEA15_pS116	0.11584	0	0.35375	0.07055	0	0.33544	0.30304	0.18026	0	0	0		3	0.123535	Heterogeneous	Linker, 1 and 6		NA
477	ETS.1	N.Cadherin	0.46835	0	0.26866	0.06398	0	0.28299	0.27214	0	0	0	0		1	0.123284	Heterogeneous	1		NA
478	CD31	Smad4	0.11019	0	0.19321	0.20727	0	0.31919	0.25416	0.27027	0	0	0		3	0.123117	Heterogeneous	4		NA
479	eEF2K	Tuberin	0.19753	0	0	0	0	0.28463	0.30135	0	0	0.23494	0.33578		1	0.123112	Heterogeneous	3		IGF1R signaling cascade, IRS-mediated signalling, IRS-related events triggered by IGF1R, Insulin receptor signalling cascade, PI3K Cascade, PKB-mediated events, Signal Transduction, Signaling by Insulin receptor, Signaling by Type 1 Insulin-like Growth Factor 1 Receptor (IGF1R), mTOR signalling
480	FASN	S6	0	0	0	0.42922	0	0.23992	0.44605	0.11617	0.06626	0	0.05469		1	0.122937	Heterogeneous	6		NA
481	Akt	Raptor	0	0	0	0	0	0.44993	0	0.27275	0.27183	0.35741	0		1	0.122902	Heterogeneous	3		Gene Expression, Generic Transcription Pathway, IGF1R signaling cascade, IRS-mediated signalling, IRS-related events triggered by IGF1R, Insulin receptor signalling cascade, PI3K Cascade, PKB-mediated events, Signal Transduction, Signaling by Insulin receptor, Signaling by Type 1 Insulin-like Growth Factor 1 Receptor (IGF1R), TP53 Regulates Metabolic Genes, Transcriptional Regulation by TP53, mTO…
482	PKC.pan_BetaII_pS660	TSC1	0	0	0	0.05819	0	0	0.11211	0.28779	0.3263	0.36784	0.19731		1	0.122685	Heterogeneous	Linker, 2 and 3		Signal Transduction
483	HER2	YB.1	0	0.062	0	0	0	0.35503	0.29229	0.20203	0	0.20032	0.23626		3	0.122539	Heterogeneous	1		NA
484	E.Cadherin	HER2	0	0.0755	0.16044	0.34684	0	0	0.14874	-0.12892	0	0.44909	0.29622		1	0.122537	Heterogeneous	Linker, 1 and 3		Adaptive Immune System, Immune System, Signal Transduction
485	EGFR_pY1173	Mre11	0.42792	0.21606	0.07353	0	0	0.1848	0.17998	0	0.2639	0	0		1	0.122381	Heterogeneous	1		Immune System, Innate Immune System
486	14.3.3_beta	PR	0	0	0	0.33377	0	0.56585	0.19688	0.20174	0.04268	0	0		1	0.121902	Heterogeneous	4		Gene Expression, Generic Transcription Pathway, Signal Transduction, Signaling by ERBB4
487	BRCA2	Chk1	0	0	0.06442	0	0.31134	0	0	0	0.38484	0.32705	0.25106		1	0.121701	Heterogeneous	Linker, 1 and 3		Cell Cycle, DNA Double-Strand Break Repair, DNA Repair, HDR through Homologous Recombination (HR) or Single Strand Annealing (SSA), HDR through Homologous Recombination (HRR), Homologous DNA Pairing and Strand Exchange, Homology Directed Repair, Presynaptic phase of homologous DNA pairing and strand exchange
488	Fibronectin	TAZ	0.0823	0.16015	0	0.2421	0.1075	0.26831	0.23706	0.23902	0	0	0		2	0.121495	Heterogeneous	1		Signal Transduction
489	p90RSK	Tuberin	0	0	0	0	0.42892	0.3061	0.25875	0.0871	0.21903	0.0364	0		2	0.121482	Heterogeneous	3		Cellular responses to stress, Immune System, Innate Immune System, NGF signalling via TRKA from the plasma membrane, Signal Transduction, Signalling by NGF
490	14.3.3_beta	BRCA2	0	0.05209	0.11	0	0.22267	0	0	0	0.34008	0.35332	0.25791		2	0.121461	Heterogeneous	Linker, 1 and 4		Cell Cycle
491	EGFR_pY1173	Rab11	0.22081	0.18405	0	0	0.37834	0.08029	0.09846	0	0.17601	0.19575	0		2	0.121246	Heterogeneous	1		NA
492	Caveolin.1	Rictor	0	0	0.21795	0.25402	0.0899	0.36019	0.39582	0	0	0.06261	-0.05886		3	0.120148	Heterogeneous	5		Signal Transduction, Signaling by VEGF, VEGFA-VEGFR2 Pathway, VEGFR2 mediated vascular permeability
493	STAT5.alpha	TSC1	0	0	0	0	0	0	0	0.32761	0.33415	0.32771	0.33095		1	0.120038	Heterogeneous	3		Signal Transduction
494	c.Met_pY1235	CD31	0.26277	0.24118	0	0	0	0.29598	0.2781	0	0	0	0.23978		3	0.119801	Heterogeneous	Linker, 1 and 4		NA
495	MAPK_pT202_Y204	NDRG1_pT346	0	0.17756	0.35462	0	0	0.4852	0.27051	0	0.02944	0	0		1	0.119757	Heterogeneous	2		NA
496	E.Cadherin	RBM15	0	0.15506	0.09288	0.28664	0	0.32325	0.29127	0	0	0.16593	0		2	0.119548	Heterogeneous	3		NA
497	Cyclin_D1	HSP70	0.21829	0.24686	0	0.44793	0	0.0635	0	0.33718	0	0	0		1	0.119433	Heterogeneous	1		NA
498	PKC.alpha	PKC.pan_BetaII_pS660	0	0	0.12089	0	0.29991	0	0.11454	0.49318	0.28309	0	0		1	0.119237	Heterogeneous	2		Beta-catenin independent WNT signaling, Cell Cycle, Cell Cycle, Mitotic, Depolymerisation of the Nuclear Lamina, Disinhibition of SNARE formation, G alpha (z) signalling events, GPCR downstream signaling, Glutamate Binding, Activation of AMPA Receptors and Synaptic Plasticity, Hemostasis, Immune System, M Phase, Mitotic Prophase, Neuronal System, Neurotransmitter Receptor Binding And Downstream T…
499	p38_pT180_Y182	YB.1_pS102	0.02029	0.341	0.35143	0	0.13518	0	0	0	0	0	0.45948		1	0.118853	Heterogeneous	2		Gene Expression
500	ACVRL1	Mre11	0.09575	0.06386	0.17463	0.3901	0	0	0	0	0	0.26823	0.31051		1	0.118462	Heterogeneous	Linker, 1 and 4		NA
501	c.Jun_pS73	MAPK_pT202_Y204	0.05839	0.18507	0	0.47688	0.37375	0	0	0	0	0.20713	0		1	0.118293	Heterogeneous	2		Activated TLR4 signalling, Activation of the AP-1 family of transcription factors, Cellular Senescence, Cellular responses to stress, FCERI mediated MAPK activation, Fc epsilon receptor (FCERI) signaling, Immune System, Innate Immune System, MAP kinase activation in TLR cascade, MAPK family signaling cascades, MAPK targets/ Nuclear events mediated by MAP kinases, MyD88 cascade initiated on plasma…
502	Akt	beta.Catenin	0	0	0.06435	0	0.20433	0	0.07004	0.15313	0.16956	0.35104	0.28143		1	0.117625	Heterogeneous	3		Apoptosis, Deactivation of the beta-catenin transactivating complex, Developmental Biology, Disease, Diseases of signal transduction, Immune System, Innate Immune System, Programmed Cell Death, Signal Transduction, Signaling by VEGF, Signaling by Wnt, TCF dependent signaling in response to WNT, VEGFA-VEGFR2 Pathway, VEGFR2 mediated vascular permeability
503	c.Met_pY1235	p27_pT157	0.18834	0.29645	0.19251	0	0.19981	0	0.08628	0.21982	0	0.10999	0		2	0.117564	Heterogeneous	1		NA
504	c.Jun_pS73	Rb_pS807_S811	0.11561	0.18842	0.11162	0.0733	0	0.46099	0	0.1462	0.15452	0.04139	0		1	0.117459	Heterogeneous	2		Cellular Senescence, Cellular responses to stress
505	Bcl.xL	ETS.1	0	0	0.3302	0.17218	-0.12475	0.55278	0.13059	0.12646	0	0	0.09865		1	0.116919	Heterogeneous	1		NA
506	Chk2_pT68	HER3_pY1289	0.10069	0	0.23432	0.11499	0	0	0.07922	0	0.39438	0.12215	0.23917		1	0.116811	Heterogeneous	1		NA
507	C.Raf_pS338	Mre11	0.30229	0.19015	0.0668	0	0.20466	0	0	0	0.2559	0.26461	0		1	0.116765	Heterogeneous	1		Immune System, Innate Immune System
508	PRAS40_pT246	Src_pY527	0	0.1903	0.37286	0.24048	0	0	0	0	0.2344	0.24062	0		1	0.116242	Heterogeneous	2		Adaptive Immune System, DAP12 interactions, DAP12 signaling, Downstream signal transduction, Downstream signaling of activated FGFR1, Downstream signaling of activated FGFR2, Downstream signaling of activated FGFR3, Downstream signaling of activated FGFR4, Fc epsilon receptor (FCERI) signaling, GAB1 signalosome, IGF1R signaling cascade, IRS-mediated signalling, IRS-related events triggered by IGF…
509	Collagen_VI	Fibronectin	0.11327	0	0	0.27172	0	0.27667	0.30175	0.18013	0	0.13059	0		2	0.11583	Heterogeneous	Linker, 1 and 5		Axon guidance, Developmental Biology, Extracellular matrix organization, NCAM signaling for neurite out-growth, Signal Transduction, Signaling by PDGF
510	Beclin	CD31	0.16723	0.25351	0.27961	0.27052	-0.11365	0.08018	0	0.33615	0	0	0		2	0.115777	Heterogeneous	Linker, 1 and 4		NA
511	BRCA2	PDK1	0.08301	0	0	0	0.13399	0.0707	0	0.10736	0.3306	0.31114	0.23639		1	0.115745	Heterogeneous	Linker, 1 and 3		NA
512	c.Met_pY1235	C.Raf_pS338	0.24878	0.17957	0	0	0	0	0.15087	0	0	0.46085	0.23311		1	0.115744	Heterogeneous	1		Axon guidance, Developmental Biology
513	p90RSK_pT359_S363	PRAS40_pT246	0.37705	0.28333	0	0	0	0	0	0	0.12054	0.23704	0.2543		2	0.11566	Heterogeneous	2		Cellular responses to stress, Immune System, Innate Immune System, NGF signalling via TRKA from the plasma membrane, Signal Transduction, Signalling by NGF
514	Chk2_pT68	p27_pT157	0.2691	0.25018	0	0	0.19581	0	0.09828	0.11161	0.10131	0.06589	0.17818		1	0.115487	Heterogeneous	1		Cell Cycle, Cell Cycle Checkpoints, G1/S DNA Damage Checkpoints
515	ARHI	SF2	0	0	0.20882	0	0.2431	0.45927	0.23695	0.12012	0	0	0		1	0.115296	Heterogeneous	4		NA
516	ETS.1	XBP1	0.08839	0.17846	0.0629	0.07705	0.20259	0	0	0.28351	0.20849	0.16666	0		2	0.115277	Heterogeneous	1		NA
517	Akt	eIF4G	0	0	0	0	0	0.19803	0.26095	0.18237	0	0.28477	0.34074		1	0.115169	Heterogeneous	3		Gene Expression, IGF1R signaling cascade, IRS-mediated signalling, IRS-related events triggered by IGF1R, Immune System, Insulin receptor signalling cascade, PI3K Cascade, PKB-mediated events, Regulation of mRNA stability by proteins that bind AU-rich elements, Signal Transduction, Signaling by Insulin receptor, Signaling by Type 1 Insulin-like Growth Factor 1 Receptor (IGF1R), mTOR signalling
518	PCNA	Rad51	0.17218	0.23258	0.2931	0	0	0.18268	0.19032	0.11799	0	0	0.07642		2	0.115025	Heterogeneous	Linker, 1 and 6		Cell Cycle, DNA Double-Strand Break Repair, DNA Repair, HDR through Homologous Recombination (HR) or Single Strand Annealing (SSA), HDR through Homologous Recombination (HRR), Homology Directed Repair
519	Bap1.c.4	p70S6K	0.21811	0	0	0.28384	0	0	0.28667	0	0	0.24244	0.23313		2	0.114926	Heterogeneous	3		NA
520	ERK2	NF2	0.19632	0.16598	0.2128	0	0.10235	0.21499	0.02895	0.07824	0	0.2029	0.06164		4	0.114925	Heterogeneous	3		RHO GTPase Effectors, Signal Transduction, Signaling by Rho GTPases
521	PEA.15	Transglutaminase	0	0.19376	0	0.23546	0.12229	0.47469	0.2263	0	0	0	0		1	0.113864	Heterogeneous	5		NA
522	beta.Catenin	VHL	0	0.09431	0	0.20066	0.19759	0	0	0	0.17627	0.31294	0.26633		1	0.113464	Heterogeneous	3		Immune System
523	ERK2	Ku80	0.15194	0	0	0	0	0.05833	0	0.14627	0.25285	0.33559	0.29236		1	0.112485	Heterogeneous	3		Immune System, Innate Immune System
524	beta.Catenin	NF2	0.18454	0	0.15547	0.17659	0.45702	0	0	0	0	0.26172	0		1	0.112304	Heterogeneous	3		RHO GTPase Effectors, Signal Transduction, Signaling by Rho GTPases
525	C.Raf_pS338	HER3_pY1289	0	0	0	0	0.30444	0.23385	0.28534	0	0.25319	0.15649	0		3	0.112119	Heterogeneous	1		ARMS-mediated activation, Adaptive Immune System, Axon guidance, Cytokine Signaling in Immune system, DAP12 interactions, DAP12 signaling, Developmental Biology, Downstream signal transduction, Downstream signaling of activated FGFR1, Downstream signaling of activated FGFR2, Downstream signaling of activated FGFR3, Downstream signaling of activated FGFR4, FCERI mediated MAPK activation, FRS-media…
526	A.Raf_pS299	SCD1	0.02813	0	0.20496	0.09086	0	0.23645	0.44799	0.21922	0	0	0		1	0.111601	Heterogeneous	4		NA
527	4E.BP1_pT37T46	PRAS40_pT246	0.20349	0.21844	0.16677	0.21584	0	0.11225	0	0.02427	0.05208	0.22795	0		1	0.111008	Heterogeneous	2		IGF1R signaling cascade, IRS-mediated signalling, IRS-related events triggered by IGF1R, Insulin receptor signalling cascade, PI3K Cascade, PKB-mediated events, Signal Transduction, Signaling by Insulin receptor, Signaling by Type 1 Insulin-like Growth Factor 1 Receptor (IGF1R), mTOR signalling, mTORC1-mediated signalling
528	4E.BP1_pT37T46	YB.1_pS102	0	0.18676	0.39889	0	0	0.27219	0.32942	0	0	0.03175	0		2	0.110819	Heterogeneous	2		Gene Expression
529	Bcl.xL	Smad3	0.10708	0	0.42554	0	0	0.22776	0	0.06678	0.1925	0.1986	0		1	0.110751	Heterogeneous	1		NA
530	A.Raf_pS299	N.Ras	0	0	0.22652	0	0	0.32527	0.33957	0.29142	0	0.03442	0		3	0.110655	Heterogeneous	4		ARMS-mediated activation, Axon guidance, Cytokine Signaling in Immune system, DAP12 interactions, DAP12 signaling, Developmental Biology, Downstream signal transduction, Downstream signaling of activated FGFR1, Downstream signaling of activated FGFR2, Downstream signaling of activated FGFR3, Downstream signaling of activated FGFR4, FCERI mediated MAPK activation, FRS-mediated FGFR1 signaling, FRS…
531	N.Ras	PR	0	0	0	0.26101	0	0.31402	0.34111	0.26127	0.03962	0	0		2	0.110639	Heterogeneous	4		Signal Transduction, Signaling by ERBB4
532	eEF2	NF2	0.20464	0.12281	0.26966	0.19573	0	0.20569	0.2159	0	0	0	0		2	0.110403	Heterogeneous	Linker, 3 and 6		NA
533	Fibronectin	HSP70	0	0	0.15131	0.25071	0.14588	0.21755	0.23665	0.20784	0	0	0		1	0.109995	Heterogeneous	1		NA
534	Cyclin_E2	Smad3	0.16276	0	0.29768	0.3313	0.02047	0	0	0	0.22643	0.04177	0.12906		2	0.109952	Heterogeneous	1		NA
535	14.3.3_epsilon	PDK1	0	0	0.18279	0	0	0	0	0	0.35493	0.39652	0.26927		4	0.10941	Heterogeneous	Linker, 3 and 4		Signal Transduction
536	Lck	PI3K.p85	0.11213	0.14061	0.01724	0.16212	0.23761	0	0	0.09953	0.19888	0.19084	0.04379		3	0.109341	Heterogeneous	6		Adaptive Immune System, CD28 co-stimulation, CD28 dependent PI3K/Akt signaling, Cell surface interactions at the vascular wall, Constitutive Signaling by Aberrant PI3K in Cancer, Costimulation by the CD28 family, Cytokine Signaling in Immune system, DAP12 interactions, DAP12 signaling, Disease, Diseases of signal transduction, Downstream TCR signaling, Downstream signal transduction, Downstream s…
537	eIF4G	S6	0.33522	0	0.10186	0.28461	0.11941	0.2875	0	0	0	0	0.07266		1	0.109205	Heterogeneous	Linker, 3 and 6		Activation of the mRNA upon binding of the cap-binding complex and eIFs, and subsequent binding to 43S, Cap-dependent Translation Initiation, Eukaryotic Translation Initiation, GTP hydrolysis and joining of the 60S ribosomal subunit, Gene Expression, IGF1R signaling cascade, IRS-mediated signalling, IRS-related events triggered by IGF1R, Insulin receptor signalling cascade, L13a-mediated translat…
538	p38_pT180_Y182	S6_pS235_S236	0	0.38294	0	0.44512	0	0	0	0	0	0.15669	0.21392		1	0.10897	Heterogeneous	2		Gene Expression, Signal Transduction
539	Bak	CD20	0.16219	0	0.10736	0.21632	0.3312	0	0	0.31771	0	0.06289	0		1	0.108879	Heterogeneous	1		NA
540	Bid	EGFR_pY1173	0.30936	0.25711	0.10353	0	0.39108	0.06981	0	0	0	0	0.06497		2	0.108715	Heterogeneous	1		NA
541	RBM15	TSC1	0	0	0	0	0.25193	0	0	0.25227	0.15854	0.23758	0.28491		1	0.107748	Heterogeneous	3		NA
542	c.Myc	XBP1	0.18128	0.16692	0	0	0.3158	0.0678	0.09515	0.11829	0.06169	0.07844	0.09959		2	0.107724	Heterogeneous	1		NA
543	53BP1	Paxillin	0	0.10662	0.09579	0.24739	0	0.2965	0.24179	0	0	0	0.18896		1	0.107005	Heterogeneous	3		NA
544	HER2_pY1248	HER3	0	0	0.38884	0.32117	0	0.2352	0.22619	0	0	0	0		1	0.106491	Heterogeneous	Linker, 1 and 2		ARMS-mediated activation, Adaptive Immune System, Axon guidance, Constitutive Signaling by Aberrant PI3K in Cancer, Cytokine Signaling in Immune system, DAP12 interactions, DAP12 signaling, Developmental Biology, Disease, Diseases of signal transduction, Downregulation of ERBB2:ERBB3 signaling, Downstream signal transduction, Downstream signaling events of B Cell Receptor (BCR), Downstream signal…
545	CD20	Rab11	0.25407	0.21245	0.17515	0.08633	0	0	0.06047	0.38157	0	0	0		1	0.106367	Heterogeneous	1		NA
546	FOXO3a	Mre11	0	0	0	0	0.4278	0	0	0	0.49122	0.24995	0		1	0.10627	Heterogeneous	Linker, 1 and 4		Immune System, Innate Immune System
547	ARHI	ER.alpha	0	0	0	0.26501	0.22659	0.23505	0.23084	0.14475	0	0	0.06556		2	0.106164	Heterogeneous	Linker, 1 and 4		NA
548	Cyclin_E1	PCNA	0.1668	0	0	0.20179	0.21352	0.2422	0.15645	0	0	0.18509	0		1	0.105986	Heterogeneous	6		Cell Cycle, Cell Cycle, Mitotic, E2F mediated regulation of DNA replication, G0 and Early G1, G1/S Transition, G1/S-Specific Transcription, Mitotic G1-G1/S phases, S Phase
549	HER2	PRAS40_pT246	0	0	0	0.43325	0	0.44405	0.22635	0.05833	0	0	0		1	0.105635	Heterogeneous	Linker, 1 and 2		Adaptive Immune System, DAP12 interactions, DAP12 signaling, Disease, Diseases of signal transduction, Downstream signal transduction, Downstream signaling events of B Cell Receptor (BCR), Downstream signaling of activated FGFR1, Downstream signaling of activated FGFR2, Downstream signaling of activated FGFR3, Downstream signaling of activated FGFR4, Fc epsilon receptor (FCERI) signaling, GAB1 si…
550	N.Ras	PDK1	0	0.30222	0	0	0	0	0	0	0.19764	0.36741	0.29226		2	0.105412	Heterogeneous	Linker, 3 and 4		Signal Transduction
551	eEF2	ETS.1	0.08801	0	0.36759	0.23132	0	0.23918	0.22999	0	0	0	0		2	0.105099	Heterogeneous	Linker, 1 and 6		NA
552	eIF4G	TSC1	0	0.09016	0	0	0	0.14263	0.12412	0.25868	0	0.29128	0.24896		1	0.105075	Heterogeneous	3		Gene Expression, IGF1R signaling cascade, IRS-mediated signalling, IRS-related events triggered by IGF1R, Insulin receptor signalling cascade, PI3K Cascade, PKB-mediated events, Signal Transduction, Signaling by Insulin receptor, Signaling by Type 1 Insulin-like Growth Factor 1 Receptor (IGF1R), mTOR signalling
553	HER2_pY1248	Shc_pY317	0	0	0.1021	0.06466	0.2302	0	0	0.14383	0.16483	0.1969	0.25166		2	0.104925	Heterogeneous	2		ARMS-mediated activation, Adaptive Immune System, Axon guidance, Cytokine Signaling in Immune system, DAP12 interactions, DAP12 signaling, Developmental Biology, Disease, Diseases of signal transduction, Downstream signal transduction, Downstream signaling of activated FGFR1, Downstream signaling of activated FGFR2, Downstream signaling of activated FGFR3, Downstream signaling of activated FGFR4,…
554	eEF2K	Paxillin	0	0	0.01914	0.22056	0	0.1535	0.27163	0	0	0	0.48894		1	0.104888	Heterogeneous	3		Signal Transduction
555	4E.BP1_pT37T46	Bad_pS112	0	0.16211	0.20774	0.24231	0	0.18061	0.17652	0	0.15008	0.02921	0		2	0.104416	Heterogeneous	2		Signal Transduction
556	AMPK_alpha	mTOR	0.05692	0	0.10323	0.19225	0.18084	0.07816	0	0.4417	0	0.09284	0		1	0.104176	Heterogeneous	3		Cellular responses to stress, Energy dependent regulation of mTOR by LKB1-AMPK, Gene Expression, Generic Transcription Pathway, IGF1R signaling cascade, IRS-mediated signalling, IRS-related events triggered by IGF1R, Insulin receptor signalling cascade, Macroautophagy, PI3K Cascade, PKB-mediated events, Signal Transduction, Signaling by Insulin receptor, Signaling by Type 1 Insulin-like Growth Fa…
557	ER.alpha	ER.alpha_pS118	0.38757	0.19184	0.4468	0	0	0.11962	0	0	0	0	0		3	0.104166	Heterogeneous	1		NA
558	mTOR_pS2448	S6_pS240_S244	0.35922	0.34898	0	0.09321	0	0.05333	0	0	0	0.26028	0.02997		1	0.10409	Heterogeneous	2		Disease, Gene Expression, IGF1R signaling cascade, IRS-mediated signalling, IRS-related events triggered by IGF1R, Insulin receptor signalling cascade, PI3K Cascade, PKB-mediated events, Signal Transduction, Signaling by Insulin receptor, Signaling by Type 1 Insulin-like Growth Factor 1 Receptor (IGF1R), mTOR signalling, mTORC1-mediated signalling
559	E.Cadherin	Ku80	0	0	0	0.46695	0	0.25845	0.18413	-0.03563	0	0	0.26982		1	0.103975	Heterogeneous	3		Immune System
560	Bcl.2	c.Kit	0	0.07631	0.15689	0.19268	0	0.22395	0.10617	0	0.04544	0.10553	0.23454		2	0.103774	Heterogeneous	5		Immune System, Innate Immune System
561	PDK1_pS241	PKC.pan_BetaII_pS660	0	0	0	0	0.43244	0	0.07664	0.38687	0.24547	0	0		1	0.103765	Heterogeneous	Linker, 2 and 3		Signal Transduction
562	CD20	EGFR_pY1173	0.23776	0	0.16361	0.19864	0.18734	0.23255	0.12082	0	0	0	0		1	0.103702	Heterogeneous	1		NA
563	Akt	VHL	0.08238	0	0	0	0	0.19992	0	0	0.2854	0.26794	0.30389		1	0.103594	Heterogeneous	3		Adaptive Immune System, Immune System
564	eIF4E	MEK1	0.10211	0.1197	0.31182	0.12506	0.29847	0.07151	0	-0.15358	0.15817	0.1057	0		1	0.103542	Heterogeneous	Linker, 2 and 5		Cytokine Signaling in Immune system, IGF1R signaling cascade, IRS-mediated signalling, IRS-related events triggered by IGF1R, Immune System, Insulin receptor signalling cascade, Signal Transduction, Signaling by Insulin receptor, Signaling by Type 1 Insulin-like Growth Factor 1 Receptor (IGF1R)
565	4E.BP1_pS65	4E.BP1_pT70	0.19928	0.24898	0	0.11562	0.0713	0	0	0	0.24939	0.17879	0.07461		3	0.103452	Heterogeneous	5		NA
566	HSP70	Rab11	0.21299	0.21352	0.08892	0	0	0	0	0.29982	0	0	0.31463		2	0.102716	Heterogeneous	1		NA
567	p70S6K_pT389	Shc_pY317	0.15175	0.18694	0.28786	0.2145	0.20184	0	0	0	0.03268	0	0.05377		1	0.102667	Heterogeneous	2		IGF1R signaling cascade, IRS-mediated signalling, IRS-related events triggered by IGF1R, Insulin receptor signalling cascade, Signal Transduction, Signaling by Insulin receptor, Signaling by Type 1 Insulin-like Growth Factor 1 Receptor (IGF1R)
568	GSK3.alpha.beta	mTOR	0.20816	0.21187	0.06609	0.06769	0.13172	0	0	0.32201	0	0.06023	0.05207		1	0.101804	Heterogeneous	3		Adaptive Immune System, Cellular response to heat stress, Cellular responses to stress, Constitutive Signaling by AKT1 E17K in Cancer, DAP12 interactions, DAP12 signaling, Disease, Diseases of signal transduction, Downstream signal transduction, Downstream signaling events of B Cell Receptor (BCR), Downstream signaling of activated FGFR1, Downstream signaling of activated FGFR2, Downstream signal…
569	Lck	Syk	0.11661	0	0.07566	0	0.18702	0	0	0.16666	0.24596	0.21413	0.1115		2	0.101595	Heterogeneous	6		Adaptive Immune System, Cytokine Signaling in Immune system, DAP12 interactions, DAP12 signaling, Fc epsilon receptor (FCERI) signaling, GPVI-mediated activation cascade, Hemostasis, Immune System, Innate Immune System, Interleukin-2 signaling, Platelet activation, signaling and aggregation, Role of LAT2/NTAL/LAB on calcium mobilization, Signal Transduction, Signaling by Interleukins, Signaling b…
570	ACC_pS79	Rb_pS807_S811	0	0	0.15482	0.30555	0	0.21503	0.43827	0	0	0	0		1	0.101243	Heterogeneous	Linker, 2 and 6		NA
571	Bap1.c.4	Dvl3	0	0	0.20155	0	0	0.11066	0.23817	0.25769	0.07576	0	0.22683		1	0.100969	Heterogeneous	3		NA
572	GSK3.alpha.beta	PDK1_pS241	0.15927	0	0	0.07899	0	0.07469	0.09436	0.2857	0.10351	0.09149	0.21966		2	0.100697	Heterogeneous	3		Signal Transduction
573	eIF4G	STAT5.alpha	0	0	0.06965	0.02725	0	0.21422	0.33955	0.29461	0	0.16102	0		2	0.100573	Heterogeneous	3		Cytokine Signaling in Immune system, Immune System, Signal Transduction
574	Rad51	Stathmin	0	0.1825	0.25365	0	0.36601	0	0	0	0.2995	0	0		1	0.100151	Heterogeneous	1		NA
575	NF.kB.p65_pS536	p38_pT180_Y182	0.17051	0	0.17527	0.18023	0.19657	0	0.12314	0.13465	0	0	0.12122		1	0.100145	Heterogeneous	2		Activated TLR4 signalling, Cellular Senescence, Cellular responses to stress, Developmental Biology, Immune System, Innate Immune System, MAP kinase activation in TLR cascade, MyD88 cascade initiated on plasma membrane, MyD88 dependent cascade initiated on endosome, MyD88:Mal cascade initiated on plasma membrane, Signal Transduction, Signalling by NGF, TRAF6 mediated induction of NFkB and MAP kin…
576	14.3.3_beta	PDK1	0	0	0	0	0.07951	0	0.07218	0	0.31082	0.37367	0.26539		2	0.100143	Heterogeneous	Linker, 3 and 4		Signal Transduction
577	CD20	SF2	0	0.16434	0	0.4933	0	0.24435	0.19913	0	0	0	0		1	0.100102	Heterogeneous	Linker, 1 and 4		NA
578	BRCA2	TAZ	0	0.09076	0	-0.09891	0.19081	0	0	0	0.26761	0.3233	0.32594		1	0.0999555	Heterogeneous	1		NA
579	HER3_pY1289	N.Cadherin	0.1855	0	0	0	0	0	0	0.02529	0.33445	0.24554	0.30766		3	0.0998582	Heterogeneous	1		Developmental Biology
580	ARHI	CD20	0.42335	0.24149	0	0	0	0	0.2354	0	0.12252	0.07276	0		1	0.0995927	Heterogeneous	Linker, 1 and 4		NA
581	Chk2	Ku80	0.19727	0.23079	0	0	0	0	0.15743	0.19288	0	0.22896	0.08739		1	0.09952	Heterogeneous	Linker, 3 and 6		DNA Double-Strand Break Repair, DNA Repair
582	PDCD4	PKC.pan_BetaII_pS660	0	0	0.19804	0.25147	0	0.23492	0.31371	0	0	0.06669	0.02741		4	0.0992945	Heterogeneous	2		NA
583	E.Cadherin	HER3	0	0	0	0.27007	0.16617	0.30408	0.27488	0	0.03681	0	0.03999		1	0.0992727	Heterogeneous	Linker, 1 and 3		Adaptive Immune System, Immune System, Signal Transduction
584	GSK3.alpha.beta_pS21_S9	YB.1_pS102	0	0.21754	0.25508	0	0	0.29846	0.32045	0	0	0	0		1	0.09923	Heterogeneous	2		NA
585	c.Met_pY1235	YAP	0	0	0	0	0.4365	0.36947	0.28125	0	0	0	0		1	0.0988382	Heterogeneous	Linker, 1 and 6		NA
586	AR	PR	0.2113	0.1891	0.17947	0	-0.01828	0	0.52534	0	0	0	0		1	0.0988118	Heterogeneous	Linker, 1 and 4		Gene Expression, Generic Transcription Pathway, Nuclear Receptor transcription pathway, Signal Transduction
587	14.3.3_zeta	4E.BP1	0.09637	0	0	0.04378	0.19179	0.07028	0	-0.07664	0.30019	0.19461	0.26391		1	0.0985718	Heterogeneous	Linker, 5 and 6		Gene Expression, Signal Transduction
588	Mre11	p27_pT157	0.25393	0.18774	0	0.26721	0.37259	0	0	0	0	0	0		1	0.0983155	Heterogeneous	1		Cell Cycle, Cell Cycle Checkpoints, Cellular Senescence, Cellular responses to stress, DNA Damage/Telomere Stress Induced Senescence, Immune System, Innate Immune System
589	CD20	PR	0	0	0	0.06337	0	0.28233	0.23477	0.4624	0	0	0.03629		1	0.0981055	Heterogeneous	Linker, 1 and 4		NA
590	p38_pT180_Y182	PDCD4	0	0	0.25708	0.21966	0.11035	0	0.09059	0	0.07406	0.22642	0.10065		1	0.0980736	Heterogeneous	2		NA
591	Collagen_VI	MYH11	0.24073	0.22492	0.08878	0.22121	0	0.12484	0.17236	0	0	0	0		1	0.0975309	Heterogeneous	5		Axon guidance, Developmental Biology, Signal Transduction
592	PDCD4	S6_pS235_S236	0.09465	0	0.20035	0.24753	0.16648	0.20165	0.08606	0	0.04803	0.02807	0		1	0.0975291	Heterogeneous	2		NA
593	Bax	PEA.15	0.15394	0.17055	0	0.09753	0	0	0	0	0.2133	0.1853	0.2504		2	0.0973655	Heterogeneous	5		NA
594	Cyclin_D1	TAZ	0.0722	0	0	0.30609	0.11995	0	0	0.17498	0.19533	0.12915	0.06008		1	0.0961618	Heterogeneous	1		Signal Transduction
595	Akt_pT308	Src_pY527	0.10165	0.35832	0	0	-0.08426	0.2811	0.24621	0	0.09231	0.05774	0		1	0.0957336	Heterogeneous	2		Adaptive Immune System, CD28 co-stimulation, CTLA4 inhibitory signaling, Costimulation by the CD28 family, DAP12 interactions, DAP12 signaling, Developmental Biology, Downstream signal transduction, Downstream signaling of activated FGFR1, Downstream signaling of activated FGFR2, Downstream signaling of activated FGFR3, Downstream signaling of activated FGFR4, Fc epsilon receptor (FCERI) signalin…
596	LKB1	Mre11	0.19601	0	0.13996	0.33618	0	0.06356	0.11563	0	0	0	0.19548		3	0.0951655	Heterogeneous	1		NA
597	eIF4E	PCNA	0.04814	0.08395	0	0	0.23299	0.45361	0.22627	0	0	0	0		1	0.0949964	Heterogeneous	Linker, 5 and 6		NA
598	IRS1	Mre11	0.06567	0.1317	0	0	0	0	0	0.45146	0.10215	0.23769	0.05624		1	0.0949918	Heterogeneous	1		Immune System, Innate Immune System
599	C.Raf_pS338	EGFR_pY1173	0.25426	0.09938	0	0	0	0	0	0	0.09109	0.33741	0.26274		1	0.0949891	Heterogeneous	1		ARMS-mediated activation, Adaptive Immune System, Axon guidance, Cytokine Signaling in Immune system, DAP12 interactions, DAP12 signaling, Developmental Biology, Downstream signal transduction, Downstream signaling of activated FGFR1, Downstream signaling of activated FGFR2, Downstream signaling of activated FGFR3, Downstream signaling of activated FGFR4, FCERI mediated MAPK activation, FRS-media…
600	ERK2	TSC1	0.0577	0	0	0	0	0	0	0	0.31346	0.34114	0.33037		3	0.0947882	Heterogeneous	3		Cellular responses to stress, IGF1R signaling cascade, IRS-mediated signalling, IRS-related events triggered by IGF1R, Insulin receptor signalling cascade, Signal Transduction, Signaling by Insulin receptor, Signaling by Type 1 Insulin-like Growth Factor 1 Receptor (IGF1R)
601	Chk1	HER3_pY1289	0.07135	0	0	0	0	0	0	0.07761	0.33887	0.34031	0.21415		2	0.0947536	Heterogeneous	Linker, 1 and 3		Signal Transduction, Signaling by SCF-KIT
602	Cyclin_E2	Stathmin	0	0	0	0	0.52042	0	0	0.21728	0.26488	0.03877	0		1	0.0946682	Heterogeneous	1		NA
603	ARHI	Mre11	0	0	0.1939	0.56376	0	0	0	0	0	0	0.28318		1	0.0946218	Heterogeneous	Linker, 1 and 4		NA
604	ARHI	Shc_pY317	0.08778	0	0.27784	0.17437	0	0.28019	0.10158	0.11815	0	0	0		1	0.0945373	Heterogeneous	Linker, 2 and 4		NA
605	Bcl.2	Lck	0	0.13707	-0.09192	0.42858	0	0	0.12102	0.08806	0.05317	0.13796	0.16264		1	0.0942345	Heterogeneous	Linker, 5 and 6		Immune System, Innate Immune System
606	Chk2	eEF2	0.16257	0	0	0	0.2117	0	0.13241	0.22566	0.10738	0.19179	0		3	0.0937736	Heterogeneous	6		NA
607	Chk1	PDK1	0	0.11711	0	0.05589	0	0	0	0	0.19647	0.3854	0.27479		2	0.0936055	Heterogeneous	3		Signal Transduction
608	ERK2	GSK3.alpha.beta_pS21_S9	0.07742	0	0	0.04201	0.244	0	0	0	0.34978	0.05844	0.25536		1	0.0933645	Heterogeneous	Linker, 2 and 3		Axon guidance, Cellular response to heat stress, Cellular responses to stress, DAP12 interactions, DAP12 signaling, Developmental Biology, Downstream signal transduction, Downstream signaling of activated FGFR1, Downstream signaling of activated FGFR2, Downstream signaling of activated FGFR3, Downstream signaling of activated FGFR4, Fc epsilon receptor (FCERI) signaling, Immune System, Innate Imm…
609	HER2	NF.kB.p65_pS536	0	0	0	0	0	0.17899	0	0	0.255	0.3312	0.26101		2	0.0932909	Heterogeneous	Linker, 1 and 2		Adaptive Immune System, Cytokine Signaling in Immune system, Developmental Biology, Disease, Downstream signaling events of B Cell Receptor (BCR), Fc epsilon receptor (FCERI) signaling, Immune System, Innate Immune System, Signal Transduction, Signaling by Interleukins, Signaling by the B Cell Receptor (BCR), Signalling by NGF
610	eEF2K	ER.alpha_pS118	0.41069	0	0.18853	0.22916	0	0	0.08765	0	0.10815	0	0		1	0.0931073	Heterogeneous	Linker, 1 and 3		Signal Transduction
611	ERK2	Rad50	0	0	0	0.06624	0.01607	0.26192	0	0	0.26092	0.24984	0.16842		1	0.0930373	Heterogeneous	3		Cell Cycle, Cellular Senescence, Cellular responses to stress
612	GAB2	MIG.6	0.13226	-0.14813	0.12477	0.0265	0.90772	0	0.08399	-0.09269	-0.0165	0	0		1	0.0925382	Heterogeneous	Linker, 1 and 3		NA
613	ACVRL1	Annexin_VII	0	0.21423	0.18362	0	0	0.12036	0.19178	0.30738	0	0	0		1	0.0924882	Heterogeneous	Linker, 4 and 5		NA
614	GSK3.alpha.beta_pS21_S9	NDRG1_pT346	0	0.15274	0.17933	0	0.18077	0.23745	0.26595	0	0	0	0		2	0.0923855	Heterogeneous	2		NA
615	IRS1	Paxillin	0	0	0.23321	0.23816	0	0.26094	0.27914	0	0	0	0		1	0.09195	Heterogeneous	Linker, 1 and 3		GAB1 signalosome, Signal Transduction, Signaling by EGFR, Signaling by VEGF, VEGFA-VEGFR2 Pathway
616	Caveolin.1	VEGFR2	0	0.07921	0.19524	0.03376	0.18514	0	0.25433	0.20666	0	0.05673	0		2	0.0919155	Heterogeneous	5		NA
617	Bcl.xL	eEF2	0.09312	0	0.28181	0	0	0.32133	0.20783	0.10529	0	0	0		2	0.0917618	Heterogeneous	Linker, 1 and 6		NA
618	Rb_pS807_S811	YB.1_pS102	0	0.21351	0.16827	0.06003	0	0.2296	0.29705	0	0.04038	0	0		1	0.0917127	Heterogeneous	2		NA
619	Raptor	STAT5.alpha	0.15149	0.06734	0	0	0	0	0	0.17536	0.32806	0.28373	0		1	0.0914527	Heterogeneous	3		Signal Transduction
620	p90RSK	RBM15	0	0	0	0	0.2231	0.29127	0.45025	0	0	0	0.03943		2	0.0912773	Heterogeneous	3		NA
621	Heregulin	SF2	0	0.16407	0.28692	0	0	0.27966	0.20603	0	0.06479	0	0		1	0.0910427	Heterogeneous	4		NA
622	PEA.15	YAP_pS127	0	0	0.03417	0.21555	0.29309	0.09469	0.13154	0	0.06575	0.09748	0.06793		1	0.0909273	Heterogeneous	5		Signal Transduction, Signaling by ERBB4
623	Annexin_VII	N.Ras	0	0.19221	0.09797	0	0	0.12382	0.08723	0.31169	0.07877	0.05559	0.05111		1	0.0907627	Heterogeneous	Linker, 4 and 5		NA
624	E.Cadherin	eEF2K	0	0.06302	0	0	0.10139	0.23042	0.22024	0	0	0.12989	0.25203		1	0.0906355	Heterogeneous	3		Signal Transduction
625	CD20	MIG.6	0.05061	0	0.22345	0.21693	0	0.23455	0.11751	0.21983	0	-0.06911	0		1	0.0903427	Heterogeneous	1		NA
626	ERK2	ETS.1	0	0	0.24222	0.09322	0	0.35912	0.2957	0	0	0	0		2	0.0900236	Heterogeneous	Linker, 1 and 3		Cellular Senescence, Cellular responses to stress, Oncogene Induced Senescence
627	Bcl.2	DJ.1	0.21507	0.04526	0	0.19643	0	0	0	0	0.05239	0	0.47977		2	0.0899018	Heterogeneous	5		NA
628	Collagen_VI	YAP	0.40195	0	0	0	0	0	0	0	0.23794	0.08719	0.25803		1	0.0895555	Heterogeneous	Linker, 5 and 6		Signal Transduction
629	GSK3_pS9	p90RSK_pT359_S363	0	0.29564	0	0	0.227	0	0	0	0.25692	0	0.19722		1	0.0887982	Heterogeneous	2		Axon guidance, Cellular responses to stress, Developmental Biology, Immune System, Innate Immune System, NGF signalling via TRKA from the plasma membrane, Signal Transduction, Signalling by NGF
630	ARID1A	eIF4G	0.10246	0.15377	0.01927	0	0	0.25835	0.27839	0	0.04359	0.05958	0.05944		2	0.0886227	Heterogeneous	Linker, 1 and 3		NA
631	Chk1_pS345	Chk2_pT68	0.24398	0.28895	-0.2075	0	0.20021	0.12398	0.12314	0	0.17859	0.08501	-0.0616		2	0.0886145	Heterogeneous	1		Cell Cycle, Cell Cycle Checkpoints, DNA Double-Strand Break Repair, DNA Repair, G1/S DNA Damage Checkpoints, G2/M Checkpoints, G2/M DNA damage checkpoint, Ubiquitin Mediated Degradation of Phosphorylated Cdc25A, p53-Independent DNA Damage Response, p53-Independent G1/S DNA damage checkpoint
632	MAPK_pT202_Y204	Src_pY416	0	0	0.21365	0.11727	0.24607	0.2173	0	0	0	0.14147	0.03281		1	0.0880518	Heterogeneous	2		ARMS-mediated activation, Axon guidance, Cytokine Signaling in Immune system, DAP12 interactions, DAP12 signaling, Developmental Biology, Downstream signal transduction, Downstream signaling of activated FGFR1, Downstream signaling of activated FGFR2, Downstream signaling of activated FGFR3, Downstream signaling of activated FGFR4, FCERI mediated MAPK activation, FRS-mediated FGFR1 signaling, FRS…
633	ARHI	PR	0.09593	0	0	0.23915	0.10415	0	0.52908	0	0	0	0		1	0.0880282	Heterogeneous	4		NA
634	HER2	PEA15_pS116	0	0	0	0	0.09096	0.36724	0.34326	0.16658	0	0	0		3	0.0880036	Heterogeneous	1		ARMS-mediated activation, Axon guidance, Cytokine Signaling in Immune system, DAP12 interactions, DAP12 signaling, Developmental Biology, Downstream signal transduction, Downstream signaling of activated FGFR1, Downstream signaling of activated FGFR2, Downstream signaling of activated FGFR3, Downstream signaling of activated FGFR4, FCERI mediated MAPK activation, FRS-mediated FGFR1 signaling, FRS…
635	Myosin.IIa_pS1943	VEGFR2	0.09595	0.13362	0	0	0	0.16885	0.10549	0.20657	0.08948	0.0635	0.10397		2	0.0879482	Heterogeneous	5		NA
636	eEF2	eEF2K	0.10618	0.15417	0	0	0.23913	0	0	0.2013	0	0	0.26537		1	0.0878318	Heterogeneous	Linker, 3 and 6		NA
637	eEF2K	GAB2	0	0	0.10024	0.05899	0	0.24511	0.27395	0.02261	0	0	0.26314		2	0.08764	Heterogeneous	3		Signal Transduction
638	ETS.1	YB.1	0.08396	0	0	0.07104	0.07635	0.3766	0.35292	0	0	0	0		2	0.0873518	Heterogeneous	1		NA
639	Claudin.7	Rab.25	0.11182	0	0.10191	0.05737	0.08068	0	0.07084	0	0.35191	0.07307	0.11196		1	0.0872327	Heterogeneous	Linker, 4 and 6		NA
640	Bak	Smad3	0.15467	0	0.4906	0.26193	-0.12908	0	0	0	0.17774	0	0		4	0.0868964	Heterogeneous	1		NA
641	ETS.1	Lck	0.18778	0.10422	0.16698	0	0	0.21722	0.08189	0.0772	0.06008	0.06043	0		2	0.0868909	Heterogeneous	Linker, 1 and 6		NA
642	14.3.3_zeta	Bax	0.0516	0	0	0.06903	0	0	0.07274	0	0.23983	0.30617	0.21525		1	0.0867836	Heterogeneous	Linker, 5 and 6		Apoptosis, Intrinsic Pathway for Apoptosis, Programmed Cell Death
643	Cyclin_D1	GATA3	0	0	0.21442	-0.06552	0	0.10158	0.07149	0.24682	0	0.12445	0.25932		1	0.0865964	Heterogeneous	1		NA
644	Myosin.IIa_pS1943	NF2	0	0.1498	0.11526	0	0.14146	0.07535	0.08366	0.2264	0	0.07987	0.08037		1	0.0865609	Heterogeneous	Linker, 3 and 5		RHO GTPase Effectors, RHO GTPases activate PAKs, Signal Transduction, Signaling by Rho GTPases
645	FOXO3a	SF2	0	0	0.16194	0.09811	0	0.23484	0.21395	0.2387	0	0	0		2	0.08614	Heterogeneous	4		NA
646	GAB2	IRS1	0	0	0.3823	0	0	0.24508	0.25037	0	0	0	0.06773		1	0.0859527	Heterogeneous	Linker, 1 and 3		Cytokine Signaling in Immune system, Disease, Diseases of signal transduction, Fc epsilon receptor (FCERI) signaling, Immune System, Innate Immune System, Interleukin receptor SHC signaling, Interleukin-2 signaling, Interleukin-3, 5 and GM-CSF signaling, Role of LAT2/NTAL/LAB on calcium mobilization, Signal Transduction, Signaling by GPCR, Signaling by Interleukins, Signaling by SCF-KIT
647	HER2_pY1248	PRAS40_pT246	0	0	0.08675	0.29241	0	0	0	-0.0642	0.25162	0.20749	0.16982		1	0.0858082	Heterogeneous	2		Adaptive Immune System, DAP12 interactions, DAP12 signaling, Disease, Diseases of signal transduction, Downstream signal transduction, Downstream signaling events of B Cell Receptor (BCR), Downstream signaling of activated FGFR1, Downstream signaling of activated FGFR2, Downstream signaling of activated FGFR3, Downstream signaling of activated FGFR4, Fc epsilon receptor (FCERI) signaling, GAB1 si…
648	Chk2	S6	0.23539	0	0	0.26977	0	0	0	0.43832	0	0	0		1	0.0857709	Heterogeneous	6		NA
649	Annexin_VII	ARHI	0.19775	0.23141	0	0.26734	0	0	0	0.24603	0	0	0		1	0.0856845	Heterogeneous	Linker, 4 and 5		NA
650	Annexin.1	Fibronectin	0	0	0	0.42919	0	0.32557	0.24622	0	0	0	-0.06294		2	0.0852764	Heterogeneous	Linker, 1 and 5		Gastrin-CREB signalling pathway via PKC and MAPK, Signal Transduction, Signaling by GPCR
651	Stathmin	YAP	0	0	0	0	0.34126	0.26911	0.27256	0	0	0.04834	0		1	0.0846609	Heterogeneous	Linker, 1 and 6		NA
652	14.3.3_epsilon	p27_pT157	0.09153	0	0	0.23904	0	0	0	0.13294	0.23087	0.22355	0		1	0.0834482	Heterogeneous	Linker, 1 and 4		Cell Cycle, Cell Cycle Checkpoints, Cell Cycle, Mitotic, Cellular responses to stress, RHO GTPase Effectors, Signal Transduction, Signaling by Rho GTPases, Signalling by NGF
653	LKB1	TAZ	0	0	0.0801	0.38362	0	0	0.07831	0	0.04762	0.06158	0.26262		1	0.0830773	Heterogeneous	1		Metabolism, Signal Transduction
654	eIF4G	HER3	0	0	0.24919	0	0	0.33276	0.32998	0	0	0	0		2	0.0829027	Heterogeneous	Linker, 1 and 3		Cytokine Signaling in Immune system, IGF1R signaling cascade, IRS-mediated signalling, IRS-related events triggered by IGF1R, Immune System, Insulin receptor signalling cascade, Signal Transduction, Signaling by Insulin receptor, Signaling by Type 1 Insulin-like Growth Factor 1 Receptor (IGF1R)
655	c.Jun_pS73	HER2_pY1248	0	0	0	0.13726	0	0	0.07857	0	0.2407	0.26509	0.18829		1	0.0827191	Heterogeneous	2		FCERI mediated MAPK activation, Fc epsilon receptor (FCERI) signaling, Immune System, Innate Immune System, MAPK family signaling cascades, Signal Transduction
656	BRCA2	HER3_pY1289	0	0	0	0	0	0	0	0	0.3155	0.28716	0.30197		1	0.0822391	Heterogeneous	1		NA
657	ACVRL1	Smad4	0.36095	0.08772	0	0	0	0	0.15563	0	0	0	0.29556		1	0.0818055	Heterogeneous	4		NA
658	ETS.1	PEA.15	0	0	0	0	0	0.48179	0.20229	0	0	0.21535	0		1	0.0817664	Heterogeneous	Linker, 1 and 5		NA
659	CD31	PDK1	0	0	0	0.11899	0	0	0	0	0.26286	0.23947	0.27778		2	0.0817364	Heterogeneous	Linker, 3 and 4		NA
660	JNK2	PDK1_pS241	0.17336	0.11009	0	0.13589	0.17952	0.06435	0	0	0.06898	0	0.16551		1	0.0816091	Heterogeneous	3		NA
661	14.3.3_zeta	DJ.1	0	0	0.10751	0	0.15223	0.26329	0.28279	0.08899	0	0	0		2	0.0813464	Heterogeneous	Linker, 5 and 6		NA
662	HER3	Tuberin	0.01869	0	0	0	0	0.54042	0.33544	0	0	0	0		1	0.0813227	Heterogeneous	Linker, 1 and 3		Adaptive Immune System, DAP12 interactions, DAP12 signaling, Disease, Diseases of signal transduction, Downstream signal transduction, Downstream signaling events of B Cell Receptor (BCR), Downstream signaling of activated FGFR1, Downstream signaling of activated FGFR2, Downstream signaling of activated FGFR3, Downstream signaling of activated FGFR4, Fc epsilon receptor (FCERI) signaling, GAB1 si…
663	ARHI	FOXO3a	0	0	0	0.02734	0	0.32423	0.27239	0.26859	0	0	0		1	0.0811409	Heterogeneous	4		NA
664	BRCA2	FOXO3a_pS318_S321	0	0	0	0	0.07946	0.06751	0	0	0.46871	0.22703	0.04724		1	0.0809045	Heterogeneous	Linker, 1 and 5		NA
665	c.Jun_pS73	PRAS40_pT246	0	0.19917	0.1511	0.20045	0	0	0	0	0.02555	0.27036	0.04263		2	0.0808418	Heterogeneous	2		Cellular responses to stress, Fc epsilon receptor (FCERI) signaling, Immune System, Innate Immune System, Signal Transduction
666	Raptor	RBM15	0	0.32716	0	0	0.10878	0	0	0.22356	0	0.22399	0		1	0.0803173	Heterogeneous	3		NA
667	mTOR_pS2448	PDCD4	0	0.16624	0	0	0	0	0.43913	0	0.27766	0	0		1	0.0802755	Heterogeneous	2		NA
668	B.Raf	GSK3.alpha.beta	0.29597	0	0	0	0.16781	0	0	0.25189	0	0	0.16343		1	0.0799182	Heterogeneous	3		Axon guidance, DAP12 interactions, DAP12 signaling, Developmental Biology, Downstream signal transduction, Downstream signaling of activated FGFR1, Downstream signaling of activated FGFR2, Downstream signaling of activated FGFR3, Downstream signaling of activated FGFR4, Fc epsilon receptor (FCERI) signaling, Immune System, Innate Immune System, NGF signalling via TRKA from the plasma membrane, Si…
669	HER2_pY1248	NF.kB.p65_pS536	0	0	0.34729	0	0	0.2794	0.25157	0	0	0	0		1	0.0798418	Heterogeneous	2		Adaptive Immune System, Cytokine Signaling in Immune system, Developmental Biology, Disease, Downstream signaling events of B Cell Receptor (BCR), Fc epsilon receptor (FCERI) signaling, Immune System, Innate Immune System, Signal Transduction, Signaling by Interleukins, Signaling by the B Cell Receptor (BCR), Signalling by NGF
670	eIF4G	Paxillin	0.08242	0	0.09315	0.23354	0	0	0.2284	0	0	0	0.23814		1	0.0796045	Heterogeneous	3		Signal Transduction
671	PREX1	Syk	0	0	0.10445	0.17776	0.32197	-0.14647	0.08179	0	0.20564	0.06489	0.06551		2	0.0795945	Heterogeneous	6		NA
672	CDK1	FoxM1	0.19789	0.26965	0.23409	0	0	0	0.08085	0	0	0	0.08812		1	0.0791455	Heterogeneous	6		Cell Cycle, Cell Cycle, Mitotic, Cyclin A/B1 associated events during G2/M transition, G2/M Transition, Mitotic G2-G2/M phases
673	p38_MAPK	PREX1	0	0.02266	0.20076	0.21739	0.10561	0	0.08106	0	0.13485	0.07061	0.03551		2	0.07895	Heterogeneous	6		NA
674	ER.alpha_pS118	SF2	0	0	0	0.28833	0.15108	0.195	0.17145	0	0	0.05816	0		1	0.0785473	Heterogeneous	Linker, 1 and 4		NA
675	A.Raf_pS299	ARHI	-0.0948	0	0.30709	0.10776	0	0	0.21619	0.32598	0	0	0		1	0.0783836	Heterogeneous	4		NA
676	Chk1	PCNA	0	0	0	0	0.11919	0.28257	0.45941	0	0	0	0		1	0.0782882	Heterogeneous	Linker, 3 and 6		Cell Cycle, DNA Double-Strand Break Repair, DNA Repair, HDR through Homologous Recombination (HR) or Single Strand Annealing (SSA), HDR through Homologous Recombination (HRR), Homology Directed Repair
677	EGFR_pY1068	NF.kB.p65_pS536	0	0	0	0	0.09195	0.24439	0.25039	0	0	0	0.27312		1	0.0781682	Heterogeneous	2		Adaptive Immune System, Cytokine Signaling in Immune system, Developmental Biology, Disease, Downstream signaling events of B Cell Receptor (BCR), Fc epsilon receptor (FCERI) signaling, Immune System, Innate Immune System, Signal Transduction, Signaling by Interleukins, Signaling by the B Cell Receptor (BCR), Signalling by NGF
678	PDK1	Smad4	0	0	0	0.09056	0	0	0	0	0.25859	0.22995	0.27683		1	0.0778118	Heterogeneous	Linker, 3 and 4		Signal Transduction
679	GSK3_pS9	YB.1_pS102	0	0.26216	0.24897	0	0	0	0.29503	0.04942	0	0	0		1	0.07778	Heterogeneous	2		NA
680	BRCA2	N.Cadherin	-0.08578	0	0	-0.08051	0.15299	0	0	0	0.3081	0.33078	0.22905		2	0.0776936	Heterogeneous	1		NA
681	ETS.1	HER2	0	0	0	0	0.10489	0.32328	0.25398	0.1669	0	0	0		1	0.0771864	Heterogeneous	1		NA
682	eEF2K	HER3	0.0906	0	0.08982	0.03666	0	0.35007	0.27052	0	0	0	0		2	0.0761518	Heterogeneous	Linker, 1 and 3		IGF1R signaling cascade, IRS-mediated signalling, IRS-related events triggered by IGF1R, Insulin receptor signalling cascade, Signal Transduction, Signaling by Insulin receptor, Signaling by Type 1 Insulin-like Growth Factor 1 Receptor (IGF1R)
683	FOXO3a	SCD1	0.09105	0.11766	0	0	0	0.3878	0.19691	0.09865	0	0	-0.05485		1	0.0761109	Heterogeneous	4		NA
684	EGFR_pY1068	HER3_pY1289	0.20961	0.1938	0.08323	0.08882	0	0.18361	0.07266	0	0	0	0		1	0.0756118	Heterogeneous	Linker, 1 and 2		ARMS-mediated activation, Adaptive Immune System, Axon guidance, Constitutive Signaling by Aberrant PI3K in Cancer, Cytokine Signaling in Immune system, DAP12 interactions, DAP12 signaling, Developmental Biology, Disease, Diseases of signal transduction, Downstream signal transduction, Downstream signaling events of B Cell Receptor (BCR), Downstream signaling of activated FGFR1, Downstream signal…
685	ER.alpha	N.Ras	0	0	0	0	0	0.345	0.27196	0.1256	0	0.08416	0		1	0.0751564	Heterogeneous	Linker, 1 and 4		Signal Transduction, Signaling by ERBB4
686	HER2_pY1248	Src_pY527	0	0	0	0	0	0	0	0	0.291	0.29675	0.23029		3	0.0743673	Heterogeneous	2		ARMS-mediated activation, Adaptive Immune System, Axon guidance, Cytokine Signaling in Immune system, DAP12 interactions, DAP12 signaling, Developmental Biology, Downstream signal transduction, Downstream signaling of activated FGFR1, Downstream signaling of activated FGFR2, Downstream signaling of activated FGFR3, Downstream signaling of activated FGFR4, FCERI mediated MAPK activation, FRS-media…
687	Bak	FOXO3a	0.0989	0.20145	0	0	0.26513	0	0	0.24999	0	0	0		1	0.0741336	Heterogeneous	Linker, 1 and 4		NA
688	c.Myc	CD20	0	0	0	0	0.24859	0	0	0.22049	0.25279	0.03209	0.06141		2	0.0741245	Heterogeneous	1		NA
689	Collagen_VI	Stathmin	0	0	0	0.60785	0	0	0	0	0	0	0.20694		1	0.0740718	Heterogeneous	Linker, 1 and 5		NA
690	PTEN	RBM15	0.12318	0	0	0.25241	0	0	0	0.14977	0	0.08847	0.20071		3	0.0740491	Heterogeneous	Linker, 3 and 6		NA
691	p53	Stathmin	0.40909	0	0.14592	0	0.25656	0	0	0	0	0	0		1	0.0737791	Heterogeneous	1		NA
692	GSK3.alpha.beta_pS21_S9	p90RSK_pT359_S363	0	0.3187	0	0	0.28382	0	0	0	0	0	0.20726		1	0.0736164	Heterogeneous	2		Axon guidance, Cellular responses to stress, Developmental Biology, Immune System, Innate Immune System, NGF signalling via TRKA from the plasma membrane, Signal Transduction, Signalling by NGF
693	Rad51	TAZ	0	0	0	0	0.1261	0	0	0.18074	0.29866	0	0.20366		1	0.07356	Heterogeneous	1		NA
694	CD31	LKB1	0.19397	0.09018	0	0.42269	0.1007	0	0	0	0	0	0		1	0.0734127	Heterogeneous	Linker, 1 and 4		NA
695	B.Raf	C.Raf	0	0.10651	0.09931	0	0	0.26508	0.27141	0	0	0.06141	0		1	0.0730655	Heterogeneous	Linker, 3 and 5		ARMS-mediated activation, Activation of NMDA receptor upon glutamate binding and postsynaptic events, Axon guidance, CREB phosphorylation through the activation of Ras, Cytokine Signaling in Immune system, DAP12 interactions, DAP12 signaling, Developmental Biology, Downstream signal transduction, Downstream signaling of activated FGFR1, Downstream signaling of activated FGFR2, Downstream signalin…
696	CD49b	PAI.1	0	0	0.12779	0.18	0.09556	0.06936	0.06708	0	0.12093	0.09745	0.04454		1	0.0729736	Heterogeneous	5		ECM proteoglycans, Extracellular matrix organization, Hemostasis
697	Beclin	Mre11	0.19215	0.1883	0.20051	0.22026	0	0	0	0	0	0	0		1	0.0728382	Heterogeneous	1		Cellular responses to stress
698	Annexin_VII	PRDX1	0	0.15722	0.13095	0.19375	0	0	0	0.23708	0	0.07511	0		1	0.0721918	Heterogeneous	5		NA
699	GAB2	HER3	0	0	0	0	0	0.51284	0.28113	0	0	0	0		1	0.0721791	Heterogeneous	Linker, 1 and 3		Cytokine Signaling in Immune system, Disease, Diseases of signal transduction, Fc epsilon receptor (FCERI) signaling, Immune System, Innate Immune System, Interleukin receptor SHC signaling, Interleukin-2 signaling, Interleukin-3, 5 and GM-CSF signaling, Role of LAT2/NTAL/LAB on calcium mobilization, Signal Transduction, Signaling by GPCR, Signaling by Interleukins, Signaling by SCF-KIT
700	ERK2	PEA15_pS116	0	0	0.22022	0	0	0.30817	0.26211	0	0	0	0		1	0.0718636	Heterogeneous	Linker, 1 and 3		ARMS-mediated activation, Axon guidance, Cytokine Signaling in Immune system, DAP12 interactions, DAP12 signaling, Developmental Biology, Downstream signal transduction, Downstream signaling of activated FGFR1, Downstream signaling of activated FGFR2, Downstream signaling of activated FGFR3, Downstream signaling of activated FGFR4, FCERI mediated MAPK activation, FRS-mediated FGFR1 signaling, FRS…
701	p70S6K_pT389	S6_pS240_S244	0	0.17317	0	0.09404	0.25455	0	0.07255	0.07506	0	0.05992	0.05742		1	0.0715191	Heterogeneous	2		IGF1R signaling cascade, IRS-mediated signalling, IRS-related events triggered by IGF1R, Insulin receptor signalling cascade, PI3K Cascade, PKB-mediated events, Signal Transduction, Signaling by Insulin receptor, Signaling by Type 1 Insulin-like Growth Factor 1 Receptor (IGF1R), mTOR signalling, mTORC1-mediated signalling
702	HER2_pY1248	Tuberin_pT1462	0	0	0	0	0	0	0	0	0.53711	0.24911	0		1	0.0714745	Heterogeneous	2		Adaptive Immune System, DAP12 interactions, DAP12 signaling, Disease, Diseases of signal transduction, Downstream signal transduction, Downstream signaling events of B Cell Receptor (BCR), Downstream signaling of activated FGFR1, Downstream signaling of activated FGFR2, Downstream signaling of activated FGFR3, Downstream signaling of activated FGFR4, Fc epsilon receptor (FCERI) signaling, GAB1 si…
703	Bak	Caspase.7_cleavedD198	0	0	0	0	0.36093	0	0	0.359	0.06552	0	0		1	0.0714045	Heterogeneous	Linker, 1 and 6		Apoptosis, Intrinsic Pathway for Apoptosis, Programmed Cell Death
704	FOXO3a	PR	-0.08916	0	0.06341	0.02139	0	0.22775	0.24198	0.31845	0	0	0		2	0.0712564	Heterogeneous	4		Signal Transduction, Signaling by ERBB4
705	Bcl.xL	Bid	0.13784	0.0773	0.25452	0.07321	0	0	0.08148	0.15668	0	0	0		1	0.0710027	Heterogeneous	1		Apoptosis, BH3-only proteins associate with and inactivate anti-apoptotic BCL-2 members, Intrinsic Pathway for Apoptosis, Programmed Cell Death
706	CD20	N.Cadherin	0.26533	0	0.24029	0	0.11737	0	0	0	0.02786	0.12713	0		1	0.0707255	Heterogeneous	1		NA
707	A.Raf_pS299	FOXO3a	0	0	0	0	0	0.23199	0.26282	0.20466	0	0	0.07733		1	0.0706182	Heterogeneous	4		DAP12 interactions, DAP12 signaling, Developmental Biology, Downstream signal transduction, Downstream signaling of activated FGFR1, Downstream signaling of activated FGFR2, Downstream signaling of activated FGFR3, Downstream signaling of activated FGFR4, Fc epsilon receptor (FCERI) signaling, Immune System, Innate Immune System, MAPK family signaling cascades, NGF signalling via TRKA from the pl…
708	Cyclin_B1	FASN	0	0	0.16228	0	0.15877	0.20411	0.25137	0	0	0	0		2	0.0705936	Heterogeneous	6		NA
709	ER.alpha_pS118	PR	0.16636	0.15675	0.19651	0	0.09075	0	0.08595	0	0.07974	0	0		2	0.0705509	Heterogeneous	Linker, 1 and 4		Gene Expression, Generic Transcription Pathway, Nuclear Receptor transcription pathway, Nuclear signaling by ERBB4, Signal Transduction, Signaling by ERBB4
710	Bid	LKB1	0.01895	0	0.35462	0.24668	0.15272	0	0	0	0	0	0		1	0.07027	Heterogeneous	1		NA
711	AR	c.Met_pY1235	0	0	0	0	0	0.26023	0.23867	0	0	0	0.27324		1	0.0701945	Heterogeneous	1		NA
712	N.Cadherin	p27_pT157	0	0	0.1643	0.48811	0.0283	0	0.09063	0	0	0	0		1	0.0701218	Heterogeneous	1		NA
713	Annexin.1	EGFR	0.47927	0	0	0.26176	0	0	0	0	0.02983	0	0		1	0.0700782	Heterogeneous	Linker, 1 and 5		Gastrin-CREB signalling pathway via PKC and MAPK, Signal Transduction, Signaling by GPCR
714	EGFR	HER2_pY1248	0	0.06083	0	0	0	0	0.18547	0.33046	0.08745	0	0.10528		1	0.0699536	Heterogeneous	Linker, 1 and 2		ARMS-mediated activation, Adaptive Immune System, Axon guidance, Constitutive Signaling by Aberrant PI3K in Cancer, Cytokine Signaling in Immune system, DAP12 interactions, DAP12 signaling, Developmental Biology, Disease, Diseases of signal transduction, Downstream signal transduction, Downstream signaling events of B Cell Receptor (BCR), Downstream signaling of activated FGFR1, Downstream signal…
715	Caveolin.1	CD31	0.08658	0	0	0	0	0.13402	0.08949	0	0.17172	0.22378	0.06372		1	0.0699373	Heterogeneous	Linker, 4 and 5		Cell surface interactions at the vascular wall, Hemostasis
716	4E.BP1_pS65	FOXO3a_pS318_S321	0	0	0.11422	0	0	0.28589	0.23293	0	0	0	0.13509		2	0.06983	Heterogeneous	5		Signal Transduction
717	Bid	IRS1	0	0.1896	0	0	0	-0.06691	0	0.07029	0.29567	0.2203	0.05491		1	0.0694418	Heterogeneous	1		NA
718	Beclin	p53	0.19672	0.09123	0	0	0.20147	0	0	0.27387	0	0	0		1	0.06939	Heterogeneous	1		Cellular responses to stress
719	p90RSK_pT359_S363	S6_pS235_S236	0	0	0.29301	0	0.12381	0.23854	0.10745	0	0	0	0		2	0.0693464	Heterogeneous	2		Signal Transduction
720	Bak	Notch1	0.10049	0.32003	0	0	0.09543	0	0	0	0.19271	0	0.04793		1	0.0687809	Heterogeneous	1		NA
721	MAPK_pT202_Y204	Shc_pY317	0	0.13963	0.11149	0.05871	0.40304	0	0	0	0	0.04193	0		1	0.0686182	Heterogeneous	2		ARMS-mediated activation, Axon guidance, Cytokine Signaling in Immune system, DAP12 interactions, DAP12 signaling, Developmental Biology, Downstream signal transduction, Downstream signaling of activated FGFR1, Downstream signaling of activated FGFR2, Downstream signaling of activated FGFR3, Downstream signaling of activated FGFR4, FCERI mediated MAPK activation, FRS-mediated FGFR1 signaling, FRS…
722	FOXO3a_pS318_S321	Rictor	-0.06706	0.15189	0	0	0.17394	0.2371	0.25528	0	0	0	0		1	0.0682864	Heterogeneous	5		Adaptive Immune System, Constitutive Signaling by AKT1 E17K in Cancer, DAP12 interactions, DAP12 signaling, Disease, Diseases of signal transduction, Downstream signal transduction, Downstream signaling events of B Cell Receptor (BCR), Downstream signaling of activated FGFR1, Downstream signaling of activated FGFR2, Downstream signaling of activated FGFR3, Downstream signaling of activated FGFR4,…
723	c.Myc	HSP70	0	0	0.15429	0.22842	0.3683	0	0	0	0	0	0		1	0.0682736	Heterogeneous	1		Disease, Gene Expression
724	TSC1	VEGFR2	0	0	0.10874	0.27021	0.16537	0	0.10195	0.1037	0	0	0		1	0.0681791	Heterogeneous	Linker, 3 and 5		NA
725	p90RSK_pT359_S363	PDCD4	0.09169	0.21736	0	0	0	0.21776	0	0.11772	0.05652	0.04733	0		1	0.0680345	Heterogeneous	2		NA
726	Bcl.xL	Bim	0.09684	0.2018	0.14248	0	0.09297	0.06873	0.06283	0	0.07918	0	0		1	0.0677118	Heterogeneous	Linker, 1 and 5		Apoptosis, BH3-only proteins associate with and inactivate anti-apoptotic BCL-2 members, Intrinsic Pathway for Apoptosis, Programmed Cell Death
727	Ku80	NF2	0.19016	0	0.13009	0.25998	0	0	0	0.11517	0	0.04921	0		1	0.0676918	Heterogeneous	3		NA
728	CD31	G6PD	0	0	0.28756	0	0	0	0.45317	0	0	0	0		1	0.0673391	Heterogeneous	Linker, 4 and 5		NA
729	RBM15	Smad3	0	0	0.29005	0.56753	0	0	0	0	0	-0.11788	0		1	0.0672455	Heterogeneous	Linker, 1 and 3		NA
730	Cyclin_B1	Rb_pS807_S811	0	0	0.0697	0	0.09666	0.26363	0.19866	0	0.07174	0	0.03632		1	0.0669736	Heterogeneous	Linker, 2 and 6		Cell Cycle, Cell Cycle, Mitotic, Condensation of Prophase Chromosomes, E2F mediated regulation of DNA replication, G1/S Transition, M Phase, Mitotic G1-G1/S phases, Mitotic Prophase
731	Cyclin_E2	p27_pT157	0	0	0	0	0	0	0	0.035	0.2634	0.21597	0.221		3	0.0668518	Heterogeneous	1		Cell Cycle, Cell Cycle Checkpoints, Cell Cycle, Mitotic, Cellular Senescence, Cellular responses to stress, Cyclin A:Cdk2-associated events at S phase entry, DNA Damage/Telomere Stress Induced Senescence, G1/S DNA Damage Checkpoints, G1/S Transition, Mitotic G1-G1/S phases, S Phase, SCF(Skp2)-mediated degradation of p27/p21, p53-Dependent G1 DNA Damage Response, p53-Dependent G1/S DNA damage chec…
732	XBP1	YB.1	0.09727	0.23306	0	0	0.21887	0	0	0.07439	0.06469	0.03933	0		1	0.0661464	Heterogeneous	1		NA
733	BRCA2	XRCC1	0.08458	0.08505	0.20413	0.232	0.12102	0	0	0	0	0	0		1	0.0660709	Heterogeneous	Linker, 1 and 4		DNA Double-Strand Break Repair, DNA Repair, Homology Directed Repair
734	Bax	PDK1	0.06062	0	0	0	0	0	0	0	0.09005	0.31606	0.259		1	0.0659755	Heterogeneous	Linker, 3 and 5		NA
735	CD31	p53	0.19891	0.16149	0.16505	0	0	0	0	0.227	-0.02727	0	0		2	0.0659255	Heterogeneous	Linker, 1 and 4		Hemostasis
736	Cyclin_E2	ER.alpha_pS118	0	0	0.11825	0.32736	0.21412	0	0	0	0	0	0.06491		2	0.0658764	Heterogeneous	1		NA
737	p27_pT157	XRCC1	0	0.31986	0	0	0.17899	0.08766	0	0	0	0.13758	0		1	0.0658264	Heterogeneous	Linker, 1 and 4		NA
738	IRS1	Notch1	0.08569	0.17985	0.0969	0	0	0	0	0	0.28332	0.07715	0		1	0.0657191	Heterogeneous	1		Developmental Biology, Disease, Diseases of signal transduction, Signal Transduction
739	Cyclin_D1	EGFR_pY1173	0.22442	0.26709	0	0	0	0.03015	0.16755	0	0	0	0.03312		1	0.0656664	Heterogeneous	1		Signal Transduction
740	Chk2_pT68	N.Cadherin	0	0	0	0	0	0	0	0	0.35633	0.11404	0.25164		2	0.0656373	Heterogeneous	1		NA
741	HER3	Smad4	0	-0.08432	0.1395	0.1025	0.22323	0	-0.06984	0.22773	0	0.10209	0.07996		1	0.0655318	Heterogeneous	Linker, 1 and 4		Developmental Biology, Disease, Diseases of signal transduction, Signal Transduction
742	Akt_pS473	JNK_pT183_Y185	0.071	0.2389	0	0	0	0.13179	0.20276	0	0	0	0.07615		1	0.0655091	Heterogeneous	2		Activation of BH3-only proteins, Apoptosis, Fc epsilon receptor (FCERI) signaling, Immune System, Innate Immune System, Intrinsic Pathway for Apoptosis, Programmed Cell Death, Signal Transduction, Signalling by NGF
743	PEA.15	TAZ	0	0.0831	0	0	0	0.33924	0.22184	0	0	0.07637	0		2	0.0655045	Heterogeneous	Linker, 1 and 5		Signal Transduction
744	CD20	Stathmin	0	0	0	0	0.29009	0	0.19564	0.23455	0	0	0		1	0.06548	Heterogeneous	1		NA
745	Collagen_VI	p21	0	0.20605	0	0	0	0.25668	0	0.25727	0	0	0		1	0.0654545	Heterogeneous	Linker, 1 and 5		Signal Transduction, Signaling by PDGF
746	14.3.3_epsilon	SCD1	0	0.0686	0.20688	0	0	0	0	0	0.24738	0.19627	0		1	0.0653755	Heterogeneous	4		NA
747	Bid	Notch1	0.27227	0.15652	0	0	0.08598	-0.05317	0	0	0.25482	0	0		2	0.0651291	Heterogeneous	1		NA
748	Akt	Dvl3	0.18274	0	0	0.1846	0	0.05364	0.29319	0	0	0	0		1	0.0649245	Heterogeneous	3		Signal Transduction, Signaling by Wnt, TCF dependent signaling in response to WNT
749	N.Ras	Rab.25	0	0	0.09904	0	0.24346	0	0	0.36941	0	0	0		1	0.0647191	Heterogeneous	4		NA
750	ER.alpha	N.Cadherin	0	0	0	0.29806	0	0	0	0	0.13919	0.27316	0		1	0.0645827	Heterogeneous	1		NA
751	B.Raf	JNK2	0	0	0.06431	0.07876	0.18241	0	0	0.08765	0.13769	0	0.15917		1	0.0645445	Heterogeneous	3		FCERI mediated MAPK activation, Fc epsilon receptor (FCERI) signaling, Immune System, Innate Immune System
752	INPP4B	XBP1	0	0.27372	0	0	0.21389	0	0	0.09962	0	0	0.12261		2	0.0645309	Heterogeneous	1		NA
753	eEF2	PCNA	0	0	0	0	0	0.26022	0.32839	0.1197	0	0	0		1	0.0643918	Heterogeneous	6		NA
754	Collagen_VI	LKB1	0	0	0.18226	0.32439	0	0	0	0	0	0	0.20053		1	0.0642891	Heterogeneous	Linker, 1 and 5		Signal Transduction
755	CD31	SCD1	0.18435	0.22946	0.29322	0	0	0	0	0	0	0	0		2	0.0642755	Heterogeneous	4		NA
756	RBM15	Syk	0.17554	0.22815	0	0	0	0.12605	0.1494	0	0	0	0.02766		2	0.0642545	Heterogeneous	Linker, 3 and 6		NA
757	Chk1	Cyclin_E2	0	0	-0.09717	0	0.212	0	0	0.25196	0.33808	0	0		1	0.0640791	Heterogeneous	Linker, 1 and 3		Cell Cycle, Cell Cycle Checkpoints, G1/S DNA Damage Checkpoints
758	14.3.3_zeta	PRDX1	0.06724	0.13532	0	0.12746	0.22251	0.05421	0	0.09803	0	0	0		1	0.06407	Heterogeneous	Linker, 5 and 6		Gene Expression, Generic Transcription Pathway, TP53 Regulates Metabolic Genes, Transcriptional Regulation by TP53
759	Cyclin_D1	MIG.6	0	0	0.30124	0	0	0.2095	0.19304	0	0	0	0		1	0.06398	Heterogeneous	1		NA
760	HER2	HER3	0.02328	0.06322	0.15966	0.26579	0	0	0.16445	-0.02503	0.05205	0	0		1	0.0639473	Heterogeneous	1		ARMS-mediated activation, Adaptive Immune System, Axon guidance, Constitutive Signaling by Aberrant PI3K in Cancer, Cytokine Signaling in Immune system, DAP12 interactions, DAP12 signaling, Developmental Biology, Disease, Diseases of signal transduction, Downregulation of ERBB2:ERBB3 signaling, Downstream signal transduction, Downstream signaling events of B Cell Receptor (BCR), Downstream signal…
761	ARHI	Rab.25	0	0	0.08939	0	0.23046	0	0	0.38075	0	0	0		2	0.0636909	Heterogeneous	4		NA
762	mTOR_pS2448	p70S6K_pT389	0.08917	0.20765	0.11814	0.2053	0	0	0	0.05871	0.02038	0	0		1	0.0635773	Heterogeneous	2		IGF1R signaling cascade, IRS-mediated signalling, IRS-related events triggered by IGF1R, Insulin receptor signalling cascade, PI3K Cascade, PKB-mediated events, Signal Transduction, Signaling by Insulin receptor, Signaling by Type 1 Insulin-like Growth Factor 1 Receptor (IGF1R), mTOR signalling, mTORC1-mediated signalling
763	Dvl3	RBM15	0.2381	0	0	0	0	0	0	0.24216	0	0	0.21838		2	0.0635127	Heterogeneous	3		NA
764	ER.alpha_pS118	Smad3	0.08179	0	0.10627	0.38507	0	0	0	0	0	0.11969	0		1	0.0629836	Heterogeneous	1		Gene Expression, Generic Transcription Pathway, Signal Transduction
765	Smad4	XRCC1	0	0.14258	0	0	0.20586	0	0.06486	0.26708	0	0	0.01128		1	0.0628782	Heterogeneous	4		NA
766	Collagen_VI	FOXO3a_pS318_S321	0	0	0.08288	0.0195	0	0.24021	0.22827	0	0	0	0.12053		1	0.0628536	Heterogeneous	5		Developmental Biology, Signal Transduction, Signaling by PDGF
767	Bap1.c.4	p62.LCK.ligand	0.16433	0.01755	0.09403	0	0	0.20116	0.23103	-0.02425	0	0	0.00707		1	0.0628109	Heterogeneous	3		NA
768	ACC1	mTOR	0	0	0	0.43595	0	0	0	0.2526	0	0	0		1	0.0625955	Heterogeneous	Linker, 3 and 6		Disease
769	Dvl3	GAB2	0	0	0.16917	0	0	0.27473	0.24433	0	0	0	0		1	0.0625664	Heterogeneous	3		Signal Transduction
770	N.Ras	P.Cadherin	0.14527	0	0.32441	0.29541	0	0	0.07534	0	0	0	-0.15273		2	0.0625182	Heterogeneous	4		NA
771	AR	N.Cadherin	-0.10898	0	0	0	0	0	0	0.06913	0.04797	0.36458	0.31382		1	0.0624109	Heterogeneous	1		NA
772	eEF2	S6	0.21423	0.144	-0.1474	0	0.16979	0	0	0.22224	0.08288	0	0		1	0.06234	Heterogeneous	6		Disease, Eukaryotic Translation Elongation, Gene Expression, Infectious disease, Metabolism of proteins, Peptide chain elongation, Translation
773	MEK1_pS217_S221	PKC.pan_BetaII_pS660	0.10847	0.24424	0.17556	0	0.23081	0	0	0	-0.07443	0	0		1	0.0622409	Heterogeneous	2		Immune System, Signal Transduction, Signaling by GPCR, Signaling by VEGF, VEGFA-VEGFR2 Pathway, VEGFR2 mediated cell proliferation
774	A.Raf_pS299	PR	0	-0.09784	0	0	0	0.35549	0.2889	0.1376	0	0	0		2	0.0621955	Heterogeneous	4		Signal Transduction, Signaling by ERBB4
775	E.Cadherin	p90RSK	0	0	0.15647	0	0.03158	0.26247	0.22857	0	0	0	0		2	0.0617355	Heterogeneous	3		Immune System, Signal Transduction
776	ACVRL1	LKB1	0	0	0.15937	0.26355	0	0	0	0	0	0	0.25519		1	0.0616464	Heterogeneous	Linker, 1 and 4		NA
777	Bid	Caspase.7_cleavedD198	0	0.08417	0	0	0.20678	0.11956	0	0.26168	0	0	0		1	0.0611082	Heterogeneous	Linker, 1 and 6		Apoptosis, Intrinsic Pathway for Apoptosis, Programmed Cell Death
778	GAPDH	PCNA	0	0.08118	0	0.09876	0	0.17227	0.21462	0	0.07727	0	0.02801		1	0.0611009	Heterogeneous	6		NA
779	Akt_pS473	p70S6K_pT389	0.09446	0.15009	0	0.19104	0.10971	0	0	0	0.04414	0.08253	0		2	0.0610882	Heterogeneous	2		IGF1R signaling cascade, IRS-mediated signalling, IRS-related events triggered by IGF1R, Insulin receptor signalling cascade, PI3K Cascade, PKB-mediated events, Signal Transduction, Signaling by Insulin receptor, Signaling by Type 1 Insulin-like Growth Factor 1 Receptor (IGF1R), mTOR signalling
780	Ku80	VHL	0	0	0	0	0	0	0	0.07018	0.31681	0.27971	0		1	0.0606091	Heterogeneous	3		Immune System
781	Bap1.c.4	FASN	0	0	0	0.24968	0.02227	0.1529	0	0.24042	0	0	0		1	0.0604791	Heterogeneous	Linker, 3 and 6		NA
782	eIF4G	Notch1	-0.09576	0	0.22272	0.05653	0	0.26015	0.21718	0	0	0	0		1	0.0600745	Heterogeneous	Linker, 1 and 3		Gene Expression, Signal Transduction
783	S6	Smad1	0.09891	0	0	0	0	0.28772	0.2397	0	0.03308	0	0		1	0.0599464	Heterogeneous	Linker, 1 and 6		Signal Transduction
784	HER3_pY1289	p70S6K_pT389	0	0	0	0	0.21738	0	0.43898	0	0	0	0		1	0.0596691	Heterogeneous	Linker, 1 and 2		IGF1R signaling cascade, IRS-mediated signalling, IRS-related events triggered by IGF1R, Insulin receptor signalling cascade, Signal Transduction, Signaling by Insulin receptor, Signaling by Type 1 Insulin-like Growth Factor 1 Receptor (IGF1R)
785	Bax	DJ.1	0	0	0.14454	0	0	0	0	0	0.03943	0.21279	0.2585		2	0.0595691	Heterogeneous	5		NA
786	HER2	INPP4B	0.35204	0	0	0.28244	0	0	0	0	0.02011	0	0		1	0.0595082	Heterogeneous	1		NA
787	GAPDH	PEA15_pS116	0	0	0.35995	0	0	0.29163	0	0	0	0	0		1	0.0592345	Heterogeneous	Linker, 1 and 6		NA
788	eEF2	P.Cadherin	0.13443	0.1067	0	-0.28206	0.20175	0	0	0.09913	0.2389	0.07541	0.07702		1	0.0592073	Heterogeneous	Linker, 4 and 6		NA
789	AR	ER.alpha_pS118	0.26655	0.15888	0.22439	0	0	0	0	0	0	0	0		1	0.0590745	Heterogeneous	1		Gene Expression, Generic Transcription Pathway, Nuclear Receptor transcription pathway, Signal Transduction
790	FOXO3a_pS318_S321	Mre11	0	0.07985	0	0	0	0.07136	0	0	0.24288	0.25274	0		1	0.0588027	Heterogeneous	Linker, 1 and 5		Immune System, Innate Immune System
791	c.Myc	Collagen_VI	0.09765	0	0	0.33204	0	0.05767	0.07965	0.07786	0	0	0		1	0.0586245	Heterogeneous	Linker, 1 and 5		Signal Transduction
792	MIG.6	PAI.1	0.07115	0.17352	0.11779	0.0665	0	0.0635	0.09956	0	0.05162	0	0		1	0.0585127	Heterogeneous	Linker, 1 and 5		NA
793	FASN	SCD1	0.11636	0	0.17714	0.17585	0	0	0.07776	0	0	0.09342	0		1	0.05823	Heterogeneous	Linker, 4 and 6		Fatty Acyl-CoA Biosynthesis, Fatty acid, triacylglycerol, and ketone body metabolism, Metabolism, Metabolism of lipids and lipoproteins, Triglyceride Biosynthesis
794	Bap1.c.4	HER3	0	-0.19449	0.18009	0.0252	0	0.33474	0.29383	0	0	0	0		2	0.0581245	Heterogeneous	Linker, 1 and 3		NA
795	ACVRL1	Rab.25	0	0.1315	0.06593	-0.07647	0.25578	0	0	0.26199	0	0	0		1	0.0580664	Heterogeneous	4		NA
796	Dvl3	eEF2K	0.11484	0	0	0	0	0.24666	0.27534	0	0	0	0		1	0.0578945	Heterogeneous	3		Signal Transduction
797	Beclin	YB.1	0	0.34042	0	0	0.2262	0	0	0	0	0	0.06806		1	0.0576982	Heterogeneous	1		NA
798	MEK1	Src_pY527	0.14395	0.09074	0.0844	0.08594	0.11023	0	0.11645	0	0	0	0		1	0.0574282	Heterogeneous	2		ARMS-mediated activation, Axon guidance, Cytokine Signaling in Immune system, DAP12 interactions, DAP12 signaling, Developmental Biology, Downstream signal transduction, Downstream signaling of activated FGFR1, Downstream signaling of activated FGFR2, Downstream signaling of activated FGFR3, Downstream signaling of activated FGFR4, FCERI mediated MAPK activation, FRS-mediated FGFR1 signaling, FRS…
799	Caveolin.1	YAP_pS127	0.02296	0.05053	0	0.22467	0	0.05538	0	0	0	0.13142	0.14594		1	0.0573545	Heterogeneous	5		Metabolism, Metabolism of lipids and lipoproteins, Signal Transduction
800	eEF2K	Notch1	0	0	0.09797	0.08119	0	0.28625	0.10854	0	0	0.05551	0		1	0.0572236	Heterogeneous	Linker, 1 and 3		Signal Transduction
801	Fibronectin	YB.1	0.05134	0	0	0.25206	0.18852	0	0	0	0	0.13692	0		2	0.0571673	Heterogeneous	1		NA
802	NF.kB.p65_pS536	p90RSK_pT359_S363	0	0.18279	0	0	0.25906	0.05304	0	0	0	0	0.13011		1	0.0568182	Heterogeneous	2		Activated TLR4 signalling, Cellular Senescence, Cellular responses to stress, Developmental Biology, Immune System, Innate Immune System, MAP kinase activation in TLR cascade, MyD88 cascade initiated on plasma membrane, MyD88 dependent cascade initiated on endosome, MyD88:Mal cascade initiated on plasma membrane, Senescence-Associated Secretory Phenotype (SASP), Signal Transduction, Signalling by…
803	Bad_pS112	MEK1_pS217_S221	0	0.29118	0.18751	0	0.14551	0	0	0	0	0	0		1	0.0567455	Heterogeneous	2		DAP12 interactions, DAP12 signaling, Disease, Downstream signal transduction, Downstream signaling of activated FGFR1, Downstream signaling of activated FGFR2, Downstream signaling of activated FGFR3, Downstream signaling of activated FGFR4, Fc epsilon receptor (FCERI) signaling, Immune System, Innate Immune System, NGF signalling via TRKA from the plasma membrane, Signal Transduction, Signaling …
804	c.Myc	p27_pT157	0.16152	0	0	0.25267	0	0.12475	0.0845	0	0	0	0		1	0.0566764	Heterogeneous	1		Cell Cycle, Cell Cycle, Mitotic, Cyclin A:Cdk2-associated events at S phase entry, Disease, Diseases of signal transduction, G1/S Transition, Mitotic G1-G1/S phases, S Phase, Signal Transduction
805	c.Met_pY1235	Chk1_pS345	0.21837	0.2584	0	0	0.23039	-0.05482	-0.03702	0	0	0	0		1	0.0559382	Heterogeneous	1		NA
806	p90RSK_pT359_S363	Rb_pS807_S811	0.13596	0.1899	0.08655	0	0.10246	0	0.0842	-0.09652	0	0.11277	0		1	0.0559382	Heterogeneous	2		Cellular Senescence, Cellular responses to stress
807	Chk1_pS345	p27_pT157	0	0.21565	0.08263	0	0	0	0	0	0.19409	0.12253	0		1	0.0559	Heterogeneous	1		Cell Cycle, Cell Cycle Checkpoints, G1/S DNA Damage Checkpoints, Signal Transduction, Signaling by SCF-KIT
808	GSK3.alpha.beta	GSK3.alpha.beta_pS21_S9	0.15781	0.07726	-0.10053	0	0	0	0	0.27918	0.13588	0.06288	0		1	0.05568	Heterogeneous	Linker, 2 and 3		NA
809	HER3	XBP1	0.10595	0.54819	0	-0.08786	0	0	0	0	0	0.04609	0		1	0.05567	Heterogeneous	1		NA
810	HER3_pY1289	Shc_pY317	0	0	0	0	0.26653	0.27521	0.07005	0	0	0	0		1	0.0556173	Heterogeneous	Linker, 1 and 2		ARMS-mediated activation, Adaptive Immune System, Axon guidance, Cytokine Signaling in Immune system, DAP12 interactions, DAP12 signaling, Developmental Biology, Disease, Diseases of signal transduction, Downstream signal transduction, Downstream signaling of activated FGFR1, Downstream signaling of activated FGFR2, Downstream signaling of activated FGFR3, Downstream signaling of activated FGFR4,…
811	c.Jun_pS73	NF.kB.p65_pS536	0	0	0.18247	0	0.10287	0	0.20262	0.1225	0	0	0		1	0.0554964	Heterogeneous	2		Activated TLR4 signalling, Cellular Senescence, Cellular responses to stress, Fc epsilon receptor (FCERI) signaling, Immune System, Innate Immune System, MAP kinase activation in TLR cascade, MyD88 cascade initiated on plasma membrane, MyD88 dependent cascade initiated on endosome, MyD88:Mal cascade initiated on plasma membrane, Senescence-Associated Secretory Phenotype (SASP), Signal Transductio…
812	Bak	p27_pT198	0	0	0.19091	0.06308	0	0	0	0.26988	0	0.08349	0		1	0.0552145	Heterogeneous	1		NA
813	FOXO3a	PDK1	0	0.09505	0	0.0777	-0.17591	0	0	0	0.29501	0.31528	0		1	0.0551936	Heterogeneous	Linker, 3 and 4		Signal Transduction
814	c.Myc	ETS.1	0	0	0	0	0.28378	0	0.06409	0.25831	0	0	0		1	0.0551073	Heterogeneous	1		NA
815	Caveolin.1	FOXO3a_pS318_S321	0	0.36644	0	0	0	0.07712	0.24386	-0.08205	0	0	0		1	0.0550336	Heterogeneous	5		Signal Transduction
816	Bad_pS112	Chk1_pS345	0.06716	0	0.18478	0.17659	0	0	0	0	0	0	0.17468		1	0.0548373	Heterogeneous	Linker, 1 and 2		Signal Transduction, Signaling by SCF-KIT
817	CD20	Smad3	0	0	0.16415	0.43677	0	0	0	0	0	0	0		1	0.0546291	Heterogeneous	1		NA
818	mTOR	Syk	0	0.23444	0	0.06781	0	0.19678	0.10187	0	0	0	0		1	0.0546273	Heterogeneous	Linker, 3 and 6		Adaptive Immune System, DAP12 interactions, DAP12 signaling, Fc epsilon receptor (FCERI) signaling, Immune System, Innate Immune System, Role of LAT2/NTAL/LAB on calcium mobilization, Signal Transduction, Signaling by the B Cell Receptor (BCR)
819	Bad_pS112	MAPK_pT202_Y204	0.06351	0.33411	0.20146	0	0	0	0	0	0	0	0		1	0.0544618	Heterogeneous	2		DAP12 interactions, DAP12 signaling, Downstream signal transduction, Downstream signaling of activated FGFR1, Downstream signaling of activated FGFR2, Downstream signaling of activated FGFR3, Downstream signaling of activated FGFR4, Fc epsilon receptor (FCERI) signaling, Immune System, Innate Immune System, NGF signalling via TRKA from the plasma membrane, Signal Transduction, Signaling by EGFR, …
820	Bcl.xL	N.Cadherin	0.08693	0	0.26109	0	0	0.15247	0	0.09652	0	0	0		1	0.0542736	Heterogeneous	1		NA
821	14.3.3_beta	A.Raf_pS299	0	0	0	0	0	0	0.27402	0.26885	0	0	0.05285		1	0.0541564	Heterogeneous	4		ARMS-mediated activation, Axon guidance, Cytokine Signaling in Immune system, DAP12 interactions, DAP12 signaling, Developmental Biology, Downstream signal transduction, Downstream signaling of activated FGFR1, Downstream signaling of activated FGFR2, Downstream signaling of activated FGFR3, Downstream signaling of activated FGFR4, FCERI mediated MAPK activation, FRS-mediated FGFR1 signaling, FRS…
822	Rictor	VEGFR2	0	0.07561	0.16966	0.23125	0	0	0.11789	0	0	0	0		1	0.0540373	Heterogeneous	5		NA
823	AR	CD31	0	0	0	0	0	0.26255	0.28773	0	0	0.04309	0		1	0.0539427	Heterogeneous	Linker, 1 and 4		NA
824	ACVRL1	PR	0	0	0	0.27838	0	0.05785	0.21911	0.03514	0	0	0		1	0.05368	Heterogeneous	4		NA
825	ACVRL1	Heregulin	0.22172	0.23095	0.13621	0	0	0	0	0	0	0	0		1	0.0535345	Heterogeneous	4		NA
826	AR	Smad4	0	0.0427	0	0	0	0.29191	0.25349	0	0	0	0		1	0.0534636	Heterogeneous	Linker, 1 and 4		Gene Expression, Generic Transcription Pathway, Signal Transduction
827	GATA3	INPP4B	0.35246	0	0	0.23301	0	0	0	0	0	0	0		2	0.0532245	Heterogeneous	1		NA
828	p90RSK_pT359_S363	Shc_pY317	0.21618	0	0	0	0	0	0.23607	0.09318	0.0323	0	0		1	0.0525209	Heterogeneous	2		Axon guidance, Developmental Biology, Gastrin-CREB signalling pathway via PKC and MAPK, Immune System, Innate Immune System, NGF signalling via TRKA from the plasma membrane, Signal Transduction, Signaling by GPCR, Signalling by NGF
829	PCNA	Stathmin	0.08086	0.09109	0.23389	0.08651	0	0	0	0.02418	0.05725	0	0		1	0.0521618	Heterogeneous	Linker, 1 and 6		NA
830	Collagen_VI	PEA.15	0	0	0	0	0	0.27522	0.29498	0	0	0	0		2	0.0518364	Heterogeneous	5		Axon guidance, Developmental Biology, NCAM signaling for neurite out-growth, Signal Transduction, Signaling by PDGF
831	p21	YB.1	0	0.31164	0	0.19187	0	0	0	0.06661	0	0	0		1	0.0518291	Heterogeneous	1		NA
832	p90RSK	p90RSK_pT359_S363	0.12693	0	0.23182	0.08329	0	0.05343	0.06445	0	0	0	0		1	0.0509018	Heterogeneous	Linker, 2 and 3		NA
833	4E.BP1_pT70	Chk2_pT68	0	0.07541	0	0	0	0	0	0.2341	0.2455	0	0		1	0.0504555	Heterogeneous	Linker, 1 and 5		NA
834	ACVRL1	PEA15_pS116	0	0.1663	0	0	0	0	0	0	0.08116	0	0.30419		1	0.05015	Heterogeneous	Linker, 1 and 4		NA
835	AMPK_pT172	ERK2	0	0	0	0.05864	0	0	0.0625	0	0	0.11498	0.31495		1	0.0500973	Heterogeneous	3		Cellular responses to stress, IGF1R signaling cascade, IRS-mediated signalling, IRS-related events triggered by IGF1R, Insulin receptor signalling cascade, Signal Transduction, Signaling by Insulin receptor, Signaling by Type 1 Insulin-like Growth Factor 1 Receptor (IGF1R)
836	ARHI	P.Cadherin	0	0	0.26497	0.2821	0	0	0	0	0	0	0		2	0.0497336	Heterogeneous	4		NA
837	ER.alpha_pS118	Smad4	0	0.22998	0	0	0.21313	0	0	0	0.03617	0.06466	0		1	0.0494491	Heterogeneous	Linker, 1 and 4		Gene Expression, Generic Transcription Pathway, Signal Transduction
838	Cyclin_E2	S6	0.08666	0	0.18743	0.3273	0	0	0	0	0	0	-0.05756		1	0.0494391	Heterogeneous	Linker, 1 and 6		NA
839	Akt	Rad50	0	0	0	0	0	0	0	0	0.25533	0.28829	0		1	0.04942	Heterogeneous	3		NA
840	ETS.1	GATA3	0	0.08889	0.38916	0	0	0	0.06392	0	0	0	0		1	0.04927	Heterogeneous	1		NA
841	Annexin.1	G6PD	0	0	0	0	0	0.25142	0.26647	0.02066	0	0	0		1	0.0489591	Heterogeneous	5		NA
842	ACVRL1	PREX1	0	0	0	0	0	0	0	0	0.07093	0.2065	0.25823		1	0.0486964	Heterogeneous	Linker, 4 and 6		NA
843	4E.BP1_pS65	Rictor	0	-0.1416	0.0974	0.02175	0	0.25588	0.30049	0	0	0	0		2	0.0485382	Heterogeneous	5		Signal Transduction
844	ERK2	VHL	0	0	0	0	0	0	0	0	0	0.24405	0.28482		1	0.0480791	Heterogeneous	3		Cellular responses to stress, Immune System
845	Ku80	Rad50	0	0	0	0	0	0	0	0	0.25227	0.27658	0		1	0.0480773	Heterogeneous	3		DNA Double-Strand Break Repair, DNA Repair, Nonhomologous End-Joining (NHEJ)
846	4E.BP1_pT70	eIF4E	0.10698	0	0	0.10718	0	0	0.09897	0	0	0.14176	0.07318		1	0.0480064	Heterogeneous	5		Activation of the mRNA upon binding of the cap-binding complex and eIFs, and subsequent binding to 43S, Cap-dependent Translation Initiation, Eukaryotic Translation Initiation, Gene Expression, IGF1R signaling cascade, IRS-mediated signalling, IRS-related events triggered by IGF1R, Insulin receptor signalling cascade, Metabolism of proteins, PI3K Cascade, PKB-mediated events, Signal Transduction,…
847	MAPK_pT202_Y204	p90RSK_pT359_S363	0.06717	0.21197	0.24569	0	0	0	0	0	0	0	0		1	0.0477118	Heterogeneous	2		Activated TLR4 signalling, Activation of NMDA receptor upon glutamate binding and postsynaptic events, Axon guidance, CREB phosphorylation through the activation of Ras, Cellular Senescence, Cellular responses to stress, Developmental Biology, ERK/MAPK targets, Gastrin-CREB signalling pathway via PKC and MAPK, Immune System, Innate Immune System, L1CAM interactions, MAP kinase activation in TLR c…
848	AMPK_alpha	GAPDH	-0.07757	0	0	0	0.22004	0.10699	0.06974	0.20545	0	0	0		1	0.0476955	Heterogeneous	Linker, 3 and 6		NA
849	CD31	PREX1	0	0.09829	0	0.06452	0	0.14973	0.21032	0	0	0	0		1	0.0475327	Heterogeneous	Linker, 4 and 6		NA
850	Annexin.1	PEA.15	0.08154	0	0	0	0	0.18863	0.27807	0	0	0	-0.0267		1	0.0474127	Heterogeneous	5		Gastrin-CREB signalling pathway via PKC and MAPK, Signal Transduction, Signaling by GPCR
851	Fibronectin	PEA.15	0	0	0	0.18133	0	0.27503	0.22626	-0.20908	0	0	0.04616		2	0.0472455	Heterogeneous	Linker, 1 and 5		ARMS-mediated activation, Axon guidance, Cytokine Signaling in Immune system, DAP12 interactions, DAP12 signaling, Developmental Biology, Downstream signal transduction, Downstream signaling of activated FGFR1, Downstream signaling of activated FGFR2, Downstream signaling of activated FGFR3, Downstream signaling of activated FGFR4, FCERI mediated MAPK activation, FRS-mediated FGFR1 signaling, FRS…
852	Annexin_VII	G6PD	0	0.1541	0	0	0	0	0	0.19924	0.10873	0.05627	0		1	0.0471218	Heterogeneous	5		NA
853	Claudin.7	p90RSK	0	0	0.08306	0	0.10489	0.07565	0.1774	0	0	0.07661	0		1	0.0470555	Heterogeneous	Linker, 3 and 6		NA
854	14.3.3_beta	p27_pT157	0.07554	0	0	0.28863	0.24742	-0.09753	0	0	0	0	0		1	0.0467327	Heterogeneous	Linker, 1 and 4		Adaptive Immune System, Cell Cycle, Cell Cycle Checkpoints, DAP12 interactions, DAP12 signaling, Downstream signal transduction, Downstream signaling of activated FGFR1, Downstream signaling of activated FGFR2, Downstream signaling of activated FGFR3, Downstream signaling of activated FGFR4, Fc epsilon receptor (FCERI) signaling, Immune System, Innate Immune System, NGF signalling via TRKA from t…
855	p38_MAPK	PDK1	0.16656	0	0	0.02054	0	0	0	-0.0199	0	0.27679	0.06975		1	0.0467036	Heterogeneous	Linker, 3 and 6		Signal Transduction
856	53BP1	GATA3	0.26615	0	0	0.51363	0	0	0	-0.26678	0	0	0		2	0.0466364	Heterogeneous	Linker, 1 and 3		NA
857	CD20	ER.alpha	0	0	0	0	0	0.14936	0	0	0.14235	0	0.21779		1	0.0463182	Heterogeneous	1		NA
858	p70S6K_pT389	S6_pS235_S236	0.11692	0.16452	0	0.09057	0.08358	0	0	0	0	0.05284	0		1	0.0462209	Heterogeneous	2		IGF1R signaling cascade, IRS-mediated signalling, IRS-related events triggered by IGF1R, Insulin receptor signalling cascade, PI3K Cascade, PKB-mediated events, Signal Transduction, Signaling by Insulin receptor, Signaling by Type 1 Insulin-like Growth Factor 1 Receptor (IGF1R), mTOR signalling, mTORC1-mediated signalling
859	Annexin.1	YAP_pS127	0.19262	0	0	0	0.10162	0	0	0.2126	0	0	0		1	0.0460764	Heterogeneous	5		Signal Transduction
860	NF2	Smad3	0	0	0	0.24736	0.17002	0	0	0.07899	0	0	0		1	0.0451245	Heterogeneous	Linker, 1 and 3		Signal Transduction
861	Collagen_VI	Rictor	0	0	0	0	0.10698	0.19742	0.1917	0	0	0	0		1	0.0451	Heterogeneous	5		Signal Transduction, Signaling by PDGF
862	C.Raf_pS338	GATA3	0	0.10717	0	0	0	0.06617	0.07329	0	0	0	0.243		1	0.0445118	Heterogeneous	1		Hemostasis
863	FOXO3a_pS318_S321	mTOR_pS2448	0	0	0.2276	0.16931	0	0.07025	0	0.0202	0	0	0		1	0.0443055	Heterogeneous	Linker, 2 and 5		Adaptive Immune System, Constitutive Signaling by AKT1 E17K in Cancer, DAP12 interactions, DAP12 signaling, Disease, Diseases of signal transduction, Downstream signal transduction, Downstream signaling events of B Cell Receptor (BCR), Downstream signaling of activated FGFR1, Downstream signaling of activated FGFR2, Downstream signaling of activated FGFR3, Downstream signaling of activated FGFR4,…
864	GSK3.alpha.beta	GSK3_pS9	0.07287	0	-0.16131	-0.07616	0.15452	0	0	0.27946	0	0.05925	0.1583		1	0.0442664	Heterogeneous	Linker, 2 and 3		NA
865	HER3_pY1289	Src_pY416	0	0.08483	0	0	0.20174	0.19773	0	0	0	0	0		1	0.0440273	Heterogeneous	Linker, 1 and 2		ARMS-mediated activation, Adaptive Immune System, Axon guidance, Cytokine Signaling in Immune system, DAP12 interactions, DAP12 signaling, Developmental Biology, Downstream signal transduction, Downstream signaling of activated FGFR1, Downstream signaling of activated FGFR2, Downstream signaling of activated FGFR3, Downstream signaling of activated FGFR4, FCERI mediated MAPK activation, FRS-media…
866	FoxM1	p62.LCK.ligand	0	0	0.19654	0	0	0	0.20739	0	0	0.03907	0.0394		1	0.0438545	Heterogeneous	Linker, 3 and 6		NA
867	PR	SF2	0	0	0.05569	0	-0.08356	0.27845	0.21453	0	0.01581	0	0		1	0.04372	Heterogeneous	4		NA
868	p21	Rad51	0.08151	0	0.05608	0	0.28249	0	0.05969	0	0	0	0		1	0.0436155	Heterogeneous	1		Cell Cycle
869	Chk1	p38_MAPK	0	0.08351	0.09761	0	0	0	0.26912	0	0	0.02862	0		1	0.0435327	Heterogeneous	Linker, 3 and 6		Signal Transduction
870	Chk2_pT68	Cyclin_D1	0	0.10185	0	0	0	0.069	0	0.30596	0	0	0		1	0.0433464	Heterogeneous	1		Cell Cycle
871	ARHI	EGFR_pY1173	0	0	0	0	0.09994	0	0	0	0.20984	0.16655	0		1	0.0433027	Heterogeneous	Linker, 1 and 4		NA
872	EGFR_pY1173	Src_pY416	0	0	0	0.08887	0.07098	0.05428	0	0.25154	0	0	0		1	0.0423336	Heterogeneous	Linker, 1 and 2		ARMS-mediated activation, Adaptive Immune System, Axon guidance, Cytokine Signaling in Immune system, DAP12 interactions, DAP12 signaling, Developmental Biology, Downstream signal transduction, Downstream signaling of activated FGFR1, Downstream signaling of activated FGFR2, Downstream signaling of activated FGFR3, Downstream signaling of activated FGFR4, FCERI mediated MAPK activation, FRS-media…
873	ARID1A	Smad1	0.09173	0	0	0	0.18751	0	0.1862	0	0	0	0		2	0.0423127	Heterogeneous	1		NA
874	4E.BP1_pT70	HSP70	0	0	0	0	0	0.08415	0.09317	0.2861	0	0	0		1	0.0421291	Heterogeneous	Linker, 1 and 5		Gene Expression
875	c.Jun_pS73	mTOR_pS2448	0	0.21868	0	0	0	0	0	0	0.03007	0.21449	0		1	0.0421127	Heterogeneous	2		Cellular responses to stress, Fc epsilon receptor (FCERI) signaling, Immune System, Innate Immune System, Signal Transduction
876	mTOR	PREX1	0.21861	0	0	0	0	0	0	0.24058	0	0	0		1	0.0417445	Heterogeneous	Linker, 3 and 6		NA
877	Caveolin.1	Rab11	0.27741	0	0.18137	0	0	0	0	0	0	0	0		1	0.0417073	Heterogeneous	Linker, 1 and 5		NA
878	Fibronectin	Myosin.IIa_pS1943	0.13725	0.17946	0	0	0	0.06235	0	0	0	0	0.07967		1	0.0417027	Heterogeneous	Linker, 1 and 5		Axon guidance, Developmental Biology, Immune System, Innate Immune System, Signal Transduction
879	ER.alpha	GATA3	0.47732	0	0	0	0	0	0	0	-0.04497	0	0.02592		1	0.0416609	Heterogeneous	1		NA
880	Rad51	Smad3	0	0	0	0.06987	0	0	0	0	0.21512	0.17066	0		1	0.0414227	Heterogeneous	1		NA
881	c.Myc	HER3	0.1539	0.2108	0	0	0	0	0	0.08837	0	0	0		1	0.0411882	Heterogeneous	1		Disease, Diseases of signal transduction, MAPK family signaling cascades, Signal Transduction
882	IGFBP2	PAI.1	0	0	0.12301	0	0	0	0	0.26866	0	0.05646	0		1	0.0407391	Heterogeneous	5		NA
883	ETS.1	Fibronectin	0	0.20733	0	0	0.19878	0	0	0	0.03839	0	0		1	0.0404091	Heterogeneous	1		NA
884	Beclin	PKC.delta_pS664	0.19526	0	0	0.06501	0	0.06209	0.05963	0	0	0.05977	0		1	0.04016	Heterogeneous	Linker, 1 and 2		NA
885	Bax	eIF4E	0	0	0	0	0	0.21894	0.19679	0.02537	0	0	0		2	0.0401	Heterogeneous	5		NA
886	Chk2	PCNA	0.06728	0	0	0	0	0.05302	0	0.22382	0.0879	0	0		1	0.0392745	Heterogeneous	6		Cell Cycle, DNA Double-Strand Break Repair, DNA Repair
887	4E.BP1_pS65	Caveolin.1	0	0	0.10792	0	0	0.2513	0.20865	-0.11715	-0.02032	0	0		1	0.0391273	Heterogeneous	5		Signal Transduction
888	Cyclin_E2	EGFR_pY1173	0	0	0.36313	0	0	0	0	0	0.06353	0	0		1	0.0387873	Heterogeneous	1		NA
889	Chk2_pT68	Rab11	0	0	0	0	0	0	0	0.42659	0	0	0		1	0.0387809	Heterogeneous	1		NA
890	Caspase.7_cleavedD198	PREX1	0	0	0	0.10705	0	0.11176	0.19239	-0.2369	0.10668	0.07239	0.06852		1	0.0383536	Heterogeneous	6		NA
891	4E.BP1	FoxM1	0	0.04108	0	0	0	0	0	0.16057	0.22004	0	0		1	0.0383355	Heterogeneous	Linker, 5 and 6		NA
892	C.Raf_pS338	Chk1_pS345	0.08992	0.23134	0	0	0.09596	0	0	0	0	0	0		1	0.0379291	Heterogeneous	1		Signal Transduction, Signaling by SCF-KIT
893	Collagen_VI	Mre11	0	0	0	0.41512	0	0	0	0	0	0	0		1	0.0377382	Heterogeneous	Linker, 1 and 5		NA
894	Caveolin.1	Src_pY527	0.17957	0.08496	0.08966	0	0	0	0	0	0.03056	0	0.03024		1	0.0377264	Heterogeneous	Linker, 2 and 5		Cell surface interactions at the vascular wall, Hemostasis, Signal Transduction, Signaling by VEGF, VEGFA-VEGFR2 Pathway
895	TAZ	YAP	0.21228	0	0	0	0	0	0	0	0	0	0.20169		1	0.0376336	Heterogeneous	Linker, 1 and 6		Fatty acid, triacylglycerol, and ketone body metabolism, Gene Expression, Generic Transcription Pathway, Metabolism, Metabolism of lipids and lipoproteins, PPARA activates gene expression, Regulation of lipid metabolism by Peroxisome proliferator-activated receptor alpha (PPARalpha), Signal Transduction, Signaling by Hippo, YAP1- and WWTR1 (TAZ)-stimulated gene expression
896	Bcl.xL	GATA3	0	0	0.34875	0	0	0	0	0	0.05893	0	0		1	0.0370618	Heterogeneous	1		NA
897	PREX1	STAT5.alpha	0	0.14451	0.12388	0	0.20445	0	-0.06838	0	0	0	0		1	0.0367691	Heterogeneous	Linker, 3 and 6		NA
898	AR	GATA3	0.22397	0	0	0.08483	0	0	0	-0.02513	0	0	0.12066		1	0.0367573	Heterogeneous	1		NA
899	4E.BP1	Bim	0	0	0	0	0	0.2233	0.07603	0.02205	0.07963	0	0		1	0.0364555	Heterogeneous	5		Signal Transduction
900	TRFC	Tuberin	0.1817	0.2178	0	0	0	0	0	0	0	0	0		1	0.0363182	Heterogeneous	Linker, 3 and 6		NA
901	JNK2	PKC.alpha	0	0	0.09831	0.18152	0	0	0	0.11876	0	0	0		1	0.0362355	Heterogeneous	Linker, 2 and 3		Immune System, Innate Immune System
902	Caspase.7_cleavedD198	Claudin.7	0	0	0	0	0	0.15024	0	0.29241	0	-0.04465	0		2	0.0361818	Heterogeneous	6		NA
903	Rab.25	SF2	0	0	0	0	0.10792	0	0	0.25479	0	0.03442	0		1	0.0361027	Heterogeneous	4		NA
904	A.Raf_pS299	MEK1_pS217_S221	0	0.19033	0	0	0.2062	0	0	0	0	0	0		1	0.0360482	Heterogeneous	Linker, 2 and 4		ARMS-mediated activation, Axon guidance, Cytokine Signaling in Immune system, DAP12 interactions, DAP12 signaling, Developmental Biology, Downstream signal transduction, Downstream signaling of activated FGFR1, Downstream signaling of activated FGFR2, Downstream signaling of activated FGFR3, Downstream signaling of activated FGFR4, FCERI mediated MAPK activation, FRS-mediated FGFR1 signaling, FRS…
905	ERK2	YB.1	0	0	0	0.08079	0	0.29078	0.02345	0	0	0	0		1	0.0359109	Heterogeneous	Linker, 1 and 3		NA
906	Bak	Fibronectin	0	0	0	-0.13632	0	0.21588	0.06805	0	0.06663	0.07226	0.10626		1	0.0357055	Heterogeneous	1		NA
907	MEK1	PEA15_pS116	0	0	0	0	0	0.2787	0.11283	0	0	0	0		1	0.0355936	Heterogeneous	Linker, 1 and 2		ARMS-mediated activation, Axon guidance, Cytokine Signaling in Immune system, DAP12 interactions, DAP12 signaling, Developmental Biology, Downstream signal transduction, Downstream signaling of activated FGFR1, Downstream signaling of activated FGFR2, Downstream signaling of activated FGFR3, Downstream signaling of activated FGFR4, FCERI mediated MAPK activation, FRS-mediated FGFR1 signaling, FRS…
908	FOXO3a_pS318_S321	VEGFR2	-0.08365	0.18483	0	0	0.10345	0.13467	0.04993	0	0	0	0		1	0.0353845	Heterogeneous	5		NA
909	Cyclin_E2	RBM15	0	0.10723	0.22862	0.30136	-0.24838	0	0	0	0	0	0		2	0.0353482	Heterogeneous	Linker, 1 and 3		NA
910	4E.BP1_pS65	ACVRL1	0	0	0.07079	0.07965	0	0.09862	0.13831	0	0	0	0		1	0.0352155	Heterogeneous	Linker, 4 and 5		NA
911	4E.BP1_pT70	Mre11	0	0	0	0	0	0	0	0.21243	0.17435	0	0		1	0.0351618	Heterogeneous	Linker, 1 and 5		NA
912	Cyclin_E1	GSK3.alpha.beta	0	0	0	0.17842	0	0	0	0	0.06289	0.06037	0.08104		1	0.0347927	Heterogeneous	Linker, 3 and 6		Cellular responses to stress
913	Cyclin_E2	Smad4	0	0	0	0	0.10989	0	0	0	0	0.05664	0.21574		1	0.0347518	Heterogeneous	Linker, 1 and 4		NA
914	p38_MAPK	PI3K.p85	0.17092	0	0.0189	0	0	0	0.09905	0.06504	0.02726	0	0		1	0.0346518	Heterogeneous	6		Cell-Cell communication, Hemostasis, Immune System, Innate Immune System, NGF signalling via TRKA from the plasma membrane, Platelet activation, signaling and aggregation, Signal Transduction, Signaling by VEGF, Signalling by NGF, VEGFA-VEGFR2 Pathway
915	Akt	PI3K.p110.alpha	0.09352	0	0.09839	0.18453	0	0	0	0	0	0	0		1	0.0342218	Heterogeneous	Linker, 1 and 3		Adaptive Immune System, CD28 co-stimulation, CD28 dependent PI3K/Akt signaling, Costimulation by the CD28 family, DAP12 interactions, DAP12 signaling, Disease, Diseases of signal transduction, Downstream signal transduction, Downstream signaling events of B Cell Receptor (BCR), Downstream signaling of activated FGFR1, Downstream signaling of activated FGFR2, Downstream signaling of activated FGFR…
916	ARHI	TAZ	0	0	0	0	0	0	0	0	0	0	0.37505		1	0.0340955	Heterogeneous	Linker, 1 and 4		NA
917	ACVRL1	PKC.delta_pS664	0	0	0.08476	0	0	0	0	0	0	0	0.2837		1	0.0334964	Heterogeneous	Linker, 2 and 4		NA
918	IRS1	N.Cadherin	0.02408	0	0	0	0	0	0	0	0	0.27563	0.0667		1	0.03331	Heterogeneous	1		Developmental Biology
919	Caveolin.1	PAI.1	0	0	0	0	0	0	0	0.27635	0	0	0.08385		1	0.0327455	Heterogeneous	5		Hemostasis, Signal Transduction
920	P.Cadherin	PAI.1	0	0	0.11431	0	0.10557	0	0	0.19976	0	0	-0.0628		1	0.03244	Heterogeneous	Linker, 4 and 5		NA
921	EGFR	ETS.1	0.19948	0.15368	0	0	0	0	0	0	0	0	0		1	0.0321055	Heterogeneous	1		NA
922	Dvl3	IRS1	0	0	0	0.124	0	0	0.22172	0	0	0	0		1	0.0314291	Heterogeneous	Linker, 1 and 3		Signal Transduction
923	AMPK_pT172	E.Cadherin	0	0	0	0	0.01613	0	0.21537	-0.04071	0	0	0.15476		1	0.0314136	Heterogeneous	3		Signal Transduction
924	Bid	BRCA2	0	0	0	0	0.21826	0	0	0	0	0.12034	0		1	0.0307818	Heterogeneous	1		NA
925	GATA3	PEA15_pS116	0	0	0.40587	0	0	0	0	0	0	0	-0.06741		1	0.0307691	Heterogeneous	1		NA
926	GATA3	VEGFR2	0.27412	0	0	0	0	0	0	0	0.06155	0	0		1	0.0305155	Heterogeneous	Linker, 1 and 5		NA
927	14.3.3_beta	Rab.25	0	0	0	0	0	0	0	0.33371	0	0	0		1	0.0303373	Heterogeneous	4		NA
928	C.Raf	LKB1	0	0	0	0	0	0	0	-0.09456	0.24368	0.18064	0		1	0.0299782	Heterogeneous	Linker, 1 and 5		IGF1R signaling cascade, IRS-mediated signalling, IRS-related events triggered by IGF1R, Insulin receptor signalling cascade, Signal Transduction, Signaling by Insulin receptor, Signaling by Type 1 Insulin-like Growth Factor 1 Receptor (IGF1R)
929	Bcl.xL	Rad50	0	0.13433	0.19377	0	0	0	0	0	0	0	0		1	0.0298273	Heterogeneous	Linker, 1 and 3		NA
930	ER.alpha	INPP4B	0.24813	0	0	0	0	0	0	0.07827	0	0	0		1	0.0296727	Heterogeneous	1		NA
931	Beclin	Collagen_VI	-0.11237	0	0.20834	0.22503	0	0	0	0	0	0	0		2	0.0291818	Heterogeneous	Linker, 1 and 5		NA
932	CD31	DJ.1	0.09634	0	0	0	0	0	0	0	0	0	0.22414		1	0.0291345	Heterogeneous	Linker, 4 and 5		NA
933	ER.alpha	PREX1	0.24222	0	-0.06848	0	0	0.06131	0.07857	0	0	0	0		1	0.0285109	Heterogeneous	Linker, 1 and 6		NA
934	CDK1	p21	0	0	0.17463	0	0	0	0.07243	0	0	0.06317	0		1	0.0282027	Heterogeneous	Linker, 1 and 6		Cell Cycle, Cell Cycle Checkpoints, Cell Cycle, Mitotic, G1/S Transition, Mitotic G1-G1/S phases, Signal Transduction
935	AMPK_pT172	PREX1	0	0	0	0	0.08797	0	0	0.21656	0	0	0		1	0.0276845	Heterogeneous	Linker, 3 and 6		NA
936	IGFBP2	NDRG1_pT346	0	0	0	0	0	0	0	0.09483	0	0.2077	0		1	0.0275027	Heterogeneous	Linker, 2 and 5		NA
937	p38_MAPK	Syk	0	0	0	0.02082	0	0	0	0.22435	0	0.05604	0		1	0.0273827	Heterogeneous	6		Hemostasis, Immune System, Innate Immune System, Platelet activation, signaling and aggregation, Signal Transduction
938	CD31	P.Cadherin	0.09168	0	0.29167	0.27988	-0.36432	0	0	0	0	0	0		1	0.0271736	Heterogeneous	4		NA
939	ARHI	FOXO3a_pS318_S321	0.09973	0	0	0.19826	0	0	0	0	0	0	0		1	0.02709	Heterogeneous	Linker, 4 and 5		NA
940	PI3K.p110.alpha	PTEN	0	0.06775	0	0	0	0	0	0.22951	0	0	0		1	0.0270236	Heterogeneous	Linker, 1 and 6		Adaptive Immune System, DAP12 interactions, DAP12 signaling, Downstream TCR signaling, Downstream signal transduction, Downstream signaling events of B Cell Receptor (BCR), Downstream signaling of activated FGFR1, Downstream signaling of activated FGFR2, Downstream signaling of activated FGFR3, Downstream signaling of activated FGFR4, Fc epsilon receptor (FCERI) signaling, GAB1 signalosome, Immun…
941	LKB1	Rad51	0	0	0	-0.09562	0.11121	0	0	0	0	0.07402	0.2037		1	0.0266645	Heterogeneous	1		NA
942	MYH11	VEGFR2	0	0.07766	0.2149	0	0	0	0	0	0	0	0		1	0.0265964	Heterogeneous	5		NA
943	14.3.3_epsilon	ETS.1	0	0	0	0	0	0	0	0.07926	0	0	0.21258		1	0.0265309	Heterogeneous	Linker, 1 and 4		Cellular responses to stress
944	MEK1	Rab11	0	0	0	0	0	0.29022	0	0	0	0	0		1	0.0263836	Heterogeneous	Linker, 1 and 2		NA
945	FOXO3a	Rab11	0	0	0	0	0	0	0	0	0.06631	0	0.22125		1	0.0261418	Heterogeneous	Linker, 1 and 4		NA
946	HER3_pY1289	IRS1	0	0.05813	0	0	0	-0.06321	0	0	0	0.23314	0.05594		1	0.0258182	Heterogeneous	1		ARMS-mediated activation, Adaptive Immune System, Axon guidance, Constitutive Signaling by Aberrant PI3K in Cancer, Cytokine Signaling in Immune system, DAP12 interactions, DAP12 signaling, Developmental Biology, Disease, Diseases of signal transduction, Downstream signal transduction, Downstream signaling events of B Cell Receptor (BCR), Downstream signaling of activated FGFR1, Downstream signal…
947	Annexin.1	Annexin_VII	0	0	0	0	0.09695	0	0.18654	0	0	0	0		1	0.0257718	Heterogeneous	5		NA
948	eEF2	GATA3	0	0	0.31388	0	0	-0.03563	0	0	0	0	0		1	0.0252955	Heterogeneous	Linker, 1 and 6		NA
949	Annexin.1	PKC.alpha_pS657	0.27797	0	0	0	0	0	0	0	0	0	0		1	0.02527	Heterogeneous	Linker, 2 and 5		GPCR downstream signaling, Gastrin-CREB signalling pathway via PKC and MAPK, Signal Transduction, Signaling by GPCR
950	GSK3.alpha.beta	Syk	0	0.15286	0	0.06467	0	0	0	0	0	0	0.05792		1	0.0250409	Heterogeneous	Linker, 3 and 6		Adaptive Immune System, DAP12 interactions, DAP12 signaling, Fc epsilon receptor (FCERI) signaling, Immune System, Innate Immune System, Role of LAT2/NTAL/LAB on calcium mobilization, Signal Transduction, Signaling by the B Cell Receptor (BCR)
951	eEF2	Rad51	0.09313	0	0	0.17857	0	0	0	0	0	0	0		1	0.0247	Heterogeneous	Linker, 1 and 6		NA
952	ETS.1	MEK1	0	0	0	-0.06423	0	0.30535	0.02836	0	0	0	0		1	0.0244982	Heterogeneous	Linker, 1 and 2		NA
953	MYH11	Rad50	0	0	0	0	0	0	0	-0.07412	0	0	0.34197		1	0.02435	Heterogeneous	Linker, 3 and 5		NA
954	B.Raf	MEK1	0	0	0	0	0	0	0	0.26702	0	0	0		1	0.0242745	Heterogeneous	Linker, 2 and 3		ARMS-mediated activation, Axon guidance, Cytokine Signaling in Immune system, DAP12 interactions, DAP12 signaling, Developmental Biology, Downstream signal transduction, Downstream signaling of activated FGFR1, Downstream signaling of activated FGFR2, Downstream signaling of activated FGFR3, Downstream signaling of activated FGFR4, FCERI mediated MAPK activation, FRS-mediated FGFR1 signaling, FRS…
955	Annexin.1	Lck	0.19225	0	0	0	0	0	0	0.06953	0	0	0		1	0.0237982	Heterogeneous	Linker, 5 and 6		Signal Transduction
956	GATA3	Src	0	0	0	0.25824	0	0	0	0	0	0	0		1	0.0234764	Heterogeneous	1		Hemostasis
957	ACC_pS79	p70S6K	0	0	0	0.2536	0	0	0	0	0	0	0		1	0.0230545	Heterogeneous	Linker, 3 and 6		NA
958	Annexin.1	PREX1	-0.18748	0	0.11401	0.08095	0	0.06338	0.17771	0	0	0	0		1	0.0225973	Heterogeneous	Linker, 5 and 6		NA
959	Cyclin_E1	YAP	0	0	0	0	0.24489	0	0	0	0	0	0		1	0.0222627	Heterogeneous	6		NA
960	HER3_pY1289	SCD1	0	0	0	0	0	0.2429	0	0	0	0	0		1	0.0220818	Heterogeneous	Linker, 1 and 4		NA
961	MIG.6	p27_pT157	0	0	0.19413	0.04611	0	0	0	0	0	0	0		1	0.02184	Heterogeneous	1		NA
962	Chk1_pS345	Cyclin_E1	0	0	0	0	0.2392	0	0	0	0	0	0		1	0.0217455	Heterogeneous	Linker, 1 and 6		Cell Cycle, Cell Cycle Checkpoints, G1/S DNA Damage Checkpoints
963	Beclin	LKB1	0	0.17632	0	0.06013	0	0	0	0	0	0	0		1	0.0214955	Heterogeneous	1		NA
964	Chk2_pT68	SCD1	0.17231	0.06193	0	0	0	0	0	0	0	0	0		1	0.0212945	Heterogeneous	Linker, 1 and 4		NA
965	EGFR_pY1173	TAZ	0.2339	0	0	0	0	0	0	0	0	0	0		1	0.0212636	Heterogeneous	1		Signal Transduction
966	HER3	INPP4B	0	0.23275	0	0	0	0	0	0	0	0	0		1	0.0211591	Heterogeneous	1		NA
967	14.3.3_beta	XRCC1	0	0	0	0	0.20481	0.02224	0	0	0	0	0		1	0.0206409	Heterogeneous	4		NA
968	GATA3	N.Cadherin	0	0	0.28349	0	0	-0.05775	0	0	0	0	0		1	0.0205218	Heterogeneous	1		NA
969	14.3.3_epsilon	Cyclin_E1	0	0	0	0	0.225	0	0	0	0	0	0		1	0.0204545	Heterogeneous	Linker, 4 and 6		Cell Cycle, Cell Cycle Checkpoints, Cell Cycle, Mitotic, Cellular responses to stress
970	Cyclin_E2	PEA15_pS116	0	0.16878	0	0	0	-0.13617	0	0	0.08733	0.10457	0		1	0.02041	Heterogeneous	1		NA
971	BRCA2	Rab.25	0	0	0	0	0.21962	0	0	0	0	0	0		1	0.0199655	Heterogeneous	Linker, 1 and 4		NA
972	Bak	Claudin.7	0	0	0	0	0	0	0	0.25312	0	-0.03421	0		1	0.0199009	Heterogeneous	Linker, 1 and 6		NA
973	MEK1	p70S6K_pT389	0	0	0	0	0	0	0	0.21861	0	0	0		1	0.0198736	Heterogeneous	2		IGF1R signaling cascade, IRS-mediated signalling, IRS-related events triggered by IGF1R, Insulin receptor signalling cascade, Signal Transduction, Signaling by Insulin receptor, Signaling by Type 1 Insulin-like Growth Factor 1 Receptor (IGF1R)
974	14.3.3_beta	LKB1	0	0	0	0	0	0	0	0	0	0	0.21679		1	0.0197082	Heterogeneous	Linker, 1 and 4		IGF1R signaling cascade, IRS-mediated signalling, IRS-related events triggered by IGF1R, Insulin receptor signalling cascade, PI3K Cascade, PKB-mediated events, Signal Transduction, Signaling by Insulin receptor, Signaling by Type 1 Insulin-like Growth Factor 1 Receptor (IGF1R), mTOR signalling
975	GAB2	GSK3.alpha.beta	0	0	0	0	0	0	0	0.21002	0	0	0		1	0.0190927	Heterogeneous	3		Disease, Diseases of signal transduction, Fc epsilon receptor (FCERI) signaling, Immune System, Innate Immune System, Role of LAT2/NTAL/LAB on calcium mobilization, Signal Transduction, Signaling by SCF-KIT
976	GAPDH	Lck	-0.11152	0	0.15569	0	0	0.19942	0	0	0	0	-0.03808		1	0.0186827	Heterogeneous	6		NA
977	Cyclin_E2	TRFC	0	0	0	0.20271	0	0	0	0	0	0	0		1	0.0184282	Heterogeneous	Linker, 1 and 6		NA
978	SF2	XRCC1	0	0	0	0	0	0	0.17597	0	0.0253	0	0		1	0.0182973	Heterogeneous	4		NA
979	JNK_pT183_Y185	PKC.pan_BetaII_pS660	0	0	0	0	0	0	0	0.19987	0	0	0		1	0.01817	Heterogeneous	2		Immune System, Signal Transduction
980	Chk1_pS345	SCD1	0.13944	0	0	0	0	0	0	0	0.05255	0	0		1	0.0174536	Heterogeneous	Linker, 1 and 4		NA
981	HER2	Src	0	0	0	0.24543	0	-0.02883	-0.02538	0	0	0	0		1	0.0173836	Heterogeneous	1		ARMS-mediated activation, Adaptive Immune System, Axon guidance, Cytokine Signaling in Immune system, DAP12 interactions, DAP12 signaling, Developmental Biology, Downstream signal transduction, Downstream signaling of activated FGFR1, Downstream signaling of activated FGFR2, Downstream signaling of activated FGFR3, Downstream signaling of activated FGFR4, FCERI mediated MAPK activation, FRS-media…
982	HER3	PKC.alpha	-0.10565	0.2025	0	0	0	0	0	0	0	0	0.0941		1	0.0173591	Heterogeneous	Linker, 1 and 2		DAP12 interactions, DAP12 signaling, Downstream signal transduction, Downstream signaling of activated FGFR1, Downstream signaling of activated FGFR2, Downstream signaling of activated FGFR3, Downstream signaling of activated FGFR4, Gastrin-CREB signalling pathway via PKC and MAPK, Immune System, Innate Immune System, NGF signalling via TRKA from the plasma membrane, Signal Transduction, Signalin…
983	CD31	Notch1	0	0	0	0	0.18506	0	0	0	0	0	0		1	0.0168236	Heterogeneous	Linker, 1 and 4		NA
984	AR	c.Myc	0	0.18026	0	0	0	0	0	0	0	0	0		1	0.0163873	Heterogeneous	1		Gene Expression, Generic Transcription Pathway, Signal Transduction
985	Heregulin	Rad50	0	0	0	0	0	0	0	0	0	0	0.17824		1	0.0162036	Heterogeneous	Linker, 3 and 4		NA
986	MIG.6	p21	0	0.15006	0	0	0	0	0	0.02056	0	0	0		1	0.0155109	Heterogeneous	1		NA
987	GATA3	PREX1	0.31791	0	-0.11282	0	0	0	0.14417	-0.18734	0	0	0		1	0.01472	Heterogeneous	Linker, 1 and 6		NA
988	INPP4B	Src	0	0	0	0.23881	0	0	-0.07753	0	0	0	0		1	0.0146618	Heterogeneous	1		NA
989	EGFR	N.Cadherin	0.27571	0	0	-0.02881	-0.09517	0	0	0	0	0	0		1	0.0137936	Heterogeneous	1		Developmental Biology
990	ER.alpha_pS118	PRAS40_pT246	0	0	0.18694	0.21231	-0.12579	-0.05864	-0.06866	0	0	0	0		1	0.0132873	Heterogeneous	Linker, 1 and 2		Signal Transduction, Signaling by ERBB4
991	AR	Bid	-0.12602	0	0	0	0	0	0	0	0	0	0.26847		1	0.01295	Heterogeneous	1		NA
992	GATA3	Smad1	0.02152	0	0	0	0	0	0	-0.16142	0	0	0.2782		1	0.0125727	Heterogeneous	1		NA
993	Caveolin.1	G6PD	0	0	0	0	0	0.17246	0	0	0	0	-0.03985		1	0.0120555	Heterogeneous	5		Metabolism
994	HER3	YB.1	0	0.26244	0	0	-0.14343	0	0	0	0	0	0		1	0.0108191	Heterogeneous	1		NA
995	JNK_pT183_Y185	MEK1	0	-0.04628	0	0	-0.10481	0	0	0.25907	0	0	0		1	0.00981636	Heterogeneous	2		Activated TLR4 signalling, FCERI mediated MAPK activation, Fc epsilon receptor (FCERI) signaling, Immune System, Innate Immune System, MAP kinase activation in TLR cascade, MyD88 cascade initiated on plasma membrane, MyD88 dependent cascade initiated on endosome, MyD88:Mal cascade initiated on plasma membrane, Signal Transduction, Signalling by NGF, TRAF6 mediated induction of NFkB and MAP kinase…
996	Claudin.7	YAP	0	0	0	0	0	-0.05793	-0.08392	0.21763	0	0	0		1	0.00688909	Heterogeneous	6		NA
997	AR	INPP4B	0.23143	0	0	0	-0.10489	0	0	0	0	-0.06099	0		1	0.00595909	Heterogeneous	1		NA
998	p27_pT157	XBP1	0	0.09423	0	0	0	-0.06269	0	0.20351	-0.1905	0	0		1	0.00405	Heterogeneous	1		NA
999	Cyclin_E2	GAPDH	0	0	0	0.1974	0	0	0	-0.15483	0	0	0		1	0.00387	Heterogeneous	Linker, 1 and 6		NA
1000	Bak	RBM15	0	-0.1459	0.30917	0.49803	-0.25586	-0.11267	0	-0.25592	0	0	0		1	0.00335	Heterogeneous	Linker, 1 and 3		NA
1001	GATA3	RBM15	0.12121	-0.11246	0	0.44949	-0.19094	0	0	-0.23896	0	0	0		1	0.00257636	Heterogeneous	Linker, 1 and 3		NA
1002	Cyclin_E2	PDK1	0	0.16062	0	0	-0.14964	0	0	0	0	0	0		1	0.000998182	Heterogeneous	Linker, 1 and 3		NA
1003	p62.LCK.ligand	TSC1	0	0.1712	0	0	-0.14652	0	0	0	-0.02792	0	0		1	-0.000294545	Heterogeneous	3		Signal Transduction
1004	Collagen_VI	HER3	0	0.16087	0	0	-0.1044	-0.14352	0	0	0	0	0		1	-0.00791364	Heterogeneous	Linker, 1 and 5		Axon guidance, Developmental Biology, NCAM signaling for neurite out-growth, Signal Transduction, Signaling by PDGF
1005	Collagen_VI	Dvl3	-0.19677	0	0	0	0	0	0	0	0	0	0		1	-0.0178882	Heterogeneous	Linker, 3 and 5		Signal Transduction
1006	MIG.6	p70S6K	0	0	0	0	0	0	0	-0.4497	0.14839	0	0		1	-0.0273918	Heterogeneous	Linker, 1 and 3		NA
1007	EGFR_pY1173	GSK3.alpha.beta	-0.27474	0	0	0	0	-0.08817	0	0	0	0	0		1	-0.0329918	Heterogeneous	Linker, 1 and 3		Adaptive Immune System, Axon guidance, DAP12 interactions, DAP12 signaling, Developmental Biology, Disease, Diseases of signal transduction, Downstream signal transduction, Downstream signaling events of B Cell Receptor (BCR), Downstream signaling of activated FGFR1, Downstream signaling of activated FGFR2, Downstream signaling of activated FGFR3, Downstream signaling of activated FGFR4, Fc epsil…
1008	EGFR	GATA3	-0.34143	0	0	0	0	0	0	0	-0.06179	0	0		1	-0.0366564	Heterogeneous	1		NA

## Sheet: B)Binary for passing cutoff 425
EDGE NUMBER	ANTIBODY 1	ANTIBODY 2	BRCA	OV	UCEC	BLCA	KIRC	READ	COAD	GBM	LUAD	LUSC	HNSC
1	S6_pS235_S236	S6_pS240_S244	1	1	1	1	1	1	1	1	1	1	1		Note: An edge can have high weight but binary value 0
2	PKC.alpha	PKC.alpha_pS657	1	1	1	1	1	1	1	1	1	1	0		This happens when only one method declares a non-NA coefficient for this edge in the limited recall set
3	GSK3.alpha.beta_pS21_S9	GSK3_pS9	1	1	1	1	1	1	1	1	1	1	1		Then the single non-NA weight is the consensus weight, but the consensus rank is computed as an average over individual ranks where
4	ACC_pS79	ACC1	1	1	1	1	1	1	1	1	1	1	1		each individual rank is [1+number of edges inferred by method] as explained in S1E Text Step 6.
5	Akt_pS473	Akt_pT308	1	1	1	1	1	1	1	1	1	1	0
6	MAPK_pT202_Y204	MEK1_pS217_S221	1	1	1	1	0	1	1	1	1	1	1
7	Cyclin_B1	FoxM1	1	1	1	1	0	1	1	1	1	1	1
8	EGFR_pY1068	HER2_pY1248	1	1	1	1	1	0	1	1	1	1	1
9	MYH11	Rictor	1	1	1	1	1	1	1	0	1	1	0
10	14.3.3_beta	ARHI	1	1	0	0	0	1	1	1	0	1	0
11	ETS.1	PEA15_pS116	1	0	1	1	0	1	1	1	1	1	1
12	beta.Catenin	E.Cadherin	1	1	1	1	0	1	1	0	1	1	1
13	Akt_pS473	GSK3.alpha.beta_pS21_S9	0	0	1	0	0	1	0	1	0	1	0
14	ACVRL1	ARHI	1	1	0	0	1	1	1	1	0	0	0
15	Mre11	Stathmin	1	1	1	1	1	0	1	0	0	1	1
16	YAP	YAP_pS127	1	1	1	1	0	1	0	0	1	1	1
17	mTOR	Tuberin	1	1	0	1	0	1	1	1	1	1	1
18	14.3.3_beta	N.Ras	1	1	0	1	0	1	1	1	1	1	1
19	c.Met_pY1235	Stathmin	0	0	0	0	0	1	1	0	0	0	0
20	RBM15	Tuberin	1	0	1	0	0	1	1	1	0	0	0
21	PDK1	PDK1_pS241	1	1	1	1	1	1	1	1	0	0	0
22	GSK3.alpha.beta_pS21_S9	Tuberin_pT1462	1	0	1	0	1	0	1	1	1	1	0
23	Akt_pS473	GSK3_pS9	0	0	1	1	0	1	1	1	1	1	1
24	HER2	HER2_pY1248	1	1	1	1	0	1	0	0	0	0	0
25	CD31	N.Ras	0	0	1	0	0	0	1	0	0	0	0
26	B.Raf	mTOR	0	0	0	0	0	0	1	0	0	1	0
27	ACC1	FASN	1	1	1	1	0	1	1	1	1	1	1
28	14.3.3_beta	ACVRL1	1	1	0	0	0	1	0	1	1	1	1
29	ARHI	N.Ras	0	1	1	1	0	0	1	0	0	0	0
30	GSK3.alpha.beta_pS21_S9	PKC.pan_BetaII_pS660	0	0	0	0	0	0	1	0	0	1	0
31	B.Raf	Tuberin	0	0	0	0	0	1	0	1	0	0	0
32	Ku80	Tuberin	0	0	0	0	0	1	0	0	0	1	0
33	STAT5.alpha	Tuberin	1	1	1	0	0	1	1	0	1	1	1
34	Akt_pS473	Tuberin_pT1462	0	1	1	1	0	1	1	0	1	1	1
35	Akt	Tuberin	1	0	0	0	0	1	0	0	1	1	1
36	mTOR	STAT5.alpha	0	0	0	0	0	1	0	0	0	0	1
37	Akt	mTOR	0	0	0	0	0	1	0	0	1	1	1
38	B.Raf	eIF4G	1	1	1	1	0	1	1	0	1	1	1
39	c.Met_pY1235	Mre11	1	1	0	0	0	0	1	1	0	0	0
40	B.Raf	RBM15	0	0	0	0	0	0	0	0	0	1	0
41	53BP1	RBM15	0	1	0	1	0	1	1	1	1	1	0
42	GSK3_pS9	Tuberin_pT1462	1	1	1	0	1	1	1	0	0	1	0
43	CD31	Mre11	1	0	0	0	0	0	1	0	0	0	0
44	Bap1.c.4	RBM15	1	1	0	1	0	0	1	0	0	0	0
45	GSK3_pS9	NF.kB.p65_pS536	0	0	0	0	0	0	0	0	1	0	0
46	14.3.3_beta	CD31	0	1	0	0	0	0	0	0	0	0	0
47	53BP1	Ku80	0	0	1	1	0	1	1	1	0	1	1
48	53BP1	Tuberin	1	0	0	1	0	1	1	0	0	0	0
49	ACVRL1	N.Ras	1	1	0	0	0	0	0	0	1	1	0
50	53BP1	p70S6K	0	0	0	0	0	0	0	1	0	0	0
51	beta.Catenin	mTOR	0	1	0	0	0	0	0	0	0	0	0
52	Bad_pS112	GSK3.alpha.beta_pS21_S9	0	1	1	0	0	0	0	0	0	0	1
53	53BP1	eIF4G	0	0	0	0	0	1	1	0	1	1	0
54	Bad_pS112	GSK3_pS9	0	0	0	0	0	0	1	0	0	0	0
55	HSP70	Mre11	0	1	0	0	0	1	1	1	0	0	0
56	Bap1.c.4	eIF4G	0	0	1	1	0	1	1	0	0	1	1
57	Akt_pS473	MAPK_pT202_Y204	1	1	0	1	1	1	0	0	0	0	0
58	Ku80	STAT5.alpha	0	0	0	0	0	0	0	0	0	1	0
59	eIF4G	RBM15	1	0	0	0	0	1	0	0	0	1	0
60	Src_pY416	Src_pY527	0	1	1	0	1	1	1	0	1	1	0
61	GSK3_pS9	PKC.pan_BetaII_pS660	0	1	0	0	0	1	1	0	1	0	1
62	GSK3.alpha.beta_pS21_S9	NF.kB.p65_pS536	0	0	1	0	0	0	0	0	1	1	1
63	Bid	Mre11	1	1	0	0	1	0	1	1	1	1	0
64	mTOR	RBM15	0	1	0	0	0	0	0	0	0	0	0
65	Fibronectin	PAI.1	1	1	1	0	0	1	1	1	1	1	0
66	Fibronectin	p21	1	1	0	1	0	1	0	1	0	1	1
67	SCD1	SF2	1	0	1	1	0	1	1	0	1	1	0
68	Bad_pS112	PKC.pan_BetaII_pS660	0	0	0	0	1	0	1	0	1	1	1
69	Ku80	mTOR	1	0	0	0	0	0	0	0	1	0	0
70	Heregulin	N.Ras	1	1	1	0	0	0	1	0	1	0	0
71	EGFR_pY1068	Shc_pY317	1	1	1	1	1	0	1	0	0	1	0
72	Ku80	RBM15	1	0	1	0	0	1	1	1	1	1	0
73	53BP1	B.Raf	0	0	1	0	0	1	1	0	0	1	0
74	ACC_pS79	FASN	0	0	0	0	0	1	1	1	0	0	0
75	Akt_pS473	PRAS40_pT246	1	1	0	0	0	0	0	0	0	1	1
76	53BP1	Bap1.c.4	1	0	0	0	0	1	1	0	0	0	1
77	53BP1	eEF2K	0	0	0	0	0	0	1	0	0	0	0
78	ATM	STAT5.alpha	0	0	0	1	0	1	0	0	0	1	0
79	eIF4G	Tuberin	0	0	0	0	0	1	1	0	0	0	0
80	Akt_pT308	Tuberin_pT1462	1	1	1	1	0	1	1	1	0	1	0
81	eIF4G	p70S6K	0	0	0	0	0	0	1	1	0	0	0
82	mTOR	mTOR_pS2448	0	0	0	0	1	1	0	1	0	0	0
83	N.Ras	Smad4	1	0	0	1	0	1	1	0	1	0	0
84	CD20	Cyclin_D1	0	0	0	0	0	0	1	1	1	1	1
85	Caveolin.1	Collagen_VI	1	1	0	0	0	1	1	1	0	0	0
86	FOXO3a	N.Ras	0	0	0	0	0	0	1	0	0	1	0
87	4E.BP1_pT37T46	Rb_pS807_S811	0	0	1	1	0	1	1	1	0	1	0
88	beta.Catenin	RBM15	0	0	0	0	0	1	1	0	0	0	0
89	S6_pS235_S236	YB.1_pS102	0	0	1	0	1	1	1	0	1	1	1
90	14.3.3_beta	FOXO3a	0	0	0	0	0	1	1	1	1	1	0
91	eEF2K	eIF4G	0	0	1	1	0	1	1	0	0	1	0
92	14.3.3_epsilon	Stathmin	0	0	0	0	0	0	1	0	0	0	0
93	EGFR_pY1173	HER3_pY1289	0	0	1	0	0	0	1	0	0	0	0
94	53BP1	beta.Catenin	0	1	0	1	0	0	1	0	0	1	1
95	53BP1	Akt	0	0	0	0	0	0	0	1	0	0	0
96	GSK3_pS9	PRAS40_pT246	1	0	1	0	0	1	1	0	0	0	0
97	14.3.3_epsilon	N.Ras	0	0	0	1	0	0	0	0	0	1	0
98	Bap1.c.4	S6	0	0	0	0	0	1	0	0	0	0	0
99	MEK1_pS217_S221	p38_pT180_Y182	0	1	1	0	0	1	1	0	0	0	0
100	14.3.3_epsilon	Smad4	1	0	0	0	1	1	0	0	1	0	0
101	GSK3.alpha.beta_pS21_S9	PRAS40_pT246	1	1	1	0	0	1	0	1	0	0	1
102	beta.Catenin	Ku80	0	0	0	0	0	1	0	0	0	0	0
103	NF.kB.p65_pS536	STAT5.alpha	0	0	0	0	0	0	1	0	1	1	1
104	14.3.3_beta	14.3.3_epsilon	0	0	0	0	0	0	0	0	1	1	0
105	MAPK_pT202_Y204	Src_pY527	1	0	1	0	1	0	1	0	0	1	0
106	Cyclin_B1	PCNA	1	0	1	1	0	1	0	0	1	1	0
107	PRAS40_pT246	Tuberin_pT1462	0	1	1	0	0	0	0	1	1	1	1
108	beta.Catenin	eIF4G	0	0	0	0	0	0	0	0	0	1	1
109	Src_pY527	Tuberin_pT1462	0	0	0	0	0	0	0	0	0	1	0
110	53BP1	HER2	0	0	0	1	0	0	0	0	0	1	0
111	ATM	mTOR	0	0	0	0	0	1	0	1	0	1	0
112	B.Raf	p70S6K	0	0	0	0	0	0	0	0	0	0	1
113	eEF2	GAPDH	1	0	1	1	0	1	1	0	0	1	0
114	Dvl3	eIF4G	1	0	0	1	0	0	1	0	0	0	0
115	Bcl.2	Bim	1	0	0	0	0	0	0	0	1	0	1
116	Bap1.c.4	Ku80	0	0	0	0	0	1	1	0	0	0	0
117	MAPK_pT202_Y204	p38_pT180_Y182	0	1	1	0	0	1	0	0	0	0	0
118	B.Raf	Bap1.c.4	0	0	0	0	0	1	1	0	0	0	0
119	AR	ER.alpha	1	1	1	0	0	1	1	0	0	1	0
120	MAPK_pT202_Y204	Tuberin_pT1462	0	0	0	0	0	0	1	0	0	0	0
121	Bap1.c.4	FoxM1	0	0	0	0	0	1	1	0	0	0	0
122	Rictor_pT1135	Tuberin_pT1462	1	1	0	0	0	0	0	0	0	1	0
123	Akt_pS473	NDRG1_pT346	0	1	0	0	0	1	0	0	0	0	0
124	B.Raf	beta.Catenin	0	0	0	0	0	0	0	0	0	1	1
125	JNK_pT183_Y185	MEK1_pS217_S221	0	0	0	0	0	0	0	0	0	1	0
126	ER.alpha	PR	0	0	1	0	0	1	1	0	0	0	0
127	p90RSK	PKC.pan_BetaII_pS660	0	0	0	0	1	0	0	0	1	0	0
128	c.Met_pY1235	EGFR_pY1173	1	1	1	0	0	0	0	0	0	0	0
129	NF.kB.p65_pS536	PKC.pan_BetaII_pS660	0	0	0	0	0	1	0	0	0	0	0
130	Bad_pS112	PDCD4	0	1	0	0	0	1	1	0	0	0	0
131	MAPK_pT202_Y204	mTOR_pS2448	0	0	0	0	0	0	0	0	0	1	0
132	Chk2	Chk2_pT68	0	1	1	0	0	0	0	0	0	0	0
133	GAPDH	TRFC	0	0	0	0	0	0	0	0	0	1	0
134	Cyclin_B1	Cyclin_E1	1	0	1	0	0	0	0	0	0	0	0
135	mTOR_pS2448	Src_pY527	0	0	1	0	0	0	0	0	0	1	0
136	Akt_pT308	NDRG1_pT346	0	0	0	0	0	1	0	0	0	0	0
137	FoxM1	Rab.25	0	0	0	0	1	0	0	0	0	0	0
138	ETS.1	FOXO3a	0	0	0	1	0	0	0	0	0	0	0
139	ARHI	PRAS40_pT246	0	0	0	0	1	0	0	0	0	0	0
140	GAPDH	Rictor_pT1135	0	0	0	0	0	0	1	0	0	0	0
141	BRCA2	Src_pY416	0	0	0	1	0	0	0	0	0	0	0
142	C.Raf	Collagen_VI	0	0	1	0	0	0	0	0	0	0	0
143	Ku80	p38_MAPK	0	0	0	0	0	0	0	0	0	1	0
144	Cyclin_D1	Smad1	0	1	0	0	0	0	0	0	0	0	0
145	c.Jun_pS73	TSC1	0	0	0	1	0	0	0	0	0	0	0
146	p70S6K	Rictor_pT1135	0	0	0	1	0	0	0	0	0	0	0
147	Bak	PDCD4	0	1	0	0	0	0	0	0	0	0	0
148	53BP1	p38_MAPK	0	0	0	0	0	0	0	0	0	1	0
149	GATA3	TIGAR	0	0	0	0	0	0	1	0	0	0	0
150	Akt	Cyclin_D1	0	0	0	0	0	0	0	1	0	0	0
151	ER.alpha	Fibronectin	0	0	1	0	0	0	0	0	0	0	0
152	4E.BP1	p70S6K_pT389	0	0	0	1	0	0	0	0	0	0	0
153	ETS.1	p90RSK_pT359_S363	0	0	0	0	0	1	0	0	0	0	0
154	ETS.1	PI3K.p110.alpha	0	0	1	0	0	0	0	0	0	0	0
155	Cyclin_D1	PI3K.p110.alpha	0	0	0	0	0	1	0	0	0	0	0
156	ACVRL1	PRAS40_pT246	0	0	0	0	1	0	0	0	0	0	0
157	ATM	Claudin.7	0	0	0	0	0	0	0	1	0	0	0
158	BRCA2	PEA15_pS116	0	0	0	0	0	0	0	0	0	0	1
159	Claudin.7	PI3K.p85	0	0	0	0	0	0	0	0	0	1	0
160	Acetyl.a.Tubulin.Lys40	PDK1	0	0	0	0	0	0	0	0	0	1	0
161	Paxillin	XRCC1	0	0	0	0	0	0	0	0	0	0	1
162	ARID1A	N.Cadherin	0	0	0	0	0	1	0	0	0	0	0
163	GAPDH	YAP	0	0	0	0	1	0	0	0	0	0	0
164	Annexin.1	Chk2	0	0	0	0	0	0	1	0	0	0	0
165	cIAP	N.Cadherin	1	0	0	0	0	0	0	0	0	0	0
166	BRCA2	EGFR	0	0	0	0	0	1	0	0	0	0	0
167	beta.Catenin	Lck	0	0	0	1	0	0	0	0	0	0	0
168	ATM	PEA15_pS116	0	0	1	0	0	0	0	0	0	0	0
169	beta.Catenin	YAP	0	0	0	0	0	0	1	0	0	0	0
170	Bak	mTOR_pS2448	0	1	0	0	0	0	0	0	0	0	0
171	FOXO3a_pS318_S321	S6	0	0	0	1	0	0	0	0	0	0	0
172	Annexin.1	HER3	0	0	0	0	0	1	0	0	0	0	0
173	ATM	PDK1	0	0	0	0	0	0	0	0	0	1	0
174	HER2	MEK1_pS217_S221	0	0	0	0	0	0	0	0	0	1	0
175	A.Raf_pS299	ERK2	0	0	0	0	0	1	0	0	0	0	0
176	p27_pT157	TSC1	0	0	0	0	1	0	0	0	0	0	0
177	Bim	p38_pT180_Y182	0	0	0	1	0	0	0	0	0	0	0
178	ERK2	p90RSK_pT359_S363	0	0	0	0	0	1	0	0	0	0	0
179	14.3.3_zeta	JNK2	0	0	0	0	0	0	0	0	0	1	0
180	Chk1_pS345	Mre11	0	1	0	0	0	0	0	0	0	0	0
181	PTEN	Stathmin	0	0	0	1	0	0	0	0	0	0	0
182	AR	RBM15	0	0	0	0	0	1	1	0	0	0	0
183	HER2	PI3K.p110.alpha	0	0	0	0	0	0	1	0	0	0	0
184	AR	eEF2	0	0	0	0	0	0	1	0	0	0	0
185	G6PD	HER3	0	0	0	0	0	1	1	0	0	0	0
186	A.Raf_pS299	PEA15_pS116	0	0	0	0	0	1	0	0	0	0	0
187	NF.kB.p65_pS536	PEA.15	0	0	0	0	0	0	0	0	0	1	0
188	HER2	PDK1	0	0	0	0	0	0	0	0	0	1	0
189	Annexin.1	E.Cadherin	0	0	0	0	0	1	1	0	0	0	0
190	Bax	GSK3_pS9	0	0	0	0	0	0	0	0	1	0	1
191	Collagen_VI	FoxM1	0	0	0	0	0	0	1	0	0	0	0
192	eEF2	Rictor_pT1135	0	0	0	0	0	1	0	0	0	0	0
193	Caveolin.1	RBM15	1	0	0	0	0	0	0	0	0	0	0
194	beta.Catenin	N.Cadherin	0	0	0	0	0	0	0	1	0	0	0
195	14.3.3_zeta	Tuberin	0	0	0	0	0	0	0	0	0	1	0
196	eEF2	PDK1	0	0	0	0	0	0	0	0	1	0	0
197	eIF4G	MEK1_pS217_S221	0	0	0	0	0	0	0	0	0	1	0
198	PEA.15	Rb_pS807_S811	0	0	0	0	0	1	0	0	0	0	0
199	C.Raf_pS338	TSC1	0	0	0	0	0	0	0	0	1	0	0
200	eIF4G	PDK1	0	0	0	0	0	0	0	0	0	1	0
201	14.3.3_zeta	GAB2	0	0	0	0	0	0	0	0	0	1	0
202	p90RSK_pT359_S363	PEA.15	0	0	0	0	1	0	0	0	0	0	0
203	LKB1	RBM15	0	0	1	0	0	0	0	0	0	0	0
204	RBM15	Smad4	0	0	0	0	0	1	0	0	0	0	0
205	Akt	PRDX1	0	0	0	0	0	0	0	0	1	0	0
206	14.3.3_epsilon	GAB2	0	0	0	0	0	0	0	0	0	1	0
207	Fibronectin	p90RSK	0	0	0	0	0	0	1	0	0	0	0
208	PDK1	TSC1	0	0	0	0	0	0	0	0	0	1	0
209	Akt	Chk2_pT68	0	0	0	0	0	0	0	0	1	0	0
210	PEA15_pS116	PI3K.p110.alpha	0	0	1	0	0	0	0	0	0	0	0
211	ERK2	PDK1	0	0	0	0	0	0	0	0	0	1	1
212	Rab11	S6	0	0	0	0	0	0	1	0	0	0	0
213	PDK1	Tuberin	0	0	0	0	0	0	0	0	0	1	0
214	c.Met_pY1235	RBM15	0	0	0	0	0	1	0	0	0	0	0
215	eEF2	PR	0	0	0	0	0	1	0	0	0	0	0
216	14.3.3_zeta	STAT5.alpha	0	0	0	0	0	0	0	0	0	1	0
217	Chk1	JNK2	0	0	0	0	0	0	0	0	0	0	1
218	Ku80	PDK1	0	0	0	0	0	0	0	0	0	1	1
219	PDK1	STAT5.alpha	0	0	0	0	0	0	0	0	1	1	0
220	Collagen_VI	S6	0	0	0	0	0	1	1	0	0	0	0
221	Akt	PDK1	0	0	0	0	0	0	0	0	0	1	0
222	Akt	XRCC1	0	0	0	0	0	1	0	0	0	0	0
223	Mre11	p90RSK	0	0	0	0	0	1	0	0	0	0	0
224	A.Raf_pS299	eEF2	0	0	0	0	0	1	0	0	0	0	0
225	C.Raf_pS338	Ku80	0	0	0	0	0	0	0	0	0	1	0
226	eEF2	ER.alpha	0	0	0	0	0	1	1	0	0	0	0
227	ERK2	MEK1_pS217_S221	0	0	0	0	0	0	0	0	0	0	1
228	CD31	NF.kB.p65_pS536	0	0	0	0	0	0	0	0	1	0	0
229	Rab11	RBM15	1	0	0	0	0	0	0	0	0	0	0
230	PKC.pan_BetaII_pS660	Rad51	0	0	0	0	0	0	0	0	0	1	0
231	E.Cadherin	Fibronectin	0	0	0	0	0	1	1	0	0	0	0
232	ACVRL1	beta.Catenin	0	0	0	0	0	0	0	0	0	1	0
233	Ku80	MEK1_pS217_S221	0	0	0	0	0	0	0	0	0	1	0
234	14.3.3_beta	beta.Catenin	0	0	0	0	0	0	0	0	0	1	0
235	Chk2_pT68	TSC1	0	0	0	0	0	0	0	0	0	0	1
236	Rab11	Tuberin	0	0	0	0	0	0	0	1	0	0	0
237	eEF2	N.Ras	0	0	0	0	0	1	0	0	0	0	0
238	Chk1	NF.kB.p65_pS536	0	0	0	0	0	1	0	0	0	0	0
239	c.Met_pY1235	mTOR	0	0	0	1	0	0	0	0	0	0	0
240	Chk1	eIF4G	0	0	0	0	0	0	0	0	0	1	0
241	Chk1	GAB2	0	0	0	0	0	1	0	0	0	0	0
242	Bid	eIF4G	0	0	0	0	0	1	0	0	0	0	0
243	ACVRL1	RBM15	0	0	0	1	0	0	0	0	0	0	0
244	Tuberin	YAP	0	0	0	0	0	0	1	0	0	0	0
245	E.Cadherin	Mre11	0	0	0	0	0	1	0	0	0	0	0
246	14.3.3_epsilon	Akt	0	0	0	0	0	0	0	0	0	1	0
247	Bap1.c.4	Rab11	0	0	0	0	0	1	0	0	0	0	0
248	Ku80	Mre11	0	0	0	0	0	0	0	0	0	1	0
249	Chk1	TSC1	0	0	0	0	0	0	1	0	0	1	1
250	CD31	RBM15	0	0	0	0	0	1	1	0	0	0	0
251	beta.Catenin	CD31	0	0	0	0	0	0	1	0	0	0	0
252	beta.Catenin	Chk1	0	0	0	0	0	0	0	0	0	1	0
253	CD31	Tuberin	0	0	0	0	0	1	0	1	0	0	0
254	Chk1	eEF2K	0	0	0	0	0	0	1	0	0	0	0
255	mTOR	Rab11	0	0	0	0	0	0	0	1	0	0	0
256	C.Raf_pS338	ERK2	0	0	0	0	0	1	0	0	0	0	0
257	Chk1	Ku80	0	0	0	1	0	0	0	0	0	1	0
258	Collagen_VI	RBM15	1	0	0	1	0	0	0	0	0	0	0
259	PKC.pan_BetaII_pS660	XRCC1	0	0	0	0	0	0	1	0	0	0	0
260	STAT5.alpha	Stathmin	0	0	0	0	0	1	0	0	0	0	0
261	Akt	Chk1	0	0	0	0	0	0	0	0	0	1	1
262	B.Raf	Chk1	0	0	0	0	0	1	0	0	1	1	1
263	53BP1	Chk1	0	0	0	0	0	0	0	0	0	1	0
264	Chk1	Tuberin	0	0	0	0	0	0	0	0	0	1	0
265	Mre11	RBM15	0	0	0	0	0	1	1	0	0	0	0
266	PKC.pan_BetaII_pS660	Stathmin	0	0	0	1	0	0	0	0	0	1	0
267	53BP1	CD31	0	0	0	0	0	1	0	0	0	0	0
268	14.3.3_epsilon	PKC.pan_BetaII_pS660	0	1	0	0	0	0	0	0	0	1	0
269	Chk1	STAT5.alpha	0	0	0	0	0	1	1	0	0	1	1
270	Chk1	Mre11	0	0	0	1	0	0	0	0	1	1	0
271	mTOR	Raptor	1	1	1	1	0	0	0	1	1	1	0
272	53BP1	STAT5.alpha	0	0	0	0	0	1	1	0	0	0	0
273	Chk1	Stathmin	1	1	0	1	1	0	0	0	1	1	0
274	EGFR	EGFR_pY1068	0	0	0	0	0	0	0	1	0	1	1
275	AMPK_alpha	AMPK_pT172	1	1	1	1	1	1	1	1	0	0	0
276	Akt_pT308	PRAS40_pT246	1	1	0	0	0	0	0	0	1	1	0
277	N.Cadherin	TAZ	0	0	0	0	0	0	0	0	0	0	1
278	p70S6K	RBM15	0	0	0	0	0	0	0	0	0	1	1
279	Chk1	Rad51	0	0	0	0	1	0	1	1	0	0	0
280	N.Ras	SF2	1	1	1	0	0	1	1	1	0	0	0
281	C.Raf_pS338	Chk1	0	0	0	0	0	0	0	0	0	1	0
282	Akt	TSC1	0	0	0	0	0	0	0	0	1	1	1
283	eEF2K	Ku80	0	0	0	0	0	0	0	0	0	0	1
284	PKC.alpha_pS657	PKC.delta_pS664	0	0	1	1	1	1	1	1	0	0	0
285	Mre11	TAZ	0	0	0	0	0	0	0	0	1	1	1
286	Bid	N.Cadherin	1	0	1	1	0	0	1	0	0	1	0
287	Mre11	N.Ras	0	0	1	0	0	0	0	0	0	0	0
288	mTOR_pS2448	PKC.pan_BetaII_pS660	0	0	0	0	0	1	0	0	0	0	0
289	Chk2_pT68	Mre11	1	0	0	0	0	0	0	1	0	0	0
290	Mre11	N.Cadherin	0	0	0	0	0	0	0	0	1	1	1
291	Akt	STAT5.alpha	0	0	0	0	0	1	1	0	1	1	1
292	EGFR_pY1068	EGFR_pY1173	0	0	0	0	1	0	0	1	0	0	0
293	DJ.1	PEA.15	1	0	0	0	0	0	0	0	0	0	0
294	Akt_pT308	GSK3.alpha.beta_pS21_S9	0	0	1	0	0	1	0	1	0	0	0
295	Chk2	Cyclin_B1	1	0	0	0	0	0	0	0	0	0	0
296	GAB2	Tuberin	0	0	0	1	0	1	1	0	1	1	0
297	Chk1	N.Cadherin	1	0	0	0	0	0	0	0	0	1	0
298	HER2_pY1248	Src_pY416	0	0	0	0	0	0	0	1	1	1	1
299	Akt	Ku80	0	0	0	0	0	0	0	0	0	1	0
300	N.Ras	SCD1	0	0	1	0	1	1	1	1	0	1	0
301	PKC.delta_pS664	PKC.pan_BetaII_pS660	0	0	1	1	1	0	0	1	0	0	0
302	B.Raf	GAB2	0	1	0	0	0	1	1	0	0	0	0
303	BRCA2	N.Ras	0	0	0	0	0	0	0	0	1	1	1
304	Akt	ERK2	0	0	0	0	0	0	0	0	1	1	1
305	Stathmin	TAZ	0	0	0	0	0	0	0	0	0	0	1
306	HER3_pY1289	Mre11	0	0	0	0	0	0	0	0	1	1	1
307	NF.kB.p65_pS536	Tuberin_pT1462	1	1	1	0	1	0	0	0	0	0	0
308	eIF4G	NF.kB.p65_pS536	1	1	0	0	0	0	1	0	0	0	0
309	ATM	TSC1	0	0	0	0	0	0	1	0	1	1	1
310	mTOR	p90RSK	0	0	0	0	0	1	0	0	0	0	0
311	Bid	Cyclin_D1	0	1	0	1	0	0	0	0	1	0	0
312	4E.BP1_pT37T46	4E.BP1_pT70	1	0	0	0	0	0	0	0	0	1	0
313	B.Raf	STAT5.alpha	0	0	0	0	0	1	1	0	0	0	0
314	Bad_pS112	PRAS40_pT246	0	0	1	0	0	1	0	0	0	0	0
315	Akt_pT308	GSK3_pS9	1	0	1	0	0	1	0	1	0	0	0
316	Bap1.c.4	eEF2K	0	0	0	0	0	1	1	0	0	0	0
317	ATM	Tuberin	0	0	0	0	0	0	0	1	0	1	0
318	GAB2	STAT5.alpha	0	0	0	0	0	1	1	0	0	1	1
319	PKC.pan_BetaII_pS660	STAT5.alpha	1	0	0	0	0	0	0	0	0	1	0
320	c.Met_pY1235	Chk2_pT68	1	1	0	0	0	0	0	1	0	0	1
321	ERK2	PKC.pan_BetaII_pS660	0	0	0	0	0	0	0	0	0	1	0
322	Akt	ATM	0	0	0	0	0	1	0	0	0	1	0
323	GSK3_pS9	Src_pY527	0	1	1	1	0	0	1	0	0	0	0
324	Bid	HSP70	0	1	1	0	0	0	0	0	0	0	0
325	TSC1	Tuberin	0	0	0	0	0	0	0	1	1	1	1
326	Heregulin	SCD1	0	0	0	0	0	1	0	0	0	0	0
327	PKC.pan_BetaII_pS660	Tuberin	0	0	0	0	0	0	0	1	0	0	0
328	p90RSK_pT359_S363	YB.1_pS102	1	1	1	1	0	0	0	0	0	0	0
329	JNK_pT183_Y185	MAPK_pT202_Y204	0	1	0	0	0	1	1	0	0	0	0
330	Caveolin.1	MYH11	1	1	1	1	0	0	1	0	1	0	0
331	Chk2_pT68	Stathmin	0	0	0	0	0	0	0	1	0	0	0
332	RBM15	S6	1	0	0	0	0	0	0	0	0	0	1
333	PKC.alpha	PKC.delta_pS664	0	0	0	0	0	1	1	1	0	0	0
334	HSP70	N.Cadherin	1	0	0	1	0	0	0	0	1	1	0
335	HER2	mTOR	0	0	0	0	0	0	0	0	1	0	0
336	Bid	Rab11	1	1	0	0	0	0	0	1	0	0	0
337	p38_pT180_Y182	PKC.pan_BetaII_pS660	0	1	1	1	0	0	0	0	0	0	0
338	C.Raf_pS338	MEK1_pS217_S221	0	0	1	0	0	0	0	0	1	0	1
339	NF.kB.p65_pS536	Tuberin	0	0	0	0	0	0	0	0	0	1	0
340	Cyclin_D1	Mre11	0	0	0	0	0	0	0	1	0	0	0
341	ARHI	CD31	0	0	1	0	0	0	0	0	0	0	0
342	ERK2	PEA.15	1	1	1	0	1	0	0	1	0	0	0
343	N.Cadherin	Stathmin	1	0	0	1	0	0	0	0	1	0	0
344	HER2	Tuberin	0	0	0	0	0	0	0	0	0	1	0
345	14.3.3_epsilon	c.Met_pY1235	0	0	0	0	1	1	1	0	0	1	0
346	Raptor	Tuberin	0	0	0	0	0	0	0	1	0	0	0
347	BRCA2	Mre11	0	0	0	0	0	0	0	0	1	1	0
348	Cyclin_E2	PCNA	1	1	0	0	0	0	0	0	1	1	0
349	GSK3.alpha.beta_pS21_S9	Rb_pS807_S811	0	0	0	0	0	0	1	0	0	0	0
350	GSK3.alpha.beta_pS21_S9	p38_pT180_Y182	0	1	0	0	0	1	1	0	0	0	0
351	c.Met_pY1235	Rad51	0	0	0	0	0	0	0	1	0	0	0
352	ASNS	Cyclin_B1	1	0	0	0	0	1	0	0	0	0	0
353	Akt_pT308	CDK1	0	0	0	0	0	0	0	0	0	0	1
354	ARID1A	Bap1.c.4	1	1	0	0	0	1	1	1	0	0	0
355	eIF4G	FoxM1	0	0	0	0	0	1	0	0	0	0	0
356	MAPK_pT202_Y204	YB.1_pS102	1	1	1	0	0	0	0	1	1	0	0
357	Bak	c.Met_pY1235	0	0	1	0	0	0	0	0	0	0	0
358	p38_MAPK	p38_pT180_Y182	0	0	0	0	1	0	0	1	0	0	0
359	Claudin.7	E.Cadherin	1	1	0	1	0	0	1	0	1	0	0
360	ERK2	Tuberin	0	0	0	0	0	0	0	0	1	1	1
361	Akt	HER2	0	0	0	0	0	0	0	0	0	1	1
362	GSK3.alpha.beta_pS21_S9	Src_pY527	0	0	1	1	0	1	1	0	0	0	0
363	CD20	ETS.1	1	1	1	0	0	0	0	0	1	0	0
364	NF.kB.p65_pS536	PRAS40_pT246	0	0	1	0	0	0	0	0	0	0	0
365	p38_pT180_Y182	Src_pY527	0	0	1	0	0	0	1	0	0	0	0
366	PKC.alpha_pS657	PKC.pan_BetaII_pS660	0	0	0	0	0	0	0	1	0	0	0
367	Akt	GAB2	0	0	0	0	0	0	0	0	0	1	1
368	Bcl.2	p27	1	0	0	0	0	1	1	0	1	0	1
369	c.Met_pY1235	CD20	0	0	0	0	0	0	0	1	0	0	0
370	eEF2	ERK2	0	0	0	0	0	0	0	0	0	0	1
371	CD20	XBP1	0	0	1	1	0	0	0	0	0	0	0
372	Cyclin_E2	Rad51	0	0	0	0	0	0	1	1	1	0	0
373	Akt	PKC.pan_BetaII_pS660	0	0	0	0	0	0	0	0	0	1	0
374	GSK3_pS9	p38_pT180_Y182	0	1	1	0	0	1	1	0	0	0	0
375	ATM	RBM15	0	0	0	0	1	0	0	1	0	0	0
376	Beclin	XBP1	1	1	0	0	0	0	1	0	0	0	1
377	Bad_pS112	p38_pT180_Y182	1	1	1	1	1	0	0	1	1	0	0
378	c.Met_pY1235	HER3_pY1289	0	0	0	0	1	0	0	0	1	1	1
379	CD31	Rab11	0	0	0	0	1	0	0	0	0	0	0
380	4E.BP1	4E.BP1_pT70	1	1	0	0	0	0	0	0	1	1	0
381	Chk2	FoxM1	0	0	0	0	0	1	0	0	0	1	0
382	G6PD	PRDX1	1	0	1	0	0	0	0	0	0	1	0
383	Cyclin_B1	S6	1	0	0	0	0	0	0	0	0	0	0
384	GSK3.alpha.beta_pS21_S9	MAPK_pT202_Y204	0	0	0	0	0	1	1	0	0	0	0
385	ACC1	Cyclin_B1	0	0	0	0	0	1	0	0	0	0	0
386	EGFR	EGFR_pY1173	0	0	0	0	0	0	0	1	0	0	0
387	GSK3.alpha.beta_pS21_S9	MEK1_pS217_S221	0	1	0	0	0	0	0	0	0	0	0
388	Heregulin	Smad4	0	0	0	1	0	0	0	0	1	0	0
389	Mre11	Rab11	0	0	0	0	0	0	0	1	0	0	0
390	FoxM1	PCNA	0	1	1	0	0	0	0	0	0	1	0
391	Dvl3	Paxillin	0	1	0	0	0	1	1	0	0	0	0
392	ATM	Ku80	0	1	0	0	0	0	0	0	0	0	0
393	Bid	c.Met_pY1235	0	0	0	0	0	0	0	0	0	0	1
394	ARHI	Rab11	1	1	0	0	0	0	0	0	0	0	0
395	S6	S6_pS235_S236	0	0	0	0	0	0	0	1	0	0	0
396	14.3.3_epsilon	ARHI	0	0	1	0	0	0	0	0	0	0	0
397	Cyclin_D1	N.Cadherin	0	0	1	0	0	0	0	0	0	0	0
398	Chk2_pT68	p53	1	0	1	0	0	0	0	0	0	0	0
399	4E.BP1_pS65	4E.BP1_pT37T46	1	1	0	1	0	0	0	0	0	1	0
400	MEK1_pS217_S221	YB.1_pS102	0	0	1	0	0	0	0	0	0	0	0
401	HSP70	TAZ	0	0	0	0	0	0	1	0	0	0	0
402	p21	TAZ	0	0	0	0	0	0	1	0	0	0	0
403	Bid	Stathmin	1	0	0	0	1	0	0	0	0	0	0
404	PDK1_pS241	Tuberin	1	0	0	0	0	0	0	1	0	0	0
405	14.3.3_epsilon	ACVRL1	0	0	0	0	0	0	0	0	1	0	0
406	GSK3_pS9	Rb_pS807_S811	1	0	1	0	0	0	0	0	0	0	0
407	Bak	Bid	0	0	0	0	0	0	1	1	1	0	0
408	JNK_pT183_Y185	p38_pT180_Y182	0	1	0	0	0	0	1	0	0	0	0
409	ARHI	Collagen_VI	0	0	0	0	0	0	0	0	0	0	1
410	eIF4G	GAB2	0	0	0	0	0	1	1	0	0	0	0
411	PEA15_pS116	YB.1	0	0	0	0	0	1	1	0	0	0	0
412	Bad_pS112	YB.1_pS102	0	1	0	0	1	0	0	0	0	0	1
413	GSK3_pS9	MAPK_pT202_Y204	0	0	0	0	0	1	1	0	0	0	0
414	Collagen_VI	Rab11	1	0	1	0	0	0	0	0	0	0	0
415	4E.BP1_pT37T46	Akt_pS473	0	0	0	0	0	0	1	0	0	0	0
416	ATM	Rad50	0	1	0	0	0	0	0	0	1	0	0
417	GSK3_pS9	NDRG1_pT346	0	0	0	0	0	0	1	0	0	0	0
418	Akt	B.Raf	0	0	0	0	0	0	1	0	1	1	0
419	Chk1	Chk2_pT68	0	0	0	0	0	0	0	0	1	0	0
420	Akt_pS473	Src_pY527	0	0	0	0	0	0	1	0	0	0	0
421	EGFR_pY1068	Src_pY416	0	1	1	1	0	0	0	1	0	0	0
422	Beclin	N.Ras	0	0	1	0	0	0	0	0	0	0	0
423	EGFR_pY1173	HER2_pY1248	0	0	0	0	1	0	0	1	0	0	0
424	B.Raf	TSC1	0	0	0	0	0	0	0	0	0	1	0
425	4E.BP1_pT37T46	NDRG1_pT346	0	0	0	0	0	0	1	0	0	0	0
426	Bap1.c.4	Tuberin	0	0	0	0	0	0	1	0	0	0	0
427	NDRG1_pT346	Src_pY527	0	0	0	0	0	1	1	0	0	0	0
428	ARHI	Heregulin	1	1	0	0	0	0	0	0	0	0	0
429	GSK3_pS9	MEK1_pS217_S221	0	1	0	0	0	0	0	0	0	0	0
430	Bcl.xL	PEA15_pS116	0	0	1	0	0	1	0	0	0	0	0
431	N.Cadherin	PEA15_pS116	1	0	1	1	0	0	0	0	0	0	0
432	AR	Mre11	0	0	0	0	0	1	1	0	0	1	0
433	14.3.3_epsilon	CD31	0	0	0	0	0	0	1	0	0	0	0
434	Akt	AMPK_pT172	0	0	0	0	0	0	0	0	0	0	1
435	Bap1.c.4	E.Cadherin	0	0	0	0	0	0	0	0	0	0	1
436	4E.BP1_pT37T46	S6_pS240_S244	0	0	0	0	1	1	0	0	0	0	0
437	c.Jun_pS73	JNK_pT183_Y185	0	1	0	1	0	0	0	0	0	0	0
438	ERK2	STAT5.alpha	0	0	0	0	0	0	0	0	0	1	1
439	Bak	ER.alpha_pS118	0	0	0	1	0	0	0	0	0	1	0
440	mTOR	Rictor	0	0	0	0	0	0	0	1	0	0	1
441	14.3.3_epsilon	CD20	0	0	0	0	0	1	1	0	0	0	0
442	ARHI	Smad4	0	0	0	0	0	0	1	0	0	0	0
443	Rictor	Tuberin	0	0	0	0	0	0	0	1	0	0	0
444	Cyclin_B1	TRFC	0	0	0	0	1	0	0	0	1	0	0
445	Bad_pS112	NF.kB.p65_pS536	0	0	1	1	0	1	1	0	0	1	0
446	CD31	Heregulin	0	0	1	0	0	0	0	0	0	0	0
447	GAB2	Ku80	0	0	0	0	0	1	0	0	0	0	0
448	Tuberin	Tuberin_pT1462	0	0	1	0	1	0	0	1	0	0	0
449	CD20	GATA3	0	0	0	0	0	0	0	1	1	0	1
450	ARHI	SCD1	0	0	0	0	0	0	0	1	0	0	0
451	Caspase.7_cleavedD198	Lck	1	1	0	0	0	0	0	0	0	0	0
452	GAB2	Paxillin	0	0	0	0	0	1	1	0	0	0	0
453	ACVRL1	PDK1	0	0	0	0	0	0	0	0	1	1	0
454	ER.alpha	Mre11	0	0	0	1	0	0	0	0	0	0	0
455	ACVRL1	Collagen_VI	0	0	0	0	0	0	0	0	0	0	1
456	C.Raf_pS338	MAPK_pT202_Y204	0	0	0	0	1	0	0	0	0	0	0
457	CDK1	Cyclin_B1	1	1	1	0	0	0	1	0	0	0	0
458	Bak	EGFR_pY1173	0	0	1	1	0	0	0	0	0	0	0
459	Mre11	Rad51	0	0	0	0	0	0	0	1	0	0	0
460	53BP1	E.Cadherin	0	0	0	0	0	0	1	0	0	0	0
461	N.Cadherin	Rab11	0	0	0	0	0	0	1	0	0	0	0
462	ACVRL1	FOXO3a	0	0	0	0	0	0	0	0	0	1	0
463	14.3.3_beta	SCD1	0	0	0	0	0	1	0	1	0	0	0
464	4E.BP1	eIF4E	0	0	1	0	0	0	0	0	0	0	0
465	mTOR	TSC1	0	0	0	0	0	0	0	0	0	1	0
466	53BP1	GAB2	0	0	0	0	0	1	1	0	0	0	0
467	AMPK_pT172	TSC1	0	0	0	1	0	0	0	0	0	0	1
468	Akt	Paxillin	0	0	0	0	0	0	0	0	0	0	1
469	PI3K.p85	PREX1	0	0	0	1	1	0	0	0	1	0	0
470	Lck	PREX1	0	1	0	1	0	0	0	0	1	1	1
471	PI3K.p85	PTEN	0	0	0	0	0	1	1	1	0	0	0
472	ETS.1	TAZ	0	0	0	0	0	0	0	0	0	0	1
473	c.Jun_pS73	p90RSK_pT359_S363	0	0	0	0	0	0	1	0	0	1	0
474	Raptor	TSC1	0	0	0	0	0	0	0	1	1	1	0
475	Bak	Cyclin_E2	0	0	1	1	0	0	0	0	0	0	0
476	eEF2	PEA15_pS116	0	0	1	0	0	1	1	0	0	0	0
477	ETS.1	N.Cadherin	0	0	0	0	0	1	0	0	0	0	0
478	CD31	Smad4	0	0	0	0	0	1	1	1	0	0	0
479	eEF2K	Tuberin	0	0	0	0	0	0	0	0	0	0	1
480	FASN	S6	0	0	0	0	0	1	0	0	0	0	0
481	Akt	Raptor	0	0	0	0	0	0	0	0	0	1	0
482	PKC.pan_BetaII_pS660	TSC1	0	0	0	0	0	0	0	0	0	1	0
483	HER2	YB.1	0	0	0	0	0	1	1	0	0	1	0
484	E.Cadherin	HER2	0	0	0	1	0	0	0	0	0	0	0
485	EGFR_pY1173	Mre11	0	0	0	0	0	0	1	0	0	0	0
486	14.3.3_beta	PR	0	0	0	1	0	0	0	0	0	0	0
487	BRCA2	Chk1	0	0	0	0	0	0	0	0	0	1	0
488	Fibronectin	TAZ	0	0	0	1	0	0	0	1	0	0	0
489	p90RSK	Tuberin	0	0	0	0	0	1	0	0	1	0	0
490	14.3.3_beta	BRCA2	0	0	0	0	1	0	0	0	0	1	0
491	EGFR_pY1173	Rab11	1	1	0	0	0	0	0	0	0	0	0
492	Caveolin.1	Rictor	0	0	1	0	0	1	1	0	0	0	0
493	STAT5.alpha	TSC1	0	0	0	0	0	0	0	0	0	1	0
494	c.Met_pY1235	CD31	1	0	0	0	0	1	0	0	0	0	1
495	MAPK_pT202_Y204	NDRG1_pT346	0	0	0	0	0	0	1	0	0	0	0
496	E.Cadherin	RBM15	0	0	0	0	0	1	1	0	0	0	0
497	Cyclin_D1	HSP70	0	1	0	0	0	0	0	0	0	0	0
498	PKC.alpha	PKC.pan_BetaII_pS660	0	0	0	0	0	0	0	1	0	0	0
499	p38_pT180_Y182	YB.1_pS102	0	1	0	0	0	0	0	0	0	0	0
500	ACVRL1	Mre11	0	0	0	1	0	0	0	0	0	0	0
501	c.Jun_pS73	MAPK_pT202_Y204	0	0	0	0	0	0	0	0	0	1	0
502	Akt	beta.Catenin	0	0	0	0	0	0	0	0	0	1	0
503	c.Met_pY1235	p27_pT157	0	1	0	0	0	0	0	1	0	0	0
504	c.Jun_pS73	Rb_pS807_S811	0	1	0	0	0	0	0	0	0	0	0
505	Bcl.xL	ETS.1	0	0	1	0	0	0	0	0	0	0	0
506	Chk2_pT68	HER3_pY1289	0	0	0	0	0	0	0	0	1	0	0
507	C.Raf_pS338	Mre11	1	0	0	0	0	0	0	0	0	0	0
508	PRAS40_pT246	Src_pY527	0	0	0	0	0	0	0	0	0	1	0
509	Collagen_VI	Fibronectin	0	0	0	0	0	1	1	0	0	0	0
510	Beclin	CD31	0	1	1	0	0	0	0	0	0	0	0
511	BRCA2	PDK1	0	0	0	0	0	0	0	0	0	1	0
512	c.Met_pY1235	C.Raf_pS338	0	1	0	0	0	0	0	0	0	0	0
513	p90RSK_pT359_S363	PRAS40_pT246	0	1	0	0	0	0	0	0	0	1	0
514	Chk2_pT68	p27_pT157	0	1	0	0	0	0	0	0	0	0	0
515	ARHI	SF2	0	0	0	0	1	0	0	0	0	0	0
516	ETS.1	XBP1	0	0	0	0	0	0	0	1	0	1	0
517	Akt	eIF4G	0	0	0	0	0	0	0	0	0	1	0
518	PCNA	Rad51	0	0	1	0	0	0	1	0	0	0	0
519	Bap1.c.4	p70S6K	0	0	0	0	0	0	0	0	0	1	1
520	ERK2	NF2	0	1	1	0	0	1	0	0	0	1	0
521	PEA.15	Transglutaminase	0	0	0	1	0	0	0	0	0	0	0
522	beta.Catenin	VHL	0	0	0	0	0	0	0	0	0	1	0
523	ERK2	Ku80	0	0	0	0	0	0	0	0	0	1	0
524	beta.Catenin	NF2	1	0	0	0	0	0	0	0	0	0	0
525	C.Raf_pS338	HER3_pY1289	0	0	0	0	0	1	1	0	1	0	0
526	A.Raf_pS299	SCD1	0	0	0	0	0	0	0	1	0	0	0
527	4E.BP1_pT37T46	PRAS40_pT246	0	0	1	0	0	0	0	0	0	0	0
528	4E.BP1_pT37T46	YB.1_pS102	0	0	0	0	0	1	1	0	0	0	0
529	Bcl.xL	Smad3	0	0	0	0	0	0	0	0	1	0	0
530	A.Raf_pS299	N.Ras	0	0	1	0	0	1	1	0	0	0	0
531	N.Ras	PR	0	0	0	0	0	1	1	0	0	0	0
532	eEF2	NF2	0	0	0	1	0	1	0	0	0	0	0
533	Fibronectin	HSP70	0	0	0	0	0	1	0	0	0	0	0
534	Cyclin_E2	Smad3	1	0	0	1	0	0	0	0	0	0	0
535	14.3.3_epsilon	PDK1	0	0	1	0	0	0	0	0	1	1	1
536	Lck	PI3K.p85	0	1	0	0	0	0	0	0	1	1	0
537	eIF4G	S6	0	0	0	0	0	1	0	0	0	0	0
538	p38_pT180_Y182	S6_pS235_S236	0	0	0	0	0	0	0	0	0	0	1
539	Bak	CD20	0	0	0	0	1	0	0	0	0	0	0
540	Bid	EGFR_pY1173	1	1	0	0	0	0	0	0	0	0	0
541	RBM15	TSC1	0	0	0	0	0	0	0	0	0	1	0
542	c.Myc	XBP1	1	0	0	0	1	0	0	0	0	0	0
543	53BP1	Paxillin	0	0	0	0	0	1	0	0	0	0	0
544	HER2_pY1248	HER3	0	0	0	0	0	0	1	0	0	0	0
545	CD20	Rab11	0	0	0	0	0	0	0	1	0	0	0
546	FOXO3a	Mre11	0	0	0	0	0	0	0	0	0	1	0
547	ARHI	ER.alpha	0	0	0	1	0	0	1	0	0	0	0
548	Cyclin_E1	PCNA	0	0	0	0	0	0	0	0	0	1	0
549	HER2	PRAS40_pT246	0	0	0	0	0	0	1	0	0	0	0
550	N.Ras	PDK1	0	0	0	0	0	0	0	0	0	1	1
551	eEF2	ETS.1	0	0	1	1	0	0	0	0	0	0	0
552	eIF4G	TSC1	0	0	0	0	0	0	0	1	0	0	0
553	HER2_pY1248	Shc_pY317	0	0	0	0	0	0	0	0	0	1	1
554	eEF2K	Paxillin	0	0	0	1	0	0	0	0	0	0	0
555	4E.BP1_pT37T46	Bad_pS112	0	0	0	0	0	1	1	0	0	0	0
556	AMPK_alpha	mTOR	0	0	0	1	0	0	0	0	0	0	0
557	ER.alpha	ER.alpha_pS118	1	1	1	0	0	0	0	0	0	0	0
558	mTOR_pS2448	S6_pS240_S244	0	0	0	0	0	0	0	0	0	1	0
559	E.Cadherin	Ku80	0	0	0	0	0	0	1	0	0	0	0
560	Bcl.2	c.Kit	0	0	0	1	0	1	0	0	0	0	0
561	PDK1_pS241	PKC.pan_BetaII_pS660	0	0	0	0	0	0	0	1	0	0	0
562	CD20	EGFR_pY1173	0	0	0	1	0	0	0	0	0	0	0
563	Akt	VHL	0	0	0	0	0	1	0	0	0	0	0
564	eIF4E	MEK1	0	0	1	0	0	0	0	0	0	0	0
565	4E.BP1_pS65	4E.BP1_pT70	1	0	0	0	0	0	0	0	1	1	0
566	HSP70	Rab11	0	1	0	0	0	0	0	1	0	0	0
567	p70S6K_pT389	Shc_pY317	0	0	1	0	0	0	0	0	0	0	0
568	GSK3.alpha.beta	mTOR	0	1	0	0	0	0	0	0	0	0	0
569	Lck	Syk	0	0	0	0	0	0	0	0	1	1	0
570	ACC_pS79	Rb_pS807_S811	0	0	0	0	0	1	0	0	0	0	0
571	Bap1.c.4	Dvl3	0	0	0	0	0	0	0	1	0	0	0
572	GSK3.alpha.beta	PDK1_pS241	0	0	0	0	0	0	0	1	0	0	1
573	eIF4G	STAT5.alpha	0	0	0	0	0	1	1	0	0	0	0
574	Rad51	Stathmin	0	0	0	0	0	0	0	0	1	0	0
575	NF.kB.p65_pS536	p38_pT180_Y182	0	0	1	0	0	0	0	0	0	0	0
576	14.3.3_beta	PDK1	0	0	0	0	0	0	0	0	1	1	0
577	CD20	SF2	0	0	0	0	0	0	1	0	0	0	0
578	BRCA2	TAZ	0	0	0	0	0	0	0	0	0	1	0
579	HER3_pY1289	N.Cadherin	0	0	0	0	0	0	0	0	1	1	1
580	ARHI	CD20	0	1	0	0	0	0	0	0	0	0	0
581	Chk2	Ku80	1	0	0	0	0	0	0	0	0	0	0
582	PDCD4	PKC.pan_BetaII_pS660	0	0	1	1	0	1	1	0	0	0	0
583	E.Cadherin	HER3	0	0	0	0	0	1	0	0	0	0	0
584	GSK3.alpha.beta_pS21_S9	YB.1_pS102	0	0	0	0	0	0	1	0	0	0	0
585	c.Met_pY1235	YAP	0	0	0	0	0	1	0	0	0	0	0
586	AR	PR	0	1	0	0	0	0	0	0	0	0	0
587	14.3.3_zeta	4E.BP1	0	0	0	0	0	0	0	0	0	1	0
588	Mre11	p27_pT157	1	0	0	0	0	0	0	0	0	0	0
589	CD20	PR	0	0	0	0	0	1	0	0	0	0	0
590	p38_pT180_Y182	PDCD4	0	0	0	0	0	0	0	0	0	1	0
591	Collagen_VI	MYH11	0	1	0	0	0	0	0	0	0	0	0
592	PDCD4	S6_pS235_S236	0	0	0	0	0	1	0	0	0	0	0
593	Bax	PEA.15	0	0	0	0	0	0	0	0	0	1	1
594	Cyclin_D1	TAZ	0	0	0	1	0	0	0	0	0	0	0
595	Akt_pT308	Src_pY527	0	0	0	0	0	1	0	0	0	0	0
596	LKB1	Mre11	1	0	0	1	0	0	0	0	0	0	1
597	eIF4E	PCNA	0	0	0	0	0	0	1	0	0	0	0
598	IRS1	Mre11	0	0	0	0	0	0	0	0	0	1	0
599	C.Raf_pS338	EGFR_pY1173	0	0	0	0	0	0	0	0	0	1	0
600	ERK2	TSC1	0	0	0	0	0	0	0	0	1	1	1
601	Chk1	HER3_pY1289	0	0	0	0	0	0	0	0	1	1	0
602	Cyclin_E2	Stathmin	0	0	0	0	0	0	0	1	0	0	0
603	ARHI	Mre11	0	0	1	0	0	0	0	0	0	0	0
604	ARHI	Shc_pY317	0	0	1	0	0	0	0	0	0	0	0
605	Bcl.2	Lck	0	0	0	0	0	0	0	0	0	1	0
606	Chk2	eEF2	1	0	0	0	0	0	0	1	0	1	0
607	Chk1	PDK1	0	0	0	0	0	0	0	0	0	1	1
608	ERK2	GSK3.alpha.beta_pS21_S9	0	0	0	0	1	0	0	0	0	0	0
609	HER2	NF.kB.p65_pS536	0	0	0	0	0	0	0	0	0	1	1
610	eEF2K	ER.alpha_pS118	0	0	0	1	0	0	0	0	0	0	0
611	ERK2	Rad50	0	0	0	0	0	0	0	0	1	0	0
612	GAB2	MIG.6	0	0	0	0	1	0	0	0	0	0	0
613	ACVRL1	Annexin_VII	0	1	0	0	0	0	0	0	0	0	0
614	GSK3.alpha.beta_pS21_S9	NDRG1_pT346	0	0	0	0	0	1	1	0	0	0	0
615	IRS1	Paxillin	0	0	0	0	0	0	1	0	0	0	0
616	Caveolin.1	VEGFR2	0	0	1	0	0	0	1	0	0	0	0
617	Bcl.xL	eEF2	0	0	1	0	0	1	0	0	0	0	0
618	Rb_pS807_S811	YB.1_pS102	0	0	0	0	0	0	1	0	0	0	0
619	Raptor	STAT5.alpha	0	0	0	0	0	0	0	0	0	1	0
620	p90RSK	RBM15	0	0	0	0	1	1	0	0	0	0	0
621	Heregulin	SF2	0	0	0	0	0	0	1	0	0	0	0
622	PEA.15	YAP_pS127	0	0	0	0	1	0	0	0	0	0	0
623	Annexin_VII	N.Ras	0	0	0	0	0	0	0	1	0	0	0
624	E.Cadherin	eEF2K	0	0	0	0	0	1	0	0	0	0	0
625	CD20	MIG.6	0	0	0	0	0	1	0	0	0	0	0
626	ERK2	ETS.1	0	0	0	0	0	1	1	0	0	0	0
627	Bcl.2	DJ.1	1	0	0	1	0	0	0	0	0	0	0
628	Collagen_VI	YAP	0	0	0	0	0	0	0	0	1	0	0
629	GSK3_pS9	p90RSK_pT359_S363	0	1	0	0	0	0	0	0	0	0	0
630	ARID1A	eIF4G	0	0	0	0	0	1	1	0	0	0	0
631	Chk1_pS345	Chk2_pT68	1	1	0	0	0	0	0	0	0	0	0
632	MAPK_pT202_Y204	Src_pY416	0	0	0	0	0	1	0	0	0	0	0
633	ARHI	PR	0	0	0	1	0	0	0	0	0	0	0
634	HER2	PEA15_pS116	0	0	0	0	0	1	1	1	0	0	0
635	Myosin.IIa_pS1943	VEGFR2	0	0	0	0	0	1	0	1	0	0	0
636	eEF2	eEF2K	0	0	0	0	0	0	0	0	0	0	1
637	eEF2K	GAB2	0	0	0	0	0	1	1	0	0	0	0
638	ETS.1	YB.1	0	0	0	0	0	1	1	0	0	0	0
639	Claudin.7	Rab.25	0	0	0	0	0	0	0	0	1	0	0
640	Bak	Smad3	1	0	1	1	0	0	0	0	1	0	0
641	ETS.1	Lck	1	0	1	0	0	0	0	0	0	0	0
642	14.3.3_zeta	Bax	0	0	0	0	0	0	0	0	0	1	0
643	Cyclin_D1	GATA3	0	0	1	0	0	0	0	0	0	0	0
644	Myosin.IIa_pS1943	NF2	0	0	0	0	0	0	0	1	0	0	0
645	FOXO3a	SF2	0	0	0	0	0	1	1	0	0	0	0
646	GAB2	IRS1	0	0	0	0	0	1	0	0	0	0	0
647	HER2_pY1248	PRAS40_pT246	0	0	0	0	0	0	0	0	0	1	0
648	Chk2	S6	0	0	0	1	0	0	0	0	0	0	0
649	Annexin_VII	ARHI	0	0	0	0	0	0	0	1	0	0	0
650	Annexin.1	Fibronectin	0	0	0	0	0	1	1	0	0	0	0
651	Stathmin	YAP	0	0	0	0	0	1	0	0	0	0	0
652	14.3.3_epsilon	p27_pT157	0	0	0	0	0	0	0	0	0	1	0
653	LKB1	TAZ	0	0	0	1	0	0	0	0	0	0	0
654	eIF4G	HER3	0	0	0	0	0	1	1	0	0	0	0
655	c.Jun_pS73	HER2_pY1248	0	0	0	0	0	0	0	0	0	0	1
656	BRCA2	HER3_pY1289	0	0	0	0	0	0	0	0	0	1	0
657	ACVRL1	Smad4	0	0	0	0	0	0	0	0	0	0	1
658	ETS.1	PEA.15	0	0	0	0	0	0	0	0	0	1	0
659	CD31	PDK1	0	0	0	0	0	0	0	0	1	0	1
660	JNK2	PDK1_pS241	0	0	0	0	1	0	0	0	0	0	0
661	14.3.3_zeta	DJ.1	0	0	0	0	0	1	1	0	0	0	0
662	HER3	Tuberin	0	0	0	0	0	0	1	0	0	0	0
663	ARHI	FOXO3a	0	0	0	0	0	0	1	0	0	0	0
664	BRCA2	FOXO3a_pS318_S321	0	0	0	0	0	0	0	0	0	1	0
665	c.Jun_pS73	PRAS40_pT246	0	1	0	0	0	0	0	0	0	1	0
666	Raptor	RBM15	0	0	0	0	0	0	0	0	0	1	0
667	mTOR_pS2448	PDCD4	0	1	0	0	0	0	0	0	0	0	0
668	B.Raf	GSK3.alpha.beta	0	0	0	0	0	0	0	1	0	0	0
669	HER2_pY1248	NF.kB.p65_pS536	0	0	0	0	0	1	0	0	0	0	0
670	eIF4G	Paxillin	0	0	0	0	0	0	1	0	0	0	0
671	PREX1	Syk	0	0	0	0	1	0	0	0	1	0	0
672	CDK1	FoxM1	0	1	0	0	0	0	0	0	0	0	0
673	p38_MAPK	PREX1	0	0	1	1	0	0	0	0	0	0	0
674	ER.alpha_pS118	SF2	0	0	0	1	0	0	0	0	0	0	0
675	A.Raf_pS299	ARHI	0	0	1	0	0	0	0	0	0	0	0
676	Chk1	PCNA	0	0	0	0	0	1	0	0	0	0	0
677	EGFR_pY1068	NF.kB.p65_pS536	0	0	0	0	0	0	1	0	0	0	0
678	PDK1	Smad4	0	0	0	0	0	0	0	0	0	0	1
679	GSK3_pS9	YB.1_pS102	0	0	0	0	0	0	1	0	0	0	0
680	BRCA2	N.Cadherin	0	0	0	0	0	0	0	0	0	1	1
681	ETS.1	HER2	0	0	0	0	0	1	0	0	0	0	0
682	eEF2K	HER3	0	0	0	0	0	1	1	0	0	0	0
683	FOXO3a	SCD1	0	0	0	0	0	1	0	0	0	0	0
684	EGFR_pY1068	HER3_pY1289	1	0	0	0	0	0	0	0	0	0	0
685	ER.alpha	N.Ras	0	0	0	0	0	1	0	0	0	0	0
686	HER2_pY1248	Src_pY527	0	0	0	0	0	0	0	0	1	1	1
687	Bak	FOXO3a	0	1	0	0	0	0	0	0	0	0	0
688	c.Myc	CD20	0	0	0	0	0	0	0	1	1	0	0
689	Collagen_VI	Stathmin	0	0	0	0	0	0	0	0	0	0	1
690	PTEN	RBM15	1	0	0	1	0	0	0	0	0	0	1
691	p53	Stathmin	0	0	0	0	1	0	0	0	0	0	0
692	GSK3.alpha.beta_pS21_S9	p90RSK_pT359_S363	0	1	0	0	0	0	0	0	0	0	0
693	Rad51	TAZ	0	0	0	0	0	0	0	0	1	0	0
694	CD31	LKB1	1	0	0	0	0	0	0	0	0	0	0
695	B.Raf	C.Raf	0	0	0	0	0	1	0	0	0	0	0
696	CD49b	PAI.1	0	0	0	1	0	0	0	0	0	0	0
697	Beclin	Mre11	1	0	0	0	0	0	0	0	0	0	0
698	Annexin_VII	PRDX1	0	1	0	0	0	0	0	0	0	0	0
699	GAB2	HER3	0	0	0	0	0	0	1	0	0	0	0
700	ERK2	PEA15_pS116	0	0	0	0	0	1	0	0	0	0	0
701	p70S6K_pT389	S6_pS240_S244	0	1	0	0	0	0	0	0	0	0	0
702	HER2_pY1248	Tuberin_pT1462	0	0	0	0	0	0	0	0	0	1	0
703	Bak	Caspase.7_cleavedD198	0	0	0	0	0	0	0	1	0	0	0
704	FOXO3a	PR	0	0	0	0	0	1	1	0	0	0	0
705	Bcl.xL	Bid	0	0	1	0	0	0	0	0	0	0	0
706	CD20	N.Cadherin	1	0	0	0	0	0	0	0	0	0	0
707	A.Raf_pS299	FOXO3a	0	0	0	0	0	0	1	0	0	0	0
708	Cyclin_B1	FASN	0	0	0	0	0	1	1	0	0	0	0
709	ER.alpha_pS118	PR	0	1	1	0	0	0	0	0	0	0	0
710	Bid	LKB1	0	0	0	1	0	0	0	0	0	0	0
711	AR	c.Met_pY1235	0	0	0	0	0	1	0	0	0	0	0
712	N.Cadherin	p27_pT157	0	0	1	0	0	0	0	0	0	0	0
713	Annexin.1	EGFR	0	0	0	1	0	0	0	0	0	0	0
714	EGFR	HER2_pY1248	0	0	0	0	0	0	0	1	0	0	0
715	Caveolin.1	CD31	0	0	0	0	0	0	0	0	0	1	0
716	4E.BP1_pS65	FOXO3a_pS318_S321	0	0	0	0	0	1	1	0	0	0	0
717	Bid	IRS1	0	0	0	0	0	0	0	0	1	0	0
718	Beclin	p53	0	0	0	0	1	0	0	0	0	0	0
719	p90RSK_pT359_S363	S6_pS235_S236	0	0	1	0	0	1	0	0	0	0	0
720	Bak	Notch1	0	0	0	0	0	0	0	0	1	0	0
721	MAPK_pT202_Y204	Shc_pY317	0	0	0	0	1	0	0	0	0	0	0
722	FOXO3a_pS318_S321	Rictor	0	0	0	0	1	0	0	0	0	0	0
723	c.Myc	HSP70	0	0	0	1	0	0	0	0	0	0	0
724	TSC1	VEGFR2	0	0	0	1	0	0	0	0	0	0	0
725	p90RSK_pT359_S363	PDCD4	0	1	0	0	0	0	0	0	0	0	0
726	Bcl.xL	Bim	0	1	0	0	0	0	0	0	0	0	0
727	Ku80	NF2	1	0	0	0	0	0	0	0	0	0	0
728	CD31	G6PD	0	0	1	0	0	0	0	0	0	0	0
729	RBM15	Smad3	0	0	1	0	0	0	0	0	0	0	0
730	Cyclin_B1	Rb_pS807_S811	0	0	0	0	0	0	1	0	0	0	0
731	Cyclin_E2	p27_pT157	0	0	0	0	0	0	0	0	1	1	1
732	XBP1	YB.1	0	0	0	0	1	0	0	0	0	0	0
733	BRCA2	XRCC1	0	0	1	0	0	0	0	0	0	0	0
734	Bax	PDK1	0	0	0	0	0	0	0	0	0	1	0
735	CD31	p53	1	0	0	0	0	0	0	1	0	0	0
736	Cyclin_E2	ER.alpha_pS118	0	0	0	1	1	0	0	0	0	0	0
737	p27_pT157	XRCC1	0	0	0	0	1	0	0	0	0	0	0
738	IRS1	Notch1	0	0	0	0	0	0	0	0	1	0	0
739	Cyclin_D1	EGFR_pY1173	0	1	0	0	0	0	0	0	0	0	0
740	Chk2_pT68	N.Cadherin	0	0	0	0	0	0	0	0	1	0	1
741	HER3	Smad4	0	0	0	0	1	0	0	0	0	0	0
742	Akt_pS473	JNK_pT183_Y185	0	0	0	0	0	0	1	0	0	0	0
743	PEA.15	TAZ	0	0	0	0	0	1	1	0	0	0	0
744	CD20	Stathmin	0	0	0	0	0	0	1	0	0	0	0
745	Collagen_VI	p21	0	0	0	0	0	0	0	1	0	0	0
746	14.3.3_epsilon	SCD1	0	0	0	0	0	0	0	0	1	0	0
747	Bid	Notch1	0	1	0	0	0	0	0	0	1	0	0
748	Akt	Dvl3	0	0	0	0	0	0	1	0	0	0	0
749	N.Ras	Rab.25	0	0	0	0	0	0	0	1	0	0	0
750	ER.alpha	N.Cadherin	0	0	0	0	0	0	0	0	0	1	0
751	B.Raf	JNK2	0	0	0	0	1	0	0	0	0	0	0
752	INPP4B	XBP1	0	1	0	0	1	0	0	0	0	0	0
753	eEF2	PCNA	0	0	0	0	0	0	1	0	0	0	0
754	Collagen_VI	LKB1	0	0	0	0	0	0	0	0	0	0	1
755	CD31	SCD1	1	1	0	0	0	0	0	0	0	0	0
756	RBM15	Syk	1	0	0	0	0	0	1	0	0	0	0
757	Chk1	Cyclin_E2	0	0	0	0	0	0	0	1	0	0	0
758	14.3.3_zeta	PRDX1	0	0	0	0	1	0	0	0	0	0	0
759	Cyclin_D1	MIG.6	0	0	1	0	0	0	0	0	0	0	0
760	HER2	HER3	0	0	0	1	0	0	0	0	0	0	0
761	ARHI	Rab.25	0	0	0	0	1	0	0	1	0	0	0
762	mTOR_pS2448	p70S6K_pT389	0	0	0	1	0	0	0	0	0	0	0
763	Dvl3	RBM15	1	0	0	0	0	0	0	0	0	0	1
764	ER.alpha_pS118	Smad3	0	0	0	1	0	0	0	0	0	0	0
765	Smad4	XRCC1	0	1	0	0	0	0	0	0	0	0	0
766	Collagen_VI	FOXO3a_pS318_S321	0	0	0	0	0	0	1	0	0	0	0
767	Bap1.c.4	p62.LCK.ligand	0	0	0	0	0	1	0	0	0	0	0
768	ACC1	mTOR	0	0	0	0	0	0	0	1	0	0	0
769	Dvl3	GAB2	0	0	0	0	0	1	0	0	0	0	0
770	N.Ras	P.Cadherin	0	0	1	1	0	0	0	0	0	0	0
771	AR	N.Cadherin	0	0	0	0	0	0	0	0	0	1	0
772	eEF2	S6	0	1	0	0	0	0	0	0	0	0	0
773	MEK1_pS217_S221	PKC.pan_BetaII_pS660	0	1	0	0	0	0	0	0	0	0	0
774	A.Raf_pS299	PR	0	0	0	0	0	1	1	0	0	0	0
775	E.Cadherin	p90RSK	0	0	1	0	0	0	1	0	0	0	0
776	ACVRL1	LKB1	0	0	0	1	0	0	0	0	0	0	0
777	Bid	Caspase.7_cleavedD198	0	0	0	0	0	0	0	1	0	0	0
778	GAPDH	PCNA	0	0	0	0	0	0	1	0	0	0	0
779	Akt_pS473	p70S6K_pT389	0	1	0	1	0	0	0	0	0	0	0
780	Ku80	VHL	0	0	0	0	0	0	0	0	0	1	0
781	Bap1.c.4	FASN	0	0	0	0	0	0	0	1	0	0	0
782	eIF4G	Notch1	0	0	0	0	0	0	1	0	0	0	0
783	S6	Smad1	0	0	0	0	0	0	1	0	0	0	0
784	HER3_pY1289	p70S6K_pT389	0	0	0	0	1	0	0	0	0	0	0
785	Bax	DJ.1	0	0	0	0	0	0	0	0	0	1	1
786	HER2	INPP4B	0	0	0	1	0	0	0	0	0	0	0
787	GAPDH	PEA15_pS116	0	0	0	0	0	1	0	0	0	0	0
788	eEF2	P.Cadherin	0	0	0	0	0	0	0	0	1	0	0
789	AR	ER.alpha_pS118	0	1	0	0	0	0	0	0	0	0	0
790	FOXO3a_pS318_S321	Mre11	0	0	0	0	0	0	0	0	0	1	0
791	c.Myc	Collagen_VI	0	0	0	1	0	0	0	0	0	0	0
792	MIG.6	PAI.1	0	1	0	0	0	0	0	0	0	0	0
793	FASN	SCD1	0	0	0	1	0	0	0	0	0	0	0
794	Bap1.c.4	HER3	0	0	0	0	0	1	1	0	0	0	0
795	ACVRL1	Rab.25	0	0	0	0	1	0	0	0	0	0	0
796	Dvl3	eEF2K	0	0	0	0	0	1	0	0	0	0	0
797	Beclin	YB.1	0	0	0	0	1	0	0	0	0	0	0
798	MEK1	Src_pY527	1	0	0	0	0	0	0	0	0	0	0
799	Caveolin.1	YAP_pS127	0	0	0	0	0	0	0	0	0	0	1
800	eEF2K	Notch1	0	0	0	0	0	1	0	0	0	0	0
801	Fibronectin	YB.1	0	0	0	0	1	0	0	0	0	1	0
802	NF.kB.p65_pS536	p90RSK_pT359_S363	0	0	0	0	1	0	0	0	0	0	0
803	Bad_pS112	MEK1_pS217_S221	0	1	0	0	0	0	0	0	0	0	0
804	c.Myc	p27_pT157	0	0	0	1	0	0	0	0	0	0	0
805	c.Met_pY1235	Chk1_pS345	0	1	0	0	0	0	0	0	0	0	0
806	p90RSK_pT359_S363	Rb_pS807_S811	0	1	0	0	0	0	0	0	0	0	0
807	Chk1_pS345	p27_pT157	0	1	0	0	0	0	0	0	0	0	0
808	GSK3.alpha.beta	GSK3.alpha.beta_pS21_S9	0	0	0	0	0	0	0	1	0	0	0
809	HER3	XBP1	0	1	0	0	0	0	0	0	0	0	0
810	HER3_pY1289	Shc_pY317	0	0	0	0	1	0	0	0	0	0	0
811	c.Jun_pS73	NF.kB.p65_pS536	0	0	0	0	0	0	1	0	0	0	0
812	Bak	p27_pT198	0	0	1	0	0	0	0	0	0	0	0
813	FOXO3a	PDK1	0	0	0	0	0	0	0	0	0	1	0
814	c.Myc	ETS.1	0	0	0	0	1	0	0	0	0	0	0
815	Caveolin.1	FOXO3a_pS318_S321	0	0	0	0	0	0	1	0	0	0	0
816	Bad_pS112	Chk1_pS345	0	0	1	0	0	0	0	0	0	0	0
817	CD20	Smad3	0	0	1	0	0	0	0	0	0	0	0
818	mTOR	Syk	0	0	0	0	0	1	0	0	0	0	0
819	Bad_pS112	MAPK_pT202_Y204	0	1	0	0	0	0	0	0	0	0	0
820	Bcl.xL	N.Cadherin	0	0	1	0	0	0	0	0	0	0	0
821	14.3.3_beta	A.Raf_pS299	0	0	0	0	0	0	0	1	0	0	0
822	Rictor	VEGFR2	0	0	0	1	0	0	0	0	0	0	0
823	AR	CD31	0	0	0	0	0	0	1	0	0	0	0
824	ACVRL1	PR	0	0	0	0	0	0	1	0	0	0	0
825	ACVRL1	Heregulin	1	0	0	0	0	0	0	0	0	0	0
826	AR	Smad4	0	0	0	0	0	1	0	0	0	0	0
827	GATA3	INPP4B	1	0	0	1	0	0	0	0	0	0	0
828	p90RSK_pT359_S363	Shc_pY317	0	0	0	0	0	0	1	0	0	0	0
829	PCNA	Stathmin	0	0	1	0	0	0	0	0	0	0	0
830	Collagen_VI	PEA.15	0	0	0	0	0	1	1	0	0	0	0
831	p21	YB.1	0	0	0	1	0	0	0	0	0	0	0
832	p90RSK	p90RSK_pT359_S363	0	0	1	0	0	0	0	0	0	0	0
833	4E.BP1_pT70	Chk2_pT68	0	0	0	0	0	0	0	1	0	0	0
834	ACVRL1	PEA15_pS116	0	0	0	0	0	0	0	0	0	0	1
835	AMPK_pT172	ERK2	0	0	0	0	0	0	0	0	0	0	1
836	ARHI	P.Cadherin	0	0	1	1	0	0	0	0	0	0	0
837	ER.alpha_pS118	Smad4	0	0	0	0	1	0	0	0	0	0	0
838	Cyclin_E2	S6	0	0	1	0	0	0	0	0	0	0	0
839	Akt	Rad50	0	0	0	0	0	0	0	0	0	1	0
840	ETS.1	GATA3	0	0	1	0	0	0	0	0	0	0	0
841	Annexin.1	G6PD	0	0	0	0	0	1	0	0	0	0	0
842	ACVRL1	PREX1	0	0	0	0	0	0	0	0	0	1	0
843	4E.BP1_pS65	Rictor	0	0	0	0	0	1	1	0	0	0	0
844	ERK2	VHL	0	0	0	0	0	0	0	0	0	0	1
845	Ku80	Rad50	0	0	0	0	0	0	0	0	0	1	0
846	4E.BP1_pT70	eIF4E	0	0	0	0	0	0	0	0	0	1	0
847	MAPK_pT202_Y204	p90RSK_pT359_S363	0	0	1	0	0	0	0	0	0	0	0
848	AMPK_alpha	GAPDH	0	0	0	0	1	0	0	0	0	0	0
849	CD31	PREX1	0	0	0	0	0	1	0	0	0	0	0
850	Annexin.1	PEA.15	0	0	0	0	0	1	0	0	0	0	0
851	Fibronectin	PEA.15	0	0	0	0	0	1	1	0	0	0	0
852	Annexin_VII	G6PD	0	0	0	0	0	0	0	1	0	0	0
853	Claudin.7	p90RSK	0	0	0	0	0	0	1	0	0	0	0
854	14.3.3_beta	p27_pT157	0	0	0	1	0	0	0	0	0	0	0
855	p38_MAPK	PDK1	0	0	0	0	0	0	0	0	0	1	0
856	53BP1	GATA3	1	0	0	0	0	0	0	1	0	0	0
857	CD20	ER.alpha	0	0	0	0	0	0	0	0	0	0	1
858	p70S6K_pT389	S6_pS235_S236	0	1	0	0	0	0	0	0	0	0	0
859	Annexin.1	YAP_pS127	0	0	0	0	0	0	0	1	0	0	0
860	NF2	Smad3	0	0	0	1	0	0	0	0	0	0	0
861	Collagen_VI	Rictor	0	0	0	0	0	0	1	0	0	0	0
862	C.Raf_pS338	GATA3	0	0	0	0	0	0	0	0	0	0	1
863	FOXO3a_pS318_S321	mTOR_pS2448	0	0	1	0	0	0	0	0	0	0	0
864	GSK3.alpha.beta	GSK3_pS9	0	0	0	0	1	0	0	0	0	0	0
865	HER3_pY1289	Src_pY416	0	0	0	0	1	0	0	0	0	0	0
866	FoxM1	p62.LCK.ligand	0	0	0	0	0	0	1	0	0	0	0
867	PR	SF2	0	0	0	0	0	1	0	0	0	0	0
868	p21	Rad51	0	0	0	0	1	0	0	0	0	0	0
869	Chk1	p38_MAPK	0	0	0	0	0	0	1	0	0	0	0
870	Chk2_pT68	Cyclin_D1	0	0	0	0	0	0	0	1	0	0	0
871	ARHI	EGFR_pY1173	0	0	0	0	0	0	0	0	1	0	0
872	EGFR_pY1173	Src_pY416	0	0	0	0	0	0	0	1	0	0	0
873	ARID1A	Smad1	0	0	0	0	1	0	1	0	0	0	0
874	4E.BP1_pT70	HSP70	0	0	0	0	0	0	0	1	0	0	0
875	c.Jun_pS73	mTOR_pS2448	0	0	0	0	0	0	0	0	0	1	0
876	mTOR	PREX1	0	0	0	0	0	0	0	1	0	0	0
877	Caveolin.1	Rab11	1	0	0	0	0	0	0	0	0	0	0
878	Fibronectin	Myosin.IIa_pS1943	0	1	0	0	0	0	0	0	0	0	0
879	ER.alpha	GATA3	1	0	0	0	0	0	0	0	0	0	0
880	Rad51	Smad3	0	0	0	0	0	0	0	0	1	0	0
881	c.Myc	HER3	0	1	0	0	0	0	0	0	0	0	0
882	IGFBP2	PAI.1	0	0	0	0	0	0	0	1	0	0	0
883	ETS.1	Fibronectin	0	0	0	0	1	0	0	0	0	0	0
884	Beclin	PKC.delta_pS664	1	0	0	0	0	0	0	0	0	0	0
885	Bax	eIF4E	0	0	0	0	0	1	1	0	0	0	0
886	Chk2	PCNA	0	0	0	0	0	0	0	1	0	0	0
887	4E.BP1_pS65	Caveolin.1	0	0	0	0	0	0	1	0	0	0	0
888	Cyclin_E2	EGFR_pY1173	0	0	1	0	0	0	0	0	0	0	0
889	Chk2_pT68	Rab11	0	0	0	0	0	0	0	1	0	0	0
890	Caspase.7_cleavedD198	PREX1	0	0	0	0	0	0	1	0	0	0	0
891	4E.BP1	FoxM1	0	0	0	0	0	0	0	0	1	0	0
892	C.Raf_pS338	Chk1_pS345	0	1	0	0	0	0	0	0	0	0	0
893	Collagen_VI	Mre11	0	0	0	1	0	0	0	0	0	0	0
894	Caveolin.1	Src_pY527	1	0	0	0	0	0	0	0	0	0	0
895	TAZ	YAP	1	0	0	0	0	0	0	0	0	0	0
896	Bcl.xL	GATA3	0	0	1	0	0	0	0	0	0	0	0
897	PREX1	STAT5.alpha	0	0	0	0	1	0	0	0	0	0	0
898	AR	GATA3	1	0	0	0	0	0	0	0	0	0	0
899	4E.BP1	Bim	0	0	0	0	0	1	0	0	0	0	0
900	TRFC	Tuberin	0	1	0	0	0	0	0	0	0	0	0
901	JNK2	PKC.alpha	0	0	0	1	0	0	0	0	0	0	0
902	Caspase.7_cleavedD198	Claudin.7	0	0	0	0	0	1	0	1	0	0	0
903	Rab.25	SF2	0	0	0	0	0	0	0	1	0	0	0
904	A.Raf_pS299	MEK1_pS217_S221	0	1	0	0	0	0	0	0	0	0	0
905	ERK2	YB.1	0	0	0	0	0	1	0	0	0	0	0
906	Bak	Fibronectin	0	0	0	0	0	1	0	0	0	0	0
907	MEK1	PEA15_pS116	0	0	0	0	0	1	0	0	0	0	0
908	FOXO3a_pS318_S321	VEGFR2	0	1	0	0	0	0	0	0	0	0	0
909	Cyclin_E2	RBM15	0	0	1	1	0	0	0	0	0	0	0
910	4E.BP1_pS65	ACVRL1	0	0	0	0	0	0	1	0	0	0	0
911	4E.BP1_pT70	Mre11	0	0	0	0	0	0	0	1	0	0	0
912	Cyclin_E1	GSK3.alpha.beta	0	0	0	1	0	0	0	0	0	0	0
913	Cyclin_E2	Smad4	0	0	0	0	0	0	0	0	0	0	1
914	p38_MAPK	PI3K.p85	1	0	0	0	0	0	0	0	0	0	0
915	Akt	PI3K.p110.alpha	0	0	0	1	0	0	0	0	0	0	0
916	ARHI	TAZ	0	0	0	0	0	0	0	0	0	0	1
917	ACVRL1	PKC.delta_pS664	0	0	0	0	0	0	0	0	0	0	1
918	IRS1	N.Cadherin	0	0	0	0	0	0	0	0	0	1	0
919	Caveolin.1	PAI.1	0	0	0	0	0	0	0	1	0	0	0
920	P.Cadherin	PAI.1	0	0	0	0	0	0	0	1	0	0	0
921	EGFR	ETS.1	0	1	0	0	0	0	0	0	0	0	0
922	Dvl3	IRS1	0	0	0	0	0	0	1	0	0	0	0
923	AMPK_pT172	E.Cadherin	0	0	0	0	0	0	1	0	0	0	0
924	Bid	BRCA2	0	0	0	0	1	0	0	0	0	0	0
925	GATA3	PEA15_pS116	0	0	1	0	0	0	0	0	0	0	0
926	GATA3	VEGFR2	1	0	0	0	0	0	0	0	0	0	0
927	14.3.3_beta	Rab.25	0	0	0	0	0	0	0	1	0	0	0
928	C.Raf	LKB1	0	0	0	0	0	0	0	0	1	0	0
929	Bcl.xL	Rad50	0	0	1	0	0	0	0	0	0	0	0
930	ER.alpha	INPP4B	1	0	0	0	0	0	0	0	0	0	0
931	Beclin	Collagen_VI	0	0	1	1	0	0	0	0	0	0	0
932	CD31	DJ.1	0	0	0	0	0	0	0	0	0	0	1
933	ER.alpha	PREX1	1	0	0	0	0	0	0	0	0	0	0
934	CDK1	p21	0	0	1	0	0	0	0	0	0	0	0
935	AMPK_pT172	PREX1	0	0	0	0	0	0	0	1	0	0	0
936	IGFBP2	NDRG1_pT346	0	0	0	0	0	0	0	0	0	1	0
937	p38_MAPK	Syk	0	0	0	0	0	0	0	1	0	0	0
938	CD31	P.Cadherin	0	0	1	0	0	0	0	0	0	0	0
939	ARHI	FOXO3a_pS318_S321	0	0	0	1	0	0	0	0	0	0	0
940	PI3K.p110.alpha	PTEN	0	0	0	0	0	0	0	1	0	0	0
941	LKB1	Rad51	0	0	0	0	0	0	0	0	0	0	1
942	MYH11	VEGFR2	0	0	1	0	0	0	0	0	0	0	0
943	14.3.3_epsilon	ETS.1	0	0	0	0	0	0	0	0	0	0	1
944	MEK1	Rab11	0	0	0	0	0	1	0	0	0	0	0
945	FOXO3a	Rab11	0	0	0	0	0	0	0	0	0	0	1
946	HER3_pY1289	IRS1	0	0	0	0	0	0	0	0	0	1	0
947	Annexin.1	Annexin_VII	0	0	0	0	0	0	1	0	0	0	0
948	eEF2	GATA3	0	0	1	0	0	0	0	0	0	0	0
949	Annexin.1	PKC.alpha_pS657	1	0	0	0	0	0	0	0	0	0	0
950	GSK3.alpha.beta	Syk	0	1	0	0	0	0	0	0	0	0	0
951	eEF2	Rad51	0	0	0	1	0	0	0	0	0	0	0
952	ETS.1	MEK1	0	0	0	0	0	1	0	0	0	0	0
953	MYH11	Rad50	0	0	0	0	0	0	0	0	0	0	1
954	B.Raf	MEK1	0	0	0	0	0	0	0	1	0	0	0
955	Annexin.1	Lck	1	0	0	0	0	0	0	0	0	0	0
956	GATA3	Src	0	0	0	1	0	0	0	0	0	0	0
957	ACC_pS79	p70S6K	0	0	0	1	0	0	0	0	0	0	0
958	Annexin.1	PREX1	0	0	0	0	0	0	1	0	0	0	0
959	Cyclin_E1	YAP	0	0	0	0	1	0	0	0	0	0	0
960	HER3_pY1289	SCD1	0	0	0	0	0	1	0	0	0	0	0
961	MIG.6	p27_pT157	0	0	1	0	0	0	0	0	0	0	0
962	Chk1_pS345	Cyclin_E1	0	0	0	0	1	0	0	0	0	0	0
963	Beclin	LKB1	0	1	0	0	0	0	0	0	0	0	0
964	Chk2_pT68	SCD1	1	0	0	0	0	0	0	0	0	0	0
965	EGFR_pY1173	TAZ	1	0	0	0	0	0	0	0	0	0	0
966	HER3	INPP4B	0	1	0	0	0	0	0	0	0	0	0
967	14.3.3_beta	XRCC1	0	0	0	0	1	0	0	0	0	0	0
968	GATA3	N.Cadherin	0	0	1	0	0	0	0	0	0	0	0
969	14.3.3_epsilon	Cyclin_E1	0	0	0	0	1	0	0	0	0	0	0
970	Cyclin_E2	PEA15_pS116	0	1	0	0	0	0	0	0	0	0	0
971	BRCA2	Rab.25	0	0	0	0	1	0	0	0	0	0	0
972	Bak	Claudin.7	0	0	0	0	0	0	0	1	0	0	0
973	MEK1	p70S6K_pT389	0	0	0	0	0	0	0	1	0	0	0
974	14.3.3_beta	LKB1	0	0	0	0	0	0	0	0	0	0	1
975	GAB2	GSK3.alpha.beta	0	0	0	0	0	0	0	1	0	0	0
976	GAPDH	Lck	0	0	0	0	0	1	0	0	0	0	0
977	Cyclin_E2	TRFC	0	0	0	1	0	0	0	0	0	0	0
978	SF2	XRCC1	0	0	0	0	0	0	1	0	0	0	0
979	JNK_pT183_Y185	PKC.pan_BetaII_pS660	0	0	0	0	0	0	0	1	0	0	0
980	Chk1_pS345	SCD1	1	0	0	0	0	0	0	0	0	0	0
981	HER2	Src	0	0	0	1	0	0	0	0	0	0	0
982	HER3	PKC.alpha	0	1	0	0	0	0	0	0	0	0	0
983	CD31	Notch1	0	0	0	0	1	0	0	0	0	0	0
984	AR	c.Myc	0	1	0	0	0	0	0	0	0	0	0
985	Heregulin	Rad50	0	0	0	0	0	0	0	0	0	0	1
986	MIG.6	p21	0	1	0	0	0	0	0	0	0	0	0
987	GATA3	PREX1	1	0	0	0	0	0	0	0	0	0	0
988	INPP4B	Src	0	0	0	1	0	0	0	0	0	0	0
989	EGFR	N.Cadherin	1	0	0	0	0	0	0	0	0	0	0
990	ER.alpha_pS118	PRAS40_pT246	0	0	0	1	0	0	0	0	0	0	0
991	AR	Bid	0	0	0	0	0	0	0	0	0	0	1
992	GATA3	Smad1	0	0	0	0	0	0	0	0	0	0	1
993	Caveolin.1	G6PD	0	0	0	0	0	1	0	0	0	0	0
994	HER3	YB.1	0	1	0	0	0	0	0	0	0	0	0
995	JNK_pT183_Y185	MEK1	0	0	0	0	0	0	0	1	0	0	0
996	Claudin.7	YAP	0	0	0	0	0	0	0	1	0	0	0
997	AR	INPP4B	1	0	0	0	0	0	0	0	0	0	0
998	p27_pT157	XBP1	0	0	0	0	0	0	0	1	0	0	0
999	Cyclin_E2	GAPDH	0	0	0	1	0	0	0	0	0	0	0
1000	Bak	RBM15	0	0	1	0	0	0	0	0	0	0	0
1001	GATA3	RBM15	0	0	0	0	1	0	0	0	0	0	0
1002	Cyclin_E2	PDK1	0	1	0	0	0	0	0	0	0	0	0
1003	p62.LCK.ligand	TSC1	0	1	0	0	0	0	0	0	0	0	0
1004	Collagen_VI	HER3	0	1	0	0	0	0	0	0	0	0	0
1005	Collagen_VI	Dvl3	1	0	0	0	0	0	0	0	0	0	0
1006	MIG.6	p70S6K	0	0	0	0	0	0	0	0	1	0	0
1007	EGFR_pY1173	GSK3.alpha.beta	1	0	0	0	0	0	0	0	0	0	0
1008	EGFR	GATA3	1	0	0	0	0	0	0	0	0	0	0

## Sheet: Mean statistics from (A)
	Mean Recurrence	Mean Weight
Positive dominant	4.41912	0.249738
Negative dominant	1.19549	-0.0987387
Heterogeneous	1.56292	0.0925414
